# Supplementary material for: 2024 Reviewers and Guest Editors
Source: Atypon-hosted journal article supplement (doi:10.1287/mnsc.2025.acknowledgements.v71.n4), 2025-04-01
Supplement: mnsc.2025.acknowledgements.v71.n4.sm1.pdf [file mnsc.2025.acknowledgements.v71.n4.sm1.pdf]

## 2024 Management Science All Reviewers

<https://doi.org/10.1287/mnsc.2025.acknowledgements.v71.n4>

Copyright: © 2025 INFORMS

**Abstract.** The editors of *Management Science* acknowledge all our 2024 reviewers and guest associate editors who generously provided expert counsel and guidance on a voluntary basis. We are grateful for their contributions; without them, the journal could not function. Here, we list all reviewers who contributed reviews in 2024.

Abadi, Joseph, Federal Reserve Bank of Philadelphia  
 Abbasi, Babak, Royal Melbourne Institute of Technology  
 Abdallah, Tarek, Northwestern University  
 Abel, Martin, Bowdoin College  
 Abeler, Johannes, University of Oxford  
 Abi-Esber, Nicole, London School of Economics and Political Science  
 Abis, Simona, University of Colorado Boulder  
 Abouee-Mehrizi, Hossein, University of Waterloo  
 Abraham, Mabel, Columbia University  
 Abramova, Inna, Massachusetts Institute of Technology  
 Acharya, Viral, New York University  
 Adam, Martin, University of Göttingen  
 Adbi, Arzi, National University of Singapore  
 Adena, Maja, WZB Berlin Social Science Center  
 Adjerid, Idris, Virginia Polytechnic Institute and State University  
 Adler, Laura, Yale University  
 Aflaki, Arian, University of Pittsburgh  
 Afridi, Farzana, Indian Statistical Institute, Delhi Center  
 Agarwal, Aparajita, University of Pennsylvania  
 Agarwal, Isha, University of British Columbia  
 Agarwal, Saharsh, Indian School of Business  
 Agarwal, Sumit, National University of Singapore  
 Agarwal, Vikas, Georgia State University  
 Agatz, Niels, Erasmus University Rotterdam  
 Aggarwal, Pankaj, University of Toronto  
 Aggarwal, Vikas, INSEAD  
 Aghamolla, Cyrus, University of Minnesota  
 Aghasi, Keivan, University of Sheffield  
 Agnew, Julie, College of William & Mary  
 Agrawal, Anup, University of Alabama  
 Agrawal, Deepak, Carnegie Mellon University  
 Agrawal, Vishal, Georgetown University  
 Aguiar, Luis, University of Zurich  
 Ahern, Kenneth, University of Southern California  
 Ahmadi, Saba, Toyota Technological Institute at Chicago  
 Ahmed, Nur, University of Arkansas  
 Ahnert, Toni, European Central Bank

Ahuja, Vishal, Southern Methodist University  
 Ai, Hengjie, University of Minnesota  
 Aiello, Darren, Brigham Young University  
 Aina, Chiara, Pompeu Fabra University  
 Akartunali, Kerem, Strathclyde Business School  
 Akbas, Ferhat, University of Illinois Chicago  
 Akcay, Alp, Eindhoven University of Technology  
 Akchen, Yi-Chun, University College London  
 Akesaka, Mika, Kobe University  
 Akey, Pat, University of Toronto  
 Akins, Brian, Rice University  
 Akkas, Arzum, University of Massachusetts Amherst  
 Akoglu, Leman, Carnegie Mellon University  
 Akshat, Shubham, University of Houston  
 Aksoy, Billur, Rensselaer Polytechnic Institute  
 Alan, Yasin, Vanderbilt University  
 Aland, John, University of Notre Dame  
 Albuquerque, Ana, Boston University  
 Aleti, Saketh, Duke University  
 Alhusaini, Badryah, Arizona State University  
 Alimohammadi, Yeganeh, Stanford University  
 Alizamir, Saed, Yale University  
 Allen, Abigail, Brigham Young University  
 Allen, Eric, University of California, Riverside  
 Allen, Jenny, Massachusetts Institute of Technology  
 Allen, Ryan, University of Washington  
 Allena, Rohit, University of Houston  
 Almeida, Caio, Princeton University  
 Alok, Shashwat, Indian School of Business  
 Alonso, Ricardo, London School of Economics  
 Alptekinoglu, Aydin, Pennsylvania State University  
 Alsbah, Humoud, Kuwait University  
 Alston, Mackenzie, University of Illinois Urbana-Champaign  
 Altamuro, Jennifer, Villanova University  
 Altug, Mehmet, George Mason University  
 Alur, Rohan, Massachusetts Institute of Technology  
 Alves, Hans, Ruhr University Bochum  
 Alyakoob, Mohammed, University of Southern California  
 Alysandratos, Theodoros, Heidelberg University  
 Ambrose, Brent, Pennsylvania State University

- Ambuehl, Sandro, University of Zurich  
 An, Li, Tsinghua University  
 An, Xudong, Federal Reserve Bank of Philadelphia  
 An, Yu, Johns Hopkins University  
 Analytis, Pantelis, University of Southern Denmark  
 Anand, Amber, Syracuse University  
 Anand, Gopesh, University of Illinois  
 Anand, Vic, University of Illinois Urbana–Champaign  
 Ananthakrishnan, Uttara, Carnegie Mellon University  
 Anantharaman, Divya, Rutgers University  
 Anderer, Arielle, Cornell University  
 Anderson, Anders, Stockholm School of Economics  
 Anderson, Chelsea, University of Cincinnati  
 Anderson, David, Villanova School of Business  
 Anderson, Tracy, Bocconi University  
 Andonov, Aleksandar, University of Amsterdam  
 André, Quentin, University of Colorado Boulder  
 Andrei, Daniel, McGill University  
 Andrevski, Goce, Queen's University at Kingston  
 Andrews, Michael, University of Maryland, Baltimore County  
 Andreyeva, Elena, Texas A&M University  
 Andritsos, Dimitrios, HEC Paris  
 Ang, James, Florida State University  
 Angelucci, Charles, Massachusetts Institute of Technology  
 Anglou, Fiorentia Zoi, University of Texas at Austin  
 Angrisani, Marco, University of Southern California  
 Ano, Leonce, IESE Business School  
 Ansari, Asim, Columbia University  
 Ansari, Sina, DePaul University  
 Antill, Sam, Harvard Business School  
 Anton, Miguel, IESE Business School  
 Antoniou, Constantinos, University of Warwick  
 Anunrojwong, Jerry, Columbia University  
 Aobdia, Daniel, Pennsylvania State University  
 Aolaritei, Liviu, University of California, Berkeley  
 Aouad, Ali, Massachusetts Institute of Technology  
 Aparicio, Diego, University of Navarra  
 Apffelstaedt, Arno, University of Cologne  
 Appel, Ian, University of Virginia  
 Arahamian, Hrayr, Texas A&M University  
 Ararat, Çağın, Bilkent University  
 Araujo, Felipe, Lehigh University  
 Arbatskaya, Maria, Emory University  
 Ardestani-Jaafari, Amir, University of British Columbia  
 Ardia, David, HEC Montréal  
 Argentesi, Elena, University of Bologna  
 Argyle, Bronson, Brigham Young University  
 Argyres, Nicholas, Washington University in St. Louis  
 Aridor, Guy, Northwestern University  
 Arif, Salman, University of Minnesota  
 Arifoglu, Kenan, University College London  
 Arikan, Mazhar, University of Kansas  
 Arlotto, Alessandro, Duke University  
 Armstrong, Christopher, Stanford University  
 Arnosti, Nick, University of Minnesota, Twin Cities  
 Arora, Ashish, Duke University  
 Arora, Kashish, Cornell University  
 Arora, Priyank, University of South Carolina  
 Arora, Siddharth, University of Oxford  
 Arts, Joachim, University of Luxembourg  
 Arts, Sam, KU Leuven  
 Asay, Scott, University of Iowa  
 Ascarza, Eva, Harvard University  
 Aseri, Manmohan, University of Maryland, College Park  
 Ashraf, Anik, Ludwig Maximilian University of Munich  
 Asriyan, Vladimir, Centre de Recerca en Economia Internacional  
 Assenova, Valentina, University of Pennsylvania  
 Astashkina, Ekaterina, University of Michigan  
 Aswani, Jitendra, Fordham University  
 Atanasov, Pavel, IE Business School  
 Atanasov, Tyler, Ohio State University  
 Atanasova, Christina, Simon Fraser University  
 Atanassov, Julian, University of Nebraska  
 Atasoy, Hilal, Rutgers University  
 Atasoy, Ozgun, University of Warwick  
 Atilgan, Yigit, Sabanci University  
 Atir, Stav, University of Wisconsin–Madison  
 Atta-Darkua, Vaska, University of Virginia  
 Attema, Arthur, Erasmus University Rotterdam  
 Atwell, Jon, Stanford University  
 Au, Pak, Hong Kong University of Science and Technology  
 Audia, Pino, Dartmouth College  
 Augustin, Patrick, McGill University  
 Auh, Junkyung, Yonsei University  
 Avenancio-León, Carlos, University of California San Diego  
 Avery, Mallory, Monash University  
 Avgerinos, Emmanouil, University College London  
 Avramidis, Panagiotis, The American College of Greece  
 Avramov, Doron, Reichman University  
 Ayabakan, Sezgin, Temple University  
 Aydin, Deniz, Washington University in St. Louis  
 Aydinliyim, Tolga, Baruch College  
 Ayyaci, Mehmet, University of Texas at Dallas  
 Ayyagari, Meghana, George Washington University  
 Azar, Ofer, Ben-Gurion University of the Negev  
 Azinovic, Marlon, University of Pennsylvania  
 Ba, Cuimin, University of Pittsburgh  
 Baardman, Lennart, University of Michigan  
 Babar, Yash, University of Wisconsin–Madison  
 Baba-Yara, Fahiz, Indiana University  
 Babenko, Ilona, Arizona State University  
 Babin, J. Jobu, DePaul University  
 Babina, Tania, Columbia University

- Babus, Ana, Washington University in St. Louis  
Bachu, Brad, Uniswap Labs  
Backus, Matthew, University of California, Berkeley  
Badoer, Dominique, University of Illinois Chicago  
Bae, Joon Woo, Case Western Reserve University  
Bae, Kee-Hong, York University  
Baek, Jackie, Leonard N. Stern School of Business  
Baghai, Ramin, Stockholm School of Economics  
Bahamou, Achraf, Columbia University  
Bai, Bing, McGill University  
Bai, Hang, University of Connecticut  
Bai, Jiaru, Stony Brook University  
Bai, John (Jianqiu), Northeastern University  
Bailey, Anastasia, Rutgers University  
Bailey, Mckenna, University of Michigan  
Baisa, Brian, Amherst College  
Baker, Andrew, University of California, Berkeley  
Bakke, Tor-Erik, University of Illinois Chicago  
Bakshi, Nitin, University of Utah  
Balachander, Subramanian, University of California, Riverside  
Balachandran, Chanchal, University of Liverpool  
Balachandran, Sarath, London Business School  
Balafoutas, Loukas, University of Exeter  
Balakrishnan, Karthik, Rice University  
Balakrishnan, Maya, University of Texas at Dallas  
Balakrishnan, Ramji, University of Iowa  
Balasubramaniam, Vimal, Queen Mary University of London  
Baldassari, Daphne, University of Southern California  
Baldauf, Markus, University of British Columbia  
Bali, Turan, Georgetown University  
Ball, George, Indiana University  
Ball, Ian, Massachusetts Institute of Technology  
Ballew, Hailey, Rice University  
Balogh, Attila, University of Melbourne  
Baloria, Vishal, Boston College  
Balsmeier, Benjamin, University of Luxembourg  
Balter, Anne, Tilburg University  
Baltussen, Guido, Erasmus University Rotterdam  
Balyuk, Tetyana, Emory University  
Bamberger, Peter, Tel Aviv University  
Bana, Sarah, Stanford University  
Bandi, Chaithanya, National University of Singapore  
Banerjee, Ritwik, Indian Institute of Management–Bangalore  
Banerjee, Sanjay, University of Alberta  
Banerjee, Shrabastee, Tilburg University  
Banki, Daniel, Pompeu Fabra University  
Banuri, Sheheryar, University of East Anglia  
Bao, Chenzhang, Oklahoma State University  
Bao, Jack, University of Delaware  
Bao, Te, Nanyang Technological University  
Bao, Ying, University of Illinois Urbana–Champaign  
Bapna, Sofia, University of Minnesota  
Barach, Moshe, University of Minnesota  
Baranov, Oleg, National Research University Higher School of Economics  
Baranski, Andrzej, New York University–Abu Dhabi  
Barardehi, Yashar, Chapman University  
Barber, Benjamin, IE Business School  
Barbon, Andrea, University of St. Gallen  
Barboni, Giorgia, University of Warwick  
Barcellos, Leonardo, Arizona State University  
Bar-Gill, Sagit, Tel Aviv University  
Barigozzi, Francesca, University of Bologna  
Barjesteh, Nasser, University of Toronto  
Barnett, Michael D., Arizona State University  
Baron, Matthew, Cornell University  
Baron, Opher, University of Toronto  
Barrios, John, University of Chicago  
Barroso, Pedro, Católica Lisbon School of Business & Economics  
Barry, John, Rice University  
Barrymore, Nathan, University of Texas at Austin  
Bartels, Daniel, University of Chicago  
Baruch, Shmuel, University of Rome Tor Vergata  
Basic, Zvonimir, University of Glasgow  
Bastani, Hamsa, University of Pennsylvania  
Basu, Riddha, George Washington University  
Bates, Thomas, Arizona State University  
Baucells, Manel, University of Virginia  
Bauch, Kai, University of Kaiserslautern–Landau  
Bauer, Daniel, University of Wisconsin–Madison  
Bauer, Michael, University of Hamburg  
Bauer, Tim, University of Waterloo  
Bauman, Konstantin, Temple University  
Bavafa, Hessam, University of Wisconsin–Madison  
Baviskar, Sagar, Carnegie Mellon University  
Beardsley, Erik, University of Illinois Urbana–Champaign  
Beatty, Anne, Ohio State University  
Beck, Amanda, Georgia State University  
Becker, Joshua, University College London  
Becker, Markus, University of Southern Denmark  
Becker-Peth, Michael, Erasmus University  
Beckmeyer, Heiner, University of Munster  
Bedford, David, University of Technology Sydney  
Bedre Defolie, Özlem, European University Institute  
Beer, Ruth, Baruch College  
Begen, Mehmet, Western University  
Behn, Markus, European Central Bank  
Bekes, Gabor, Central European University  
Bell, Alex, University of California, Los Angeles  
Bell, J., University of Oxford  
Bellet, Clement, Erasmus University Rotterdam  
Bellon, Aymeric, University of North Carolina at Chapel Hill  
Bellos, Ioannis, George Mason University  
Belo, Frederico, INSEAD  
Belo, Rodrigo, Nova School of Business and Economics

- Belot, Michele, Cornell University  
 Benade, Gerdus, Boston University  
 Beneish, Daniel, Indiana University  
 Benjamin, Daniel, University of Southern California  
 Benjamin, Victor, Arizona State University  
 Bennett, Victor, University of Utah  
 Bennouna, Amine, Massachusetts Institute of Technology  
 Benson, Alan, University of Minnesota  
 Bentley, Alexander, University of Tennessee, Knoxville  
 Bentley, Jeremiah, University of Massachusetts Amherst  
 Benzell, Seth, Chapman University  
 Berbeglia, Franco, Purdue University  
 Berchicci, Luca, Erasmus University Rotterdam  
 Bercovitz, Janet, University of Colorado  
 Berenguer, Gemma, Purdue University  
 Berg, Florian, Massachusetts Institute of Technology  
 Berg, Tobias, Frankfurt School  
 Berger, Allen, University of South Carolina  
 Berger, Elizabeth, University of Houston  
 Bergstresser, Daniel, Brandeis University  
 Berlin, Mitchell, Federal Reserve Bank of Philadelphia  
 Berman, Ron, University of Pennsylvania  
 Bernard, Darren, London Business School  
 Berndt, Antje, Australian National University  
 Bernstein, Asaf, University of Colorado Boulder  
 Bernstein, Ethan, Harvard Business School  
 Berry, Heather, Georgetown University  
 Besik, Deniz, University of Richmond  
 Bettinazzi, Emanuele, Università della Svizzera italiana  
 Bhagwat, Vineet, George Washington University  
 Bhaskaran, Sreekumar, Southern Methodist University  
 Bhat, Gauri, Southern Methodist University  
 Bhatt, Anjali, Harvard Business School  
 Bhatt, Umang, New York University  
 Bhattacharya, Ayan, University of Chicago  
 Bhattacharya, Siddharth, Temple University  
 Bhui, Rahul, Massachusetts Institute of Technology  
 Bi, Xuan, University of Minnesota  
 Bian, Bo, University of British Columbia  
 Bian, Jiang, University of Hong Kong  
 Bianchi, Daniele, University of Warwick  
 Bianchi, Milo, Toulouse School of Economics  
 Bias, Daniel, Vanderbilt University  
 Bibler, Andrew, University of Nevada, Las Vegas  
 Bidwell, Matthew, University of Pennsylvania  
 Biggs, Max, University of Virginia  
 Bijmolt, Tammo, University of Groningen  
 Bikard, Michael, INSEAD  
 Billings, Stephen, University of Colorado Boulder  
 Bird, Yanhua, Boston University  
 Bischof, Jannis, University of Mannheim  
 Bish, Douglas, University of Alabama  
 Bish, Ebru, University of Alabama  
 Bisi, Arnab, The Johns Hopkins University  
 Biswas, Shirsho, University of Washington  
 Bjork, Robert, University of California, Los Angeles  
 Black, Ines, Duke University  
 Black, Lamont, DePaul University  
 Black, Paul, Auburn University  
 Blackburne, Terrence, Oregon State University  
 Blaettchen, Philippe, City, University of London  
 Blair, Michael, Lazaridis School of Business and Economics  
 Blanchard, Simon, Georgetown University  
 Blanco, Christian C., Ohio State University  
 Blanes I Vidal, Jordi, London School of Economics  
 Blasberg, Alexander, University of Duisburg–Essen  
 Blasco, Andrea, Harvard University  
 Bleier, Alexander, Frankfurt School  
 Blettner, Daniela, Simon Fraser University  
 Bliss, Barbara, University of San Diego  
 Block, Adam, Massachusetts Institute of Technology  
 Bloomfield, Matt, University of Pennsylvania  
 Blouin, Jennifer, University of Pennsylvania  
 Bluhm, Richard, University of Stuttgart  
 Blumrosen, Liad, Hebrew University of Jerusalem  
 Blunden, Hayley, American University  
 Bluteau, Keven, Université de Sherbrooke  
 Bo, Inacio, University of York  
 Bobkova, Nina, Rice University  
 Bochkay, Khrystyna, University of Miami  
 Bodnaruk, Andriy, University of Illinois Chicago  
 Boermans, Martijn, De Nederlandsche Bank  
 Bogan, Vicki, Cornell University  
 Bogomolnaia, Anna, University of Glasgow  
 Bogousslavsky, Vincent, Boston College  
 Boguth, Oliver, Arizona State University  
 Boivie, Steven, Texas A&M University  
 Bojd, Behnaz, University of California, Irvine  
 Bojinov, Iavor, Harvard Business School  
 Bol, Jasmijn, Tulane University  
 Bøler, Esther Ann, Imperial College London  
 Bollinger, Bryan, New York University Stern School of Business  
 Boloori, Alireza, University of Washington Tacoma  
 Bonaparte, Yosef, University of Colorado Denver  
 Bondi, Tommaso, Cornell Tech  
 Bonetti, Matteo, De Nederlandsche Bank  
 Bonezzi, Andrea, New York University Stern School of Business  
 Bonfim, Diana, Banco de Portugal  
 Bongaerts, Dion, Erasmus University  
 Bonham, Jonathan, University of Illinois Chicago  
 Bonsall, Samuel, Pennsylvania State University  
 Boosey, Luke, Florida State University  
 Bordalo, Pedro, University of Oxford  
 Boring, Anne, Erasmus University Rotterdam

- Born, Benjamin, Frankfurt School  
Borovicka, Jaroslav, New York University  
Borri, Nicola, Luiss University  
Bortolotti, Stefania, University of Bologna  
Borwankar, Sameer, McGill University  
Bos, Marieke, Stockholm School of Economics  
Bose, Subhonmesh, University of Illinois  
Urbana–Champaign  
Bosetti, Valentina, Bocconi University  
Bosschaerts, Peter, Cambridge University  
Botelho, Tristan, Yale University  
Boudreau, Marie-Claude, University of Georgia  
Boudt, Kris, Ghent University  
Boulatov, Alex, HSE University, Moscow  
Boulongne, Romain, University of Navarra  
Boulou-Reshef, Béatrice, Université d'Orléans  
Boursier, Etienne, French National Institute for  
Research in Digital Science and Technology  
Bourveau, Thomas, Columbia University  
Boussieux, Léonard, University of Washington  
Boute, Robert, Vlerick Business School  
Boutillier, Justin, University of Wisconsin–Madison  
Bouvard, Matthieu, Toulouse School of Economics  
Bouwman, Christa, Texas A&M University  
Bowles, Boone, Texas A&M University  
Boyabatli, Onur, Singapore Management University  
Boyson, Nicole, Northeastern University  
Bozanic, Zahn, Florida State University  
Bradley, Daniel, University of South Florida  
Bradlow, Eric, University of Pennsylvania  
Brahm, Francisco, London Business School  
Brand, James, Microsoft  
Brandfonbrener, David, Harvard University  
Brandimarte, Laura, University of Arizona  
Brandon, Alec, Johns Hopkins University  
Brandts, Jordi, Barcelona Graduate School of  
Economics  
Branstetter, Lee, Carnegie Mellon University  
Braverman, Anton, Northwestern University  
Bravo, Fernanda, University of California, Los  
Angeles  
Braxton, J. Carter, University of Wisconsin–Madison  
Brecko, Kristina, University of Rochester  
Breitmoser, Yves, Bielefeld University  
Brenner, Lyle, University of Florida  
Breon-Drish, Bradyn, University of California, San  
Diego  
Breschi, Stefano, Bocconi University  
Bretscher, Lorenzo, University of Lausanne  
Breuer, Matthias, Columbia University  
Breuer, Patricia, Erasmus University Rotterdam  
Breugem, Thomas, Tilburg University  
Brochet, Francois, Boston University  
Brockman, Paul, Lehigh University  
Brockmeyer, Anne, World Bank  
Brolley, Michael, Wilfrid Laurier University  
Brown, Alexander, Texas A&M University  
Brown, David, Duke University  
Brown, David, University of Arizona  
Brown, James, Iowa State University  
Brown, Jenny, Arizona State University  
Brown, Martin, University of St. Gallen  
Brown, Zach, University of Michigan  
Brownback, Andy, University of Arkansas  
Brownlees, Christian, Universitat Pompeu Fabra  
Brueckner, Jan, University of California, Irvine  
Bruhin, Adrian, University of Lausanne  
Bryan, Kevin, University of Toronto  
Bu, Jinzhi, Hong Kong Polytechnic University  
Bu, Maoliang, Nanjing University  
Buchak, Greg, Stanford University  
Buckman, Joseph, Georgia State University  
Budish, Eric, University of Chicago Booth School of  
Business  
Buell, Ryan, Harvard Business School  
Bühler, Matthias, Ludwig Maximilian University of  
Munich  
Bundy, Jonathan, Arizona State University  
Burbano, Vanessa, Columbia University  
Burke, Joseph, Indiana University Bloomington  
Burks, Jeffrey, University of Notre Dame  
Burn, Ian, University of Liverpool  
Burnap, Alex, Yale University  
Burson, Katherine, University of Michigan  
Busenbark, John, University of Notre Dame  
Buser, Thomas, University of Amsterdam  
Buss, Adrian, Frankfurt School  
Bustamante, Maria, University of Maryland,  
College Park  
Bustamante, Maria Cecilia, University of Maryland  
Butler, Robert, University College Cork  
Byron, Kris, Georgia State University  
Byun, Heejung, Purdue University  
Byzalov, Dmitri, Temple University  
Cabral, Luis, New York University  
Cabrales, Antonio, Universidad Carlos III de Madrid  
Cade, Nicole, University of Pittsburgh  
Cadman, Brian, University of Utah  
Caggese, Andrea, Pompeu Fabra University  
Cai, Huan, Cornell College  
Cai, Jie, Drexel University  
Cai, Wei, Columbia University  
Cai, Ye, Santa Clara University  
Cai, Zhifeng, Rutgers University  
Cakici, Nusret, Fordham University  
Cakici, Ozden, American University  
Calder-Wang, Sophie, University of Pennsylvania  
Calmon, Andre, Georgia Institute of Technology  
Calsamiglia, Caterina, Universitat Pompeu Fabra  
Campbell, Dennis, Harvard University  
Campbell, Joanna, University of Cincinnati  
Campbell, Margaret, University of California, Riverside

- Campbell, Sandy, University of California, Berkeley  
 Campos-Mercade, Pol, Lund University  
 Camuffo, Arnaldo, Bocconi University  
 Candogan, Ozan, University of Chicago  
 Candogan, Sidika Tunç, National University of Singapore  
 Canidio, Andrea, IMT School for Advanced Studies  
 Cantillon, Estelle, Université Libre de Bruxelles  
 Cao, Jie, Hong Kong Polytechnic University  
 Cao, Junyu, University of Texas at Austin  
 Cao, Ping, University of Science and Technology of China  
 Cao, Qingning, Vanderbilt University  
 Cao, Sam, Harvard Business School  
 Cao, Sean, University of Maryland, College Park  
 Cao, Xinyu, Chinese University of Hong Kong  
 Cao, Yufeng, Shanghai Jiao Tong University  
 Cao, Zhi, University of Arizona  
 Cao, Zike, Zhejiang University  
 Capozza, Francesco, Erasmus University Rotterdam  
 Cardella, Laura, Texas Tech University  
 Cardinaels, Eddy, Tilburg University  
 Carlana, Michela, Harvard University  
 Carlson, Natalie, University of Pennsylvania  
 Carlsson, John, University of Southern California  
 Carnehl, Christoph, Bocconi University  
 Carpenter, Christopher, Vanderbilt University  
 Carrera, Clara, INSEAD  
 Carroni, Elias, Università di Bologna  
 Carsten, Chong, The Hong Kong University of Science and Technology  
 Carvalho, Margarida, University of Lausanne  
 Casas Arce, Pablo, Arizona State University  
 Casciaro, Tiziana, University of Toronto  
 Cascino, Stefano, London School of Economics and Political Science  
 Cassar, Lea, University of Regensburg  
 Cassella, Stefano, Tilburg University  
 Castellaneta, Francesco, SKEMA Business School  
 Castellucci, Fabrizio, Bocconi University  
 Castro, Francisco, University of California, Los Angeles  
 Castro, Silvia, Ludwig Maximilian University of Munich  
 Catherine, Sylvain, University of Pennsylvania  
 Ceccarelli, Marco, Vrije Universiteit Amsterdam  
 Cederburg, Scott, University of Arizona  
 Cedergren, Matthew, Santa Clara University  
 Celik, Murat, University of Toronto  
 Celik, Umit, University of North Carolina at Chapel Hill  
 Cen, Ling, Chinese University of Hong Kong  
 Cen, Xiao, Texas A&M University  
 Cesaret, Bahriye, Ozyegin Universitesi  
 Cesari, Tom, University of Ottawa  
 Céspedes, Jacelly, University of Minnesota, Twin Cities  
 Cestone, Giacinta, University of London  
 Cettolin, Elena, Tilburg University  
 Ceylan, Gizem, Yale University  
 Chabakauri, Georgy, London School of Economics  
 Chaderina, Maria, University of Oregon  
 Chague, Fernando, FGV-EESP  
 Chai, Sen, McGill University  
 Chaigneau, Pierre, Queen's University  
 Chakraborty, Ishita, University of Wisconsin–Madison  
 Chakraborty, Soudipta, University of Kansas  
 Chan, Alex, Harvard University  
 Chan, Eric, University of Texas at Austin  
 Chan, Lester, Southern University of Science and Technology  
 Chan, Tian, Emory University  
 Chandon, Pierre, INSEAD  
 Chang, Melody, University of Southern California  
 Chang, Sungyong, Cornell University  
 Chang, Yen-Cheng, National Taiwan University  
 Chapman, Gretchen, Carnegie Mellon University  
 Chapman, Kimball, Arizona State University  
 Charoenwong, Ben, INSEAD  
 Charpentier, Arthur, University of Quebec in Montreal  
 Chatain, Olivier, HEC Paris  
 Chatterjee, Somdeep, Indian Institute of Management–Calcutta  
 Chattopadhyay, Akash, University of Toronto  
 Chaudhry, Aditya, Ohio State University  
 Chauvin, Jasmina, Georgetown University  
 Chavda, Ankur, HEC Paris  
 Chebotarev, Dmitry, Indiana University Bloomington  
 Chemaya, Nir, University of California, Santa Barbara  
 Chen, Aj Yuan, University of British Columbia  
 Chen, Andrew, Federal Reserve Board  
 Chen, Boxiao, University of Illinois Chicago  
 Chen, Chen, New York University Shanghai  
 Chen, Christopher, Indiana University Bloomington  
 Chen, Clara, University of Illinois Urbana–Champaign  
 Chen, Daniel, Boston College  
 Chen, George, Carnegie Mellon University  
 Chen, Guangying, Washington University in St. Louis  
 Chen, Guoli, INSEAD  
 Chen, Hongfan, Chinese University of Hong Kong  
 Chen, Honghui, University of Central Florida  
 Chen, Hongqiao, Nanjing University  
 Chen, Hua, University of Georgia  
 Chen, Huaizhi, University of Notre Dame  
 Chen, Jian, Xiamen University  
 Chen, Jianqing, University of Texas at Dallas  
 Chen, John, Baylor University  
 Chen, Joseph, University of California, Davis  
 Chen, Kaiji, Emory University  
 Chen, Kay-Yut, University of Texas at Arlington

- Chen, Kevin, Duke University  
Chen, Liang, Singapore Management University  
Chen, Louis, Naval Postgraduate School  
Chen, Min, George Mason University  
Chen, Min, Florida International University  
Chen, Mingli, University of Warwick  
Chen, Mingliu, University of Texas at Dallas  
Chen, Ningyuan, University of Toronto  
Chen, Peng-Chu, University of Hong Kong  
Chen, Qi (George), London Business School  
Chen, Qihui, Chinese University of Hong Kong, Shenzhen  
Chen, Qinyi, Massachusetts Institute of Technology  
Chen, Qiushi, Pennsylvania State University  
Chen, Rachel, University of California, Davis  
Chen, Roy, RWTH Aachen University  
Chen, Shi, University of Washington  
Chen, Shuaiyu, Purdue University  
Chen, Tao, Nanyang Technological University  
Chen, Wanning, University of Washington  
Chen, Wei, University of Connecticut  
Chen, Wilbur, Hong Kong University of Science and Technology  
Chen, Xia, Singapore Management University  
Chen, Xiaohan, Xiamen University  
Chen, Xiaole, Sun Yat-sen University  
Chen, Xiaomeng, University of Pittsburgh  
Chen, Xinyun, Chinese University of Hong Kong, Shenzhen  
Chen, Yanyou, University of Toronto  
Chen, Yifei, University of Chicago  
Chen, Yijun, Imperial College London  
Chen, Yilun, Cornell University  
Chen, Ying, National University of Singapore  
Chen, Yiqun, University of Illinois Chicago  
Chen, Yiwei, Temple University  
Chen, Yixing, University of Notre Dame  
Chen, Yong, Texas A&M University  
Chen, Yuxin, New York University Shanghai  
Chen, Zenan, University of Texas at Dallas  
Chen, Zhi, National University of Singapore  
Chen, Zhi, Chinese University of Hong Kong  
Chen, Zhichen, Boston University  
Chen, Zhuo, Tsinghua University  
Chen, Zhuoqiong, Harbin Institute of Technology, Shenzhen  
Chen, Zoey, University of Miami  
Cheng, Aaron, London School of Economics and Political Science  
Cheng, Ing-Haw, University of Toronto  
Cheng, J. Yo-Jud, University of Virginia  
Cheng, Mei, University of Arizona  
Cheng, Si, Syracuse University  
Cheng, Xienan, Peking University  
Cheng, Zhaoqi, Boston University  
Cheung, Paul, University of Texas at Dallas  
Cheung, Stephen, University of Sydney  
Cheung, Wang Chi, National University of Singapore  
Chevalier-Roignant, Benoit, King's College London  
Chevallier, Julien, IPAG Business School  
Cheynel, Edwige, Washington University in St. Louis  
Cheyre, Cristobal, Cornell University  
Child, Travers, China Europe International Business School  
Chinco, Alex, Baruch College  
Chiong, Khai, University of Texas at Dallas  
Chioveanu, Ioana, University of Nottingham  
Chircop, Justin, Lancaster University Management School  
Chiu, Jonathan, Bank of Canada  
Cho, Duckki, University of Sydney  
Cho, Hallie, Vanderbilt University  
Cho, Thummim, Korea University  
Cho, Young Jun, Singapore Management University  
Choe, Chongwoo, Monash University  
Choi, Hojun, Colorado School of Mines  
Choi, Ben, Nanyang Technological University  
Choi, Darwin, Hong Kong University of Science and Technology  
Choi, David, Carnegie Mellon University  
Choi, Dong Beom, Seoul National University  
Choi, Hyun-Soo, Korea Advanced Institute of Science & Technology  
Choi, Jaeho, Hong Kong University of Science and Technology  
Choi, Jaewon, University of Illinois Urbana-Champaign  
Choi, Jay, Michigan State University  
Choi, Jen, University of Michigan  
Choi, Jung Ho, Stanford Graduate School of Business  
Choi, Kyoung Jin, University of Calgary  
Choi, W. Jason, University of Maryland, College Park  
Chopra, Felix, Frankfurt School  
Choudhary, Preeti, University of Arizona  
Choudhary, Vivek, Nanyang Technological University  
Choudhury, Prithwiraj, Harvard Business School  
Christensen, Brant, Brigham Young University  
Christensen, Dane, University of Oregon  
Chu, Leon, Cheung Kong Graduate School of Business  
Chu, Yongqiang, University of North Carolina at Charlotte  
Chua, Yeow, Nanyang Technological University  
Chuan, Amanda, Michigan State University  
Chuang, Hui-Ching, National Taipei University  
Chugh, Dolly, New York University  
Chun, Jinseok, Columbia University  
Chun, So Yeon, INSEAD  
Chung, Kevin, Wisconsin School of Business  
Chung, Sunghun, George Washington University  
Chychyla, Roman, University of Miami

- Chyn, Eric, University of Texas at Austin  
 Chyz, James, University of Tennessee  
 Cianciaruso, Davide, New Economic School  
 Cicero, David, Auburn University  
 Cillo, Alessandra, Cattaneo University  
 Cinelli, Carlos, University of Washington  
 Cinelli, Matteo, Università della Svizzera italiana  
 Cioaca, Larisa, Duke University  
 Ciocan, Florin, INSEAD  
 Cire, Andre, University of Toronto  
 Clara, Nuno, Duke University  
 Clark, Andrew, Paris School of Economics  
 Clark, Jessica, University of Maryland, College Park  
 Clement, Jeffrey, Augsburg University  
 Clement, Julien, Stanford Graduate School of Business  
 Clement, Michel, University of Hamburg  
 Clithero, John, University of Oregon  
 Coad, Alex, University of Sussex  
 Coali, Andrea, Bocconi University  
 Cobo-Reyes, Ramon, Georgetown University in Qatar  
 Codreanu, Mihai, Stanford University  
 Cohen-Zada, Danny, Ben-Gurion University of the Negev  
 Cohn, Jonathan, University of Texas at Austin  
 Cojuharenco, Irina, University of Surrey  
 Colaiacovo, Innessa, Harvard University  
 Colak, Ahmet, Clemson University  
 Colak, Gonul, Hanken School of Economics  
 Cole, Dustin, Auburn University  
 Cole, Shawn, Harvard Business School  
 Coleman, Braiden, University of Georgia  
 Colliard, Jean-Edouard, HEC Paris  
 Collis, Avinash, Carnegie Mellon University  
 Collis, Manuela, University of Toronto  
 Colonnelli, Emanuele, University of Chicago  
 Comerton-Forde, Carole, University of Melbourne  
 Compiani, Giovanni, University of Chicago  
 Cong, Jiajia, City University of Hong Kong  
 Cong, Ziwei, Georgetown University  
 Conlon, Chris, New York University Stern School of Business  
 Contessi, Silvio, Monash University  
 Conti, Annamaria, IE Business School  
 Conti, Raffaele, ESSEC Business School  
 Conway, Jacob, University of Chicago  
 Cookson, J. Anthony, University of Colorado Boulder  
 Cooper, Ian, London Business School  
 Coppola, Antonio, Stanford University  
 Coqueret, Guillaume, Emlyon Business School  
 Cordeiro, James, State University of New York Brockport  
 Core, Fabrizio, LUISS University  
 Corgnet, Brice, Emlyon Business School  
 Corhay, Alexandre, University of Toronto  
 Cornaggia, Kimberly, Pennsylvania State University  
 Cornelissen, Gert, Universitat Pompeu Fabra  
 Cornelius, Philipp, Erasmus University  
 Cornil, Yann, University of British Columbia  
 Corona, Carlos, University of Texas at Austin  
 Correa, Ricardo, Federal Reserve Board  
 Correia, Maria, London School of Economics and Political Science  
 Cortes, Gustavo, University of Florida  
 Cortes, Kristle, University of New South Wales  
 Cosemans, Mathijs, Erasmus University Rotterdam  
 Cosguner, Koray, Indiana University Bloomington  
 Coulomb, Renaud, Mines Paris–PSL  
 Coutts, Alexander, York University  
 Covert, Thomas, University of Chicago  
 Coviello, Decio, HEC Montréal  
 Cowan, Simon, University of Oxford  
 Cowgill, Bo, Columbia University  
 Cowx, Mary, Arizona State University  
 Crainich, David, National Centre for Scientific Research  
 Crama, Pascale, Singapore Management University  
 Cramer, Kim Fe, London School of Economics and Political Science  
 Crawford, Steve, University of Houston  
 Criscuolo, Paola, Imperial College London  
 Cristi, Andrés, Universidad de Chile  
 Crockett, Sean, Baruch College  
 Crosignani, Matteo, Federal Reserve Bank New York  
 Crotty, Kevin, Rice University  
 Crouzet, Nicolas, Northwestern University  
 Crowley, Richard, Singapore Management University  
 Cryder, Cynthia, Washington University in St. Louis  
 Csaszar, Felipe, University of Michigan  
 Cueva, Carlos, University of Alicante  
 Cui, Hailong, University of Minnesota  
 Cui, Liyuan, City University of Hong Kong  
 Cui, Shiliang, Georgetown University  
 Cui, Tony Haitao, University of Minnesota  
 Cui, Wei, University College London  
 Cui, Yao, Cornell University  
 Cui, Yifan, Zhejiang University  
 Cujean, Julien, University of Bern  
 Cullen, Zoe, Harvard Business School  
 Cumming, Douglas, Florida Atlantic University  
 Cunat, Vicente, London School of Economics and Political Science  
 Cunningham, Colleen, University of Utah  
 Cunningham, Lauren, University of Tennessee  
 Cuny, Christine, Leonard N. Stern School of Business  
 Cusimano, Corey, Yale University  
 Custodio, Claudia, Imperial College London  
 Cuypers, Ilya, Singapore Management University  
 Cziraki, Peter, Texas A&M University  
 Da Rin, Marco, Tilburg University  
 Da, Rui, Indiana University  
 Da, Zhi, University of Notre Dame  
 D'Acunto, Francesco, Georgetown University

- Dagostino, Ramona, University of Rochester  
Dahl, Michael S., Aalborg University  
Dahlander, Linus, ESMT Berlin  
Dai, Min, Hong Kong Polytechnic University  
Dai, Na, State University of New York Albany  
Dai, Tinglong, Johns Hopkins University  
Dai, Weijia (Daisy), Lehigh University  
Dai, Zhixin, Renmin University of China  
Dai, Zhonglan, University of Texas at Dallas  
Dalla Fontana, Silvia, ESCP Business School  
Dalton, Michael, Bureau of Labor Statistics  
Dambra, Michael, State University of New York at Buffalo  
Dana, James, Northeastern University  
Dana, Jason, Yale University  
Danaher, Brett, Chapman University  
Danan, Eric, Université de Cergy-Pontoise  
Dang, Viet, University of Manchester  
Dangl, Thomas, Vienna University of Technology  
Daniels, Kaitlin, University of Wisconsin–Madison  
Dannals, Jennifer, Yale University  
Dannhauser, Caitlin, Villanova University  
D’Annunzio, Anna, Toulouse Business School  
Danziger, Shai, Tel-Aviv University  
Dao, Duy, University of Calgary  
Dargnies, Marie-Pierre, Paris Dauphine University  
Dariel, Aurelie, New York University–Abu Dhabi  
Darmouni, Olivier, Columbia University  
Dasgupta, Sudipto, Chinese University of Hong Kong  
Dashmiz, Shayan, Columbia University  
D’Astous, Philippe, HEC Montréal  
Dato, Simon, University of Bonn  
Datta Gupta, Nabanita, Aarhus University  
Datta, Hannes, Tilburg University  
Dau, Luis, Northeastern University  
Daubanes, Julien Xavier, Technical University of Denmark  
Davarnia, Danial, Iowa State University  
D’Avernas, Adrien, Stockholm School of Economics  
Davies, Shaun, University of Colorado at Boulder  
Davila, Eduardo, Yale University  
Davis, Carter, Indiana University  
Davis-Stober, Clinton, University of Missouri  
Davydiuk, Tetiana, Johns Hopkins University  
Daw, Andrew, University of Southern California  
Day, Robert, University of Connecticut  
Dayarian, Iman, University of Alabama  
de Cornière, Alexandre, Toulouse School of Economics  
De Franco, Gus, Purdue University  
De Gardelle, Vincent, Paris School of Economics  
De George, Emmanuel, University of Miami  
De Giorgi, Enrico, University of St. Gallen  
De Haas, Ralph, European Bank for Reconstruction and Development  
de la Rosa, Wendy, University of Pennsylvania  
De Marco, Filippo, Bocconi University  
de Quidt, Jonathan, Stockholm University  
de Rassenfosse, Gaétan, Swiss Federal Technology Institute of Lausanne  
De Roure, Calebe, Reserve Bank of Australia  
De Simone, Lisa, University of Texas at Austin  
De Simone, Rebecca, London Business School  
De Stefano, Federica, University of Oxford  
de Vries, Harwin, Erasmus University Rotterdam  
Dean, Emma, Dartmouth College  
Deangelis, Matthew, Georgia State University  
De-Arteaga, Maria, University of Texas at Austin  
Debo, Laurens, Dartmouth College  
Décaire, Paul, Arizona State University  
Dechenaux, Emmanuel, Kent State University  
Deimen, Inga, University of Arizona  
Dekker, Henri, Vrije Universiteit Amsterdam  
Del Carpio, Lucia, INSEAD  
Delacretaz, David, University of Oxford  
Delana, Kraig, IE Business School  
Delarue, Arthur, Georgia Institute of Technology  
Delecourt, Solène, Stanford University  
Delfgaauw, Josse, Erasmus University Rotterdam  
Delgado, Mercedes, Copenhagen Business School  
Delis, Manthos, Audencia Business School  
Dell’Acqua, Fabrizio, Harvard Business School  
Della Corte, Pasquale, Imperial College London  
Dell’Acqua, Fabrizio, Columbia University  
Deller, Carolyn, University of Pennsylvania  
Delorme, Maxence, Tilburg University  
Demere, Will, Indiana University Bloomington  
Demerjian, Peter, Georgia State University  
Demiguel, Victor, London Business School  
Demirezen, Emre, University of Florida  
Demiroglu, Cem, Koç University  
Den Boer, Arnoud, University of Amsterdam  
Denes, Matthew, Carnegie Mellon University  
Deng, Mingcherng, Baruch College  
Deng, Yiting, University College London  
Deng, Yongheng, University of Wisconsin–Madison  
Dentcheva, Darinka, Stevens Institute of Technology  
Denton, Brian, University of Michigan  
Deodato Domingos, Fernando, FGV-EAESP  
Deolankar, Varad, University of Michigan  
Deore, Aishwaryya, Georgetown University  
Derenoncourt, Ellora, Princeton University  
Desai, Preyas, Duke University  
Desantis, Mark, Chapman University  
Deschamps, Pierre, Stockholm University  
Deshmane, Abhishek, Georgia Institute of Technology  
Desir, Antoine, INSEAD  
Despotakis, Stylianos, City University of Hong Kong  
Dessein, Wouter, Columbia University  
Detzel, Andrew, University of Denver  
Devalkar, Sripad, Indian School of Business  
Devalve, Levi, University of Chicago

- Devine, Avis, York University  
 Dew, Ryan, University of Pennsylvania  
 Dewin, Yasir, HEC Paris  
 Dhanorkar, Suvrat, Pennsylvania State University  
 Dhillon, Paramveer, University of Michigan  
 Dhingra, Vibhuti, York University  
 Diamond, William, University of Pennsylvania  
 Dickerson, Alex, University of New South Wales  
 Dickinson, David, Appalachian State University  
 Dierkes, Maik, Leibniz Universität Hannover  
 Diestre, Luis, IE Business School  
 Dietvorst, Berkeley, University of Chicago  
 Dietzenbacher, Bas, Maastricht University  
 Dikolli, Shane, University of Virginia  
 Dillender, Marcus, Vanderbilt University  
 Dillon, Robin, Georgetown University  
 Dim, Chukwuma, George Washington University  
 Dimitriadis, Stefan, University of Toronto  
 Dimitriadis, Timo, Heidelberg University  
 Dimmock, Stephen, National University of Singapore  
 Ding, Chao, University of Hong Kong  
 Ding, Yi, University of Macau  
 Ding, Yichuan, McGill University  
 Ding, Zijun, Carnegie Mellon University  
 Dionisi, Bernardo, Duke University  
 Distelhorst, Gregory, University of Toronto  
 Dittmar, Robert, Rice University  
 Dlugosz, Jennifer, Federal Reserve Board  
 Doan, Xuan Vinh, University of Warwick  
 Dogan, Battal, University of Bristol  
 Doğan, Gönül, University of Cologne  
 Doganoglu, Toker, University of Würzburg  
 Doh, Jonathan, Villanova University  
 Donahue, Kate, Cornell University  
 Donati, Dante, Columbia University  
 Donelson, Dain, University of Wisconsin–Madison  
 Dong, Jing, Columbia University  
 Dong, Yan, University of South Carolina  
 Dongho, Song, Johns Hopkins University  
 Donkor, Kwabena, Stanford Graduate School of Business  
 Donnelly, Grant, Ohio State University  
 Donnelly, Kristin, University of Chicago  
 Donnelly, Robert, Arena-ai  
 Donovan, John, University of Notre Dame  
 D’Oria, Laura, Iowa State University  
 Dorison, Charles, Georgetown University  
 Dorn, Daniel, Drexel University  
 Dorsey, Jackson, University of Texas at Austin  
 Doshi, Anil, University College London  
 Dou, Winston, University of Pennsylvania  
 Dou, Yifan, Fudan University  
 Dou, Yiwei, New York University  
 Douthit, Jeremy, University of Arizona  
 Dovonon, Prosper, Concordia University  
 Down, Andrea, University of Toronto  
 Draca, Mirko, University of Warwick  
 Draganska, Michaela, Drexel University  
 Drake, Michael, Brigham Young University  
 Drakopoulos, Kimon, University of Southern California  
 Dreber, Anna, Stockholm School of Economics  
 Drexler, Alejandro, Federal Reserve Bank of Chicago  
 Drobner, Christoph, Technical University of Munich  
 Du, Chuan, Board of Governors of the Federal Reserve System  
 Du, Haokun, University of Texas at Dallas  
 Du, Jinzhao, University of Hong Kong  
 Du, Zaichao, Fudan University  
 Duarte, Guilherme Jardim, University of Pennsylvania  
 Duarte, Victor, University of Illinois Urbana–Champaign  
 Dube, Svenja, Baruch College  
 Duffy, Erin, University of Southern California  
 Dugoua, Eugenie, London School of Economics and Political Science  
 Duguay, Raphael, Yale University  
 Duhachek, Adam, University of Illinois Chicago  
 Duke, Kristen, University of Toronto  
 Dulleck, Uwe, Queensland University of Technology  
 Dumas, Tracy, Ohio State University  
 Dumitrescu, Ariadna, Ramon Llull University  
 Dunn, Elizabeth, University of British Columbia  
 Dupont, Quinton, Georgetown University  
 Dur, Umut, North Carolina State University  
 Durand, Rodolphe, HEC Paris  
 Dushnitsky, Gary, London Business School  
 Duso, Tomaso, DIW Berlin  
 Dutcher, Glenn, University of North Carolina at Charlotte  
 Dutt, Nilanjana, Bocconi University  
 Dutta, Sunasir, University of Minnesota  
 Dutz, Deniz, University of Chicago  
 Dyer, Travis, Brigham Young University  
 Dzielinski, Michal, Stockholm Business School  
 Ebert, Jane, Brandeis University  
 Ebert, Sebastian, University of Heidelberg  
 Eckbo, Espen, Dartmouth College  
 Eckel, Catherine, Texas A&M University  
 Eckman, David, Texas A&M University  
 Edelen, Roger M., Virginia Polytechnic Institute and State University  
 Edwards, Alex, University of Toronto  
 Efferson, Charles, University of Lausanne  
 Eftekhari, Mahyar, Arizona State University  
 Eftekhari, Saeede, Tulane University  
 Egan, Mark, Harvard Business School  
 Egger, Peter, ETH Zurich  
 Egorov, Georgy, Northwestern University  
 Eguia, Jon, Michigan State University  
 Ehrig, Timo, Université Libre de Bruxelles

- Ehsani, Sina, Northern Illinois University  
Einhorn, Eti, Tel Aviv University  
Eisdorfer, Assaf, University of Connecticut  
Eisenbach, Thomas, Federal Reserve Bank of New York  
Eisert, Tim, Nova School of Business and Economics  
Eisfeld, Luise, University of Lausanne  
Eklund, John, University of Southern California  
El Hajj, Hussein, Santa Clara University  
El Housni, Omar, Cornell Tech  
El-Amine, Hadi, George Mason University  
Eldar, Ofer, University of California, Berkeley  
Elenev, Vadim, Johns Hopkins University  
Eling, Martin, University of St. Gallen  
Elkamhi, Redouane, University of Toronto  
Elkind, Edith, University of Oxford  
Ellahie, Atif, University of Utah  
Ellingsen, Tore, Stockholm School of Economics  
Ellis, Keaton, University of California, Berkeley  
Ellul, Andrew, Indiana University  
Emadi, Seyed M., University of North Carolina at Chapel Hill  
Emadikhiaiv, Mohsen, Florida Atlantic University  
Embrey, Matthew, Maastricht University  
Enache, Luminita, University of Calgary  
Engel, Ellen, University of Illinois Chicago  
Engelberg, Joseph, University of California, San Diego  
Engl, Florian, University of Regensburg  
Epper, Thomas, University of St. Gallen  
Eraker, Bjorn, University of Wisconsin–Madison  
Erat, Sanjiv, University of California, San Diego  
Erenay, Fatih, University of Waterloo  
Erev, Ido, Technion  
Ericson, Keith, Boston University  
Eriksen, Michael, Purdue University  
Erkal, Nisvan, University of Melbourne  
Erkens, David, China Europe International Business School  
Ermolov, Andrey, Fordham University  
Ernst, Thomas, University of Maryland  
Erol, Atiye, University of Pennsylvania  
Ersahin, Nuri, Michigan State University  
Ertekin, Necati, University of Minnesota  
Ertugrul, Mine, University of Massachusetts Boston  
Escamilla, Rafael, Arizona State University  
Esenduran, Gökçe, Purdue University  
Espinosa, Miguel, Bocconi University  
Espino, Adam, University of Texas at El Paso  
Estep, Cassandra, Emory University  
Esteves-Sorenson, Constanca, Yale University  
Esteve-Volart, Berta, York University  
Estrada Rodriguez, Arturo, Universidade Catolica Portuguesa  
Etesami, S. Rasoul, University of Illinois Urbana–Champaign  
Etro, Federico, Università di Firenze  
Eufinger, Christian, IESE Business School  
Evangelidis, Ioannis, Ramon Llull University  
Evans, Richard, University of Virginia  
Even-Tov, Omri, University of California, Berkeley  
Everhart, Alexander, Washington University in St. Louis  
Evers, Ellen, Haas School, Berkeley  
Eyring, Henry, London School of Economics  
Fabisik, Kornelia, University of Bern  
Fadeev, Evgenii, Duke University  
Fahn, Matthias, Johannes Kepler University Linz  
Faia, Ester, Goethe University  
Falch, Ranveig, NHH Norwegian School of Economics  
Falconieri, Sonia, University of London  
Faley, Olubunmi, Northeastern University  
Faliszewski, Piotr, AGH University of Science and Technology  
Falk, Brett, University of Pennsylvania  
Fallah, Alireza, Massachusetts Institute of Technology  
Fan, Ming, University of Washington  
Fan, Qi, Singapore Management University  
Fan, Tony, University of Alabama  
Fan, Xiaoyu, New York University Stern School of Business  
Fan, Yang, Stanford University  
Fang, Christina, New York University  
Fang, Chuck, Drexel University  
Fang, Ethan, Duke University  
Fang, Lily, INSEAD  
Fang, Limin, University of British Columbia  
Fang, Min, University of Florida  
Fang, Shunlan, Kent State University  
Fang, Xin, Singapore Management University  
Fanning, Jack, Brown University  
Farag, Hisham, University of Birmingham  
Farago, Adam, University of Gothenburg  
Farajollahzadeh, Setareh, McGill University  
Faria-E-Castro, Miguel, Federal Reserve Bank of St. Louis  
Farrell, Max, University of Chicago  
Farrell, Mike, University of Wisconsin–Milwaukee  
Farre-Mensa, Joan, University of Illinois Chicago  
Farronato, Chiara, Harvard Business School  
Fatehi, Soraya, University of Texas at Dallas  
Fath, Sean, Cornell University  
Fatica, Serena, European Commission Joint Research Centre  
Fattahi, Ali, University of California, Los Angeles  
Fattinger, Felix, Vienna University of Economics and Business  
Faurel, Lucile, Arizona State University  
Favilukis, Jack, London School of Economics  
Fay, Scott, Syracuse University  
Fazio, Dimas, National University of Singapore  
Fazli, Amir, University of Washington  
Fedyk, Anastassia, University of California, Berkeley

- Fehder, Daniel, University of Southern California  
 Fehr, Dietmar, Heidelberg University  
 Fehrler, Sebastian, University of Bremen  
 Feigenberg, Ben, University of Illinois Chicago  
 Feinstein, Zachary, Stevens Institute of Technology  
 Feit, Elea, Drexel University  
 Feldhütter, Peter, Copenhagen Business School  
 Feldman, Jacob, Washington University  
 Fellner-Röhling, Gerlinde, Vienna University of Economics and Business  
 Feng, Felix, University of Washington  
 Feng, Gavin, City University of Hong Kong  
 Feng, Guan hao, City University of Hong Kong  
 Feng, Guiyun, Singapore Management University  
 Feng, Ivy, University of Wisconsin–Madison  
 Feng, Josh, University of Utah  
 Feng, Runhuan, Tsinghua University  
 Feng, Suofei, Meta Platforms Inc.  
 Feng, Yiding, University of Chicago  
 Feng, Yifan, National University of Singapore  
 Fernández-Loría, Carlos, Hong Kong University of Science and Technology  
 Fernando, Duarte, Brown University  
 Ferracuti, Elia, Duke University  
 Ferreira, Kris, Harvard Business School  
 Ferreira, Petrus, Rice University  
 Ferri, Fabrizio, University of Miami  
 Fershtman, Chaim, Tel Aviv University  
 Feylessoufi, Antoine, Vanderbilt University  
 Fich, Eliezer, Drexel University  
 Fiechter, Peter, University of Neuchâtel  
 Fiechtner, Lukas, Stanford University  
 Field, Laura, University of Delaware  
 Filipovic, Damir, EPFL  
 Filippas, Apostolos, Fordham University  
 Fillat, Jose, Federal Reserve Bank of Boston  
 Fiocco, Raffaele, University of Bergamo  
 Fiorin, Stefano, Bocconi University  
 Firth, Christopher, Warwick Business School  
 Fischer, Marc, University of Cologne  
 Fisher, Geoffrey, Cornell University  
 Fisher, Matthew, Southern Methodist University  
 Fleming, Michael, Federal Reserve Bank of New York  
 Flicker, Blair, University of South Carolina  
 Floyd, Eric, University of California, San Diego  
 Foerderer, Jens, Technical University of Munich  
 Fong, Christina, Carnegie Mellon University  
 Fong, Hortense, Yale University  
 Fong, Jessica, University of Michigan  
 Fons-Rosen, Christian, University of California, Merced  
 Fontana, Roberto, Bocconi University  
 Forbes, Silke, Tufts University  
 Forker, Ewelina, University of Wisconsin–Madison  
 Fornwagner, Helena, University of Regensburg  
 Forshaw, Rachel, Heriot-Watt University  
 Fossen, Beth, Indiana University Bloomington  
 Fracassi, Cesare, University of Texas at Austin  
 Fradkin, Andrey, Boston University  
 Frake, Justin, University of Michigan  
 Frank, Morgan, University of Pittsburgh  
 Fransoo, Jan, Tilburg University  
 Franzoni, Chiara, Politecnico di Milano  
 Franzoni, Francesco, Università della Svizzera italiana  
 Frazelle, Andrew, University of Texas at Dallas  
 Freeman, Kayla, University of Georgia  
 Freeman, Michael, INSEAD  
 Freeman, Rupert, University of Virginia  
 Freire, Gustavo, Erasmus University Rotterdam  
 Freund, Daniel, Massachusetts Institute of Technology  
 Freundt, Jana, University of Fribourg  
 Frey, Erin, Yale University  
 Fridman, Ariel, Ramon Llull University Esade  
 Friebe, Guido, Goethe University  
 Friedberg, Leora, University of Virginia  
 Friedman, Elizabeth, Columbia University  
 Friedrichsen, Jana, University of Kiel  
 Friewald, Nils, Norwegian School of Economics  
 Fry, Caroline, University of Hawai'i at Manoa  
 Frydman, Cary, University of Southern California  
 Fu, Qiang, National University of Singapore  
 Fu, Runshan, New York University Stern School of Business  
 Fügener, Andreas, University of Cologne  
 Fugger, Nicolas, University of Cologne  
 Fulker, Zachary, Northeastern University  
 Fulop, Andras, ESSEC Business School  
 Funk, Russell, University of Minnesota  
 Fusari, Nicola, Johns Hopkins University  
 Fuster, Andreas, EPFL  
 Gabel, Sebastian, Erasmus University Rotterdam  
 Gaduh, Arya, University of Arkansas  
 Gaechter, Simon, University of Nottingham  
 Gaertig, Celia, University of California, Berkeley  
 Gaessler, Fabian, Max Planck Institute for Innovation and Competition  
 Gagliardi, Luisa, Bocconi University  
 Gagnon-Bartsch, Tristan, Florida State University  
 Galak, Jeff, Carnegie Mellon University  
 Galasso, Alberto, University of Toronto  
 Gale, Brian, University of Washington  
 Galeotti, Fabio, University of Lyon  
 Gallagher, Emily, University of Colorado Boulder  
 Gallani, Susanna, Harvard Business School  
 Gallemore, John, University of Chicago  
 Galperin, Roman, McGill University  
 Gamez-Djokic, Monica, Purdue University  
 Gan, Jingxing (Rowena), Southern Methodist University  
 Gan, Kyra, Harvard University  
 Ganco, Martin, University of Wisconsin–Madison  
 Gandhi, Ashvin, University of California, Los Angeles

- Ganduri, Rohan, Emory University  
Ganguli, Ina, University of Massachusetts Amherst  
Ganju, Kartik, University of Minnesota, Twin Cities  
Ganz, Scott, Georgetown University  
Gao Fritz, Qi, SKEMA Business School  
Gao, Chao, Australian National University  
Gao, Fei, Indiana University Bloomington  
Gao, Feng, Rutgers University  
Gao, Guodong, Johns Hopkins University  
Gao, Janet, Georgetown University  
Gao, Long, University of California, Riverside  
Gao, Pengjie, University of Notre Dame  
Gao, Qiang, Baruch College  
Gao, Rui, University of Texas at Austin  
Gao, Ruijiang, University of Texas at Austin  
Gao, Sarah Yini, Lee Kong Chian School of Business  
Gao, Xiangyu, Chinese University of Hong Kong  
Gao, Xiaoquan, Purdue University  
Gao, Xingchao, University of Toronto  
Gao, Yang, University of Illinois Urbana–Champaign  
Gao, Yi, Texas Tech University  
Gao, Yu, Peking University  
Gao, Yuetao, Xiamen University  
Gao, Zhan, Lancaster University Management School  
Gao, Zhenyu, Chinese University of Hong Kong  
Gao, Zijun, University of Southern California  
Gao, Zuguang, University of California, Irvine  
Gao-Bakshi, Xiaohui, Temple University  
Garcia Lara, Juan Manuel, Universidad Carlos III de Madrid  
Garcia, Daniel, University of Vienna  
Garcia, Diego, University of North Carolina at Chapel Hill  
Garcia, Gian-Gabriel, Georgia Institute of Technology  
Garcia, Stephen, University of California, Davis  
Garel, Alexandre, Audencia Business School  
Garg, Nikhil, Cornell University  
Garg, Rajiv, Emory University  
Garg, Sam, Hong Kong University of Science and Technology  
Gargano, Antonio, University of Houston  
Garlappi, Lorenzo, University of British Columbia  
Garmaise, Mark, University of California, Los Angeles  
Garratt, Rod, University of California, Santa Barbara  
Garrett, Daniel, University of Pennsylvania  
Garrett, Jace, Clemson University  
Gaudin, Germain, University of Freiburg  
Gaule, Patrick, Massachusetts Institute of Technology  
Gauthier, Jean-François, HEC Montréal  
Gavazzoni, Fede, BI Norwegian Business School  
Gayle, George-Levi, Washington University in St. Louis  
Ge, Shan, New York University  
Geelen, Thomas, Pennsylvania State University  
Gelman, Michael, University of Delaware  
Gelman, Michael, University of Delaware  
Geng, Xin, University of Miami  
Geng, Zhe, Fudan University  
Gentry, Matthew, Florida State University  
Georg, Co-Pierre, University of Cape Town  
Geraldès, Diogo, Utrecht University  
Gerarden, Todd, Cornell University  
Gerhart, Barry, University of Wisconsin–Madison  
Germonprez, Matt, University of Nebraska Omaha  
Gertsberg, Marina, University of Melbourne  
Gërçhani, Klarita, Vrije Universiteit Amsterdam  
Getmansky Sherman, Mila, University of Massachusetts Amherst  
Geva, Hilah, Tel Aviv University  
Geva, Tomer, Tel Aviv University  
Ghani, Tarek, Washington University in St. Louis  
Ghasemkhani, Hossein, University of Washington  
Ghate, Archis, University of Minnesota  
Ghent, Andra, University of Utah  
Ghiassi, Yashar, Erasmus University Rotterdam  
Ghili, Soheil, Yale University  
Giacoletti, Marco, University of Southern California  
Gianfrate, Gianfranco, EDHEC Business School  
Giannetti, Mariassunta, Stockholm School of Economics  
Giarratana, Marco, IE Business School  
Gibbons, Brian, Oregon State University  
Gider, Jasmin, Tilburg University  
Gijbrecchts, Joren, Universidade Católica Portuguesa Católica  
Gil, Ricard, University of Navarra  
Gil-Bazo, Javier, University Pompeu Fabra  
Gilbukh, Sophia, Baruch College  
Gillingham, Kenneth, Yale University  
Ginglinger, Edith, Paris Dauphine University  
Ginzburg, Boris, Universidad Carlos III de Madrid  
Giorcelli, Michela, University of California, Los Angeles  
Giraud-Carrier, Francois, Weber State University  
Giroux, Thomas, Center for Research in Economics and Statistics  
Gisbert, Josep, IE University  
Gissler, Stefan, Federal Reserve Board  
Giuntella, Osea, University of Pittsburgh  
Giustinelli, Pamela, Bocconi University  
Glaeser, Chloe, University of North Carolina at Chapel Hill  
Glaeser, Stephen, University of North Carolina at Chapel Hill  
Glancy, David, Board of Governors of the Federal Reserve System  
Gleбкин, Sergei, INSEAD  
Glennon, Britta, University of Pennsylvania  
Glikson, Ella, Bar-Ilan University  
Glossner, Simon, Board of Governors of the Federal Reserve System  
Glover, Brent, Carnegie Mellon University

- Gneezy, Ayelet, University of California, San Diego  
 Gnewuch, Ulrich, University of Passau  
 Godes, David, Johns Hopkins University  
 Godinho De Matos, Miguel, Universidade Católica Portuguesa Católica  
 Goedker, Katrin, Bocconi University  
 Goel, Milind, London Business School  
 Goerg, Sebastian, Technical University of Munich  
 Goerigk, Marc, University of Passau  
 Goetz, Daniel, University of Toronto  
 Gofman, Michael, University of Wisconsin–Madison  
 Goh, Joel, National University of Singapore  
 Gokcinar, Abdullah, The Gap Inc.  
 Gold, Anna, Vrije Universiteit Amsterdam  
 Goldberg, Linda, Federal Reserve Bank of New York  
 Goldberg, Samuel, Stanford University  
 Goldman, Nathan, North Carolina State University  
 Goldsman, Dave, Georgia Institute of Technology  
 Golez, Benjamin, University of Notre Dame  
 Goli, Ali, University of Washington  
 Golinski, Adam, University of York  
 Golman, Russell, Carnegie Mellon University  
 Golrezaei, Negin, Massachusetts Institute of Technology  
 Golubov, Andrey, University of Toronto  
 Gölz, Paul, Cornell University  
 Gomez Cram, Roberto, London Business School  
 Gomez Martinez, Jonathan, University of Southern California  
 Gómez, Andrés, University of Southern California  
 Gomez, Enrique, Temple University  
 Gómez, Jaime, University of La Rioja  
 Goncalves, Andrei, Ohio State University  
 Goncalves, Duarte, University College London  
 Goncharenko, Roman, KU Leuven  
 Gondhi, Naveen, INSEAD  
 Gong, Evelyn Xiao-Yue, Carnegie Mellon University  
 Gong, Guojin, University of Connecticut Stamford  
 Gong, Jie, University of Hong Kong  
 Gong, Jing, University of Virginia  
 Gong, Xiting, Chinese University of Hong Kong  
 Gong, Zheng, Shenzhen Finance Institute  
 González, Alessandra, Duke University  
 Goossens, Jorgo, Radboud University Nijmegen  
 Gopal, Manasa, Georgia Institute of Technology  
 Gopalakrishnan, Sanjith, McGill University  
 Gopalan, Yadav, University of Notre Dame  
 Goranova, Maria, University of Wisconsin–Milwaukee  
 Gordon, Grey, Federal Reserve Bank of Richmond  
 Gordon-Hecker, Tom, Ben-Gurion University of the Negev  
 Gormley, Todd, Washington University in St. Louis  
 Gormsen, Niels, University of Chicago  
 Gornall, Will, University of British Columbia  
 Gosling, Tom, London Business School  
 Gottardi, Piero, University of Essex  
 Götz, Martin, Deutsche Bundesbank  
 Gourier, Elise, Princeton University  
 Goyal, Amit, University of Lausanne  
 Goyal, Vineet, Columbia University  
 Grabner, Isabella, Vienna University of Economics and Business  
 Grabowski, David, Harvard Medical School  
 Graeber, Thomas, Harvard Business School  
 Graff Zivin, Joshua, University of California, San Diego  
 Granados, Nelson, Pepperdine University  
 Grand-Clément, Julien, HEC Paris  
 Grandi, Umberto, Institut de Recherche Informatique de Toulouse  
 Grant, Simon, Australian National University  
 Grasser, Robert, University of South Carolina  
 Gredil, Oleg, Tulane University  
 Green, Clifton, Emory University  
 Green, Jeremiah, Texas A&M University  
 Green, Paul, University of Texas at Austin  
 Greene, Daniel, Clemson University  
 Gregoire, Vincent, HEC Montréal  
 Gregor, Martin, Charles University  
 Greiner, Ben, Vienna University of Economics and Business  
 Greminger, Rafael P., Tilburg University  
 Grenet, Julien, Paris School of Economics  
 Grennan, Jillian, Emory University  
 Greve, Henrich, INSEAD  
 Grewal, Jody, University of Toronto  
 Grieco, Daniela, University of Milan  
 Grieder, Manuel, UniDistance Suisse  
 Griffin, Thomas, Villanova University  
 Grigas, Paul, University of California, Berkeley  
 Grigoris, Foti, University of Iowa  
 Grivol, Gustavo, New York University  
 Groh, Matthew, Northwestern University  
 Grohsjean, Thorsten, Ludwig Maximilian University of Munich  
 Gropper, Michael, University of Colorado Boulder  
 Gross, Daniel, Duke University  
 Gross, Tal, Boston University  
 Grosskopf, Brit, University of Exeter  
 Grubb, Michael, Boston College  
 Grunewald, Andreas, University of Bonn  
 Grunwald, Peter, Foundation for Dutch Scientific Research Institutes  
 Gu, Grace, University of Southern California  
 Gu, Jane, University of Connecticut  
 Guajardo, Jose, University of California, Berkeley  
 Guan, Yuyan, Nanyang Technological University  
 Gubler, Timothy, Brigham Young University  
 Guda, Harish, Arizona State University  
 Guecioueur, Ahmed, INSEAD  
 Guest, Nick, Cornell University  
 Guggenmos, Ryan, University of South Carolina

- Gui, George, Columbia University  
Gui, Luyi, University of California, Irvine  
Guilbeault, Douglas, University of California, Berkeley  
Guillen Alvarez, Pablo, University of Sydney  
Gulati, Piyush, INSEAD  
Gulen, Huseyin, Purdue University  
Guo, Fulin, University of Cambridge  
Guo, Hong, Arizona State University  
Guo, Hongye, University of Hong Kong  
Guo, Hui, University of Cincinnati  
Guo, Jerry, Frankfurt School  
Guo, Jiaqi, University of Birmingham  
Guo, Julian, Michigan State University  
Guo, Michael, Fordham University  
Guo, Sichen, Shanghai University of Finance and Economics  
Guo, Tong, Duke University  
Guo, Xiaojia, University of Maryland, College Park  
Guo, Xiaomeng, Hong Kong Polytechnic University  
Guo, Xitong, Harbin Institute of Technology  
Guo, Yaohui, University of Michigan  
Guo, Yuan, George Washington University  
Guo, Zhe, Fordham University  
Gupta, Abhinav, University of North Carolina at Chapel Hill  
Gupta, Atul, University of Pennsylvania  
Gupta, Deeksha, Carnegie Mellon University  
Gupta, Nandini, Indiana University  
Gupta, Neeraja, University of Richmond  
Gupta, Rahul, Georgetown University  
Gupta, Shivam, University of Nebraska  
Gupta, Swati, Massachusetts Institute of Technology  
Gürdal, Mehmet, Bogazici University  
Gurkan, Huseyin, ESMT Berlin  
Gustafson, Matthew, Pennsylvania State University  
Gutierrez, Cédric, Bocconi University  
Gutierrez, Emilio, Instituto Tecnológico Autónomo de México  
Gutsche, Gunnar, University of Kassel  
Gutt, Dominik, Erasmus University Rotterdam  
Guttman-Kenney, Benedict, Rice University  
Guzman, Jorge, Columbia University  
Hacamo, Isaac, Indiana University Bloomington  
Hae You, Ji, University of Memphis  
Haeckl, Simone, University of Stavanger  
Haegele, Ingrid, University of California, Berkeley  
Hagenberg, Thomas, Northwestern University  
Haggag, Kareem, University of California, Los Angeles  
Hagmann, David, The Hong Kong University of Science and Technology  
Hagstromer, Bjorn, Stockholm University  
Hahm, Dong Woo, University of Southern California  
Hajihashemi, Bitan, University of California, Davis  
Hakimov, Rustamdjan, University of Lausanne  
Haliassos, Michael, Goethe University  
Halim, Edward, Nanyang Technological University  
Halling, Michael, University of Luxembourg  
Hallman, Nicholas, University of Texas at Austin  
Ham, Charles, Indiana University Bloomington  
Hamilton, Russ, Southern Methodist University  
Hamilton, Barton, Washington University in St. Louis  
Hamilton, Michael, University of Pittsburgh  
Hamman, John, Florida State University  
Han, Brian, University of Illinois Urbana–Champaign  
Han, Jiequn, Flatiron Institute  
Han, Jungsuk, Seoul National University  
Han, Sang Pil, Arizona State University  
Han, Yufeng, University of North Carolina at Charlotte  
Han, Yuxuan, Hong Kong University of Science and Technology  
Hanaki, Nobuyuki, Osaka University  
Hand, John, University of North Carolina at Chapel Hill  
Hann, Rebecca, University of Maryland  
Hannah, Douglas, Boston University  
Hanousek, Jan, University of Memphis  
Hansen, Peter, Purdue University  
Hao, Jasmin, University of Hong Kong  
Haran, Uriel, Ben-Gurion University of the Negev  
Harbring, Christine, RWTH Aachen University  
Hardisty, David, University of British Columbia  
Harmon, Derek, University of Michigan  
Harre, Simon, Indiana University  
Harrington, Emma, University of Iowa  
Harris, Erica, Florida International University  
Harrison, David, University of Central Florida  
Harsha, Pavithra, IBM Thomas J. Watson Research Center  
Hartman-Glaser, Barney, University of California, Los Angeles  
Harutyunyan, Mushegh, Imperial College London  
Hasbrouck, Joel, New York University  
Hashim, Matthew, University of Arizona  
Haskell, William, National University of Singapore  
Haslag, Peter, Vanderbilt University  
Hasler, Michael, University of Neuchâtel  
Hastie, Reid, University of Chicago  
Hathaway, Brett, Brigham Young University  
Hauser, Oliver, University of Exeter  
Hausman, Naomi, National Bureau of Economic Research  
Havakhor, Taha, McGill University  
Haveman, Heather, University of California, Berkeley  
Haviv, Avery, University of Toronto  
Hawn, Olga, University of North Carolina at Chapel Hill  
He, Cheng, University of Wisconsin–Madison  
He, Chuan, University of Colorado Boulder  
He, Eryn Juan, University of Utah

- He, Haoran, Beijing Normal University  
 He, Jie, University of Georgia  
 He, Jing, University of Delaware  
 He, Jingyu, City University of Hong Kong  
 He, Kevin, University of Pennsylvania  
 He, Li, Erasmus University Rotterdam  
 He, Long, George Washington University  
 He, Qinglai, University of Wisconsin–Madison  
 He, Sherry, Michigan State University  
 He, Shu, University of Florida  
 He, Tony, Rutgers University  
 He, Xuedong, Chinese University of Hong Kong  
 He, Ying, University of Southern Denmark  
 He, Yumei, Tulane University  
 He, Zhiheng, Tsinghua University  
 Heater, John, University of Minnesota  
 Heath, Davidson, University of Utah  
 Hebert, Benjamin, Stanford University  
 Hebert, Camille, University of Toronto  
 Hedlund, Aaron, Purdue University  
 Heeb, Florian, Leibniz Institute for Financial Research  
 SAFE  
 Heese, Jonas, Harvard Business School  
 Heinle, Mirko, University of Pennsylvania  
 Heinz, Matthias, University of Cologne  
 Heitz, Amanda, Tulane University  
 Heitzman, Shane, University of Southern California  
 Helland, Eric, Claremont McKenna College  
 Hellmann, Thomas, University of Oxford  
 Helmers, Christian, Santa Clara University  
 Helmke, Anna, Vanderbilt University  
 Henderson, Brian, George Washington University  
 Heng, Yu Tse, University of Virginia  
 Hengel, Erin, Brunel University of London  
 Hennisz, Witold, University of Pennsylvania  
 Henkel, Joachim, Technical University of Munich  
 Henkel, Luca, University of Bonn  
 Hens, Thorsten, University of Zurich  
 Hensel, Lukas, Peking University  
 Hermosilla, Manuel, Johns Hopkins University  
 Hernando-Veciana, Angel, Universidad Carlos III  
 de Madrid  
 Herpfer, Christoph, Emory University  
 Hersh, Jonathan, Chapman University  
 Herskovic, Bernard, University of California, Los  
 Angeles  
 Herweg, Fabian, University of Bayreuth  
 Herz, Holger, University of Fribourg  
 Hett, Florian, Johannes Gutenberg University  
 Heursen, Lea, Humboldt University of Berlin  
 Hewitt, Max, University of Arizona  
 Heyerdahl-Larsen, Christian, BI Norwegian Business  
 School  
 Hidaji, Hooman, University of Calgary  
 Hiemann, Moritz, Bocconi University  
 Higgins, Sean, Northwestern University  
 Hilary, Gilles, Georgetown University  
 Hildebrand, Christian, University of Geneva  
 Hildreth, John, Cornell University  
 Hill, Robert, University of Graz  
 Hill, Ryan, Northwestern Regional Health Authority  
 Hillman, Amy, Arizona State University  
 Hilscher, Jens, University of California, Davis  
 Himmelstein, Mark, Fordham University  
 Hinds, Cory, Queen’s University  
 Hinnosaar, Marit, Collegio Carlo Alberto  
 Hiraiwa, Takuya, University of Maryland,  
 College Park  
 Hirshman, Samuel, Norwegian School of Economics  
 Ho, Paul, Federal Reserve Bank of Richmond  
 Ho, Yi Jen, Tulane University  
 Hoberg, Gerard, University of Southern California  
 Hoberg, Kai, Kühne Logistics University  
 Hoelzemann, Johannes, University of Toronto  
 Hoey, Sam, University of Luxembourg  
 Hoffmann, Manuel, Harvard Business School  
 Hofman, Boris, Bank for International Settlements  
 Hoga, Yannick, University of Duisburg-Essen  
 Holburn, Guy, University of Western Ontario  
 Hollenbeck, Brett, University of California, Los  
 Angeles  
 Hollstein, Fabian, Saarland University  
 Holm, Martin, University of Oslo  
 Holtz, David, University of California, Berkeley  
 Holz, Justin, University of Michigan  
 Holzhaecker, Martin, Michigan State University  
 Holzman, Eric, Ohio State University  
 Holzmann, Hajo, Philipps University of Marburg  
 Hong, Claire, Shanghai Advanced Institute of Finance  
 Hong, Jiyeon, George Mason University  
 Hong, Yige, Carnegie Mellon University  
 Hong, Yili, University of Miami  
 Ho-Nguyen, Nam, University of Sydney  
 Honka, Elisabeth, University of California,  
 Los Angeles  
 Honkanen, Pekka, University of Georgia  
 Hoopes, Jeffrey, University of North Carolina at  
 Chapel Hill  
 Hope, Ole-Kristian, University of Toronto  
 Hopkins, Justin, University of Virginia  
 Hördahl, Peter, Bank for International Settlements  
 Horenstein, Alex, University of Miami  
 Horny, Guillaume, Banque de France  
 Horton, John, Massachusetts Institute of Technology  
 Hosseini, Leila, University of Houston  
 Hotkar, Parshuram, Indian School of Business  
 Hou, Jinbo, Santa Clara University  
 Hou, Kewei, Ohio State University  
 Hou, Yun, Hong Kong University of Science and  
 Technology  
 Hougaard, Jens, University of Copenhagen  
 Hrdlicka, Christopher, University of Washington

- Hristakeva, Sylvia, Cornell University  
Hsieh, Ying-Ying, Imperial College London  
Hssaine, Chamsi, University of Southern California  
Hsu, Charles, Hong Kong University of Science and Technology  
Hsu, Po-Hsuan, National Tsing Hua University  
Hu, Allen, University of British Columbia  
Hu, Anran, University of Oxford  
Hu, Audrey, City University of Hong Kong  
Hu, Bin, University of Texas at Dallas  
Hu, Bo, George Mason University  
Hu, Edwin, New York University School of Law  
Hu, Feifang, George Washington University  
Hu, Guanglian, University of Sydney CAR  
Hu, Jiayin, Peking University  
Hu, Kejia, Oxford University  
Hu, Keri, University of Hong Kong  
Hu, Xiaowen, Southern Methodist University  
Hu, Xing, University of Hong Kong  
Hu, Xing, Tsinghua University  
Hu, Xiyang, Arizona State University  
Hu, Yichun, Cornell University  
Hu, Yifan, EPFL  
Hu, Yuchen, Stanford University  
Hu, Yue, Stanford University  
Hu, Yunzhi, University of North Carolina at Chapel Hill  
Hu, Zhaolin, Tongji University  
Hu, Zhenyu, National University of Singapore  
Hu, Zihan, Singapore Management University  
Hua, Xinyu, Hong Kong University of Science and Technology  
Huang, Allen, Hong Kong University of Science and Technology  
Huang, Ching-I, National Taiwan University  
Huang, Chong, University of California, Irvine  
Huang, Da, Northeastern University  
Huang, Dashan, Singapore Management University  
Huang, Dayong, University of North Carolina at Greensboro  
Huang, Ji, Chinese University of Hong Kong  
Huang, Jiekun, University of Illinois Urbana–Champaign  
Huang, Jin, New York University Shanghai  
Huang, Jing, Texas A&M University  
Huang, Jingkai, Zhejiang University  
Huang, Jing-Zhi, Pennsylvania State University  
Huang, June, University of Texas at Dallas  
Huang, Junfei, Chinese University of Hong Kong  
Huang, Justin, University of Michigan  
Huang, Kenneth, National University of Singapore  
Huang, Ke-Wei, National University of Singapore  
Huang, Michael, Baruch College  
Huang, Nina, University of Miami  
Huang, Peng, University of Maryland, College Park  
Huang, Qianqian, City University of Hong Kong  
Huang, Rachel, National Central University  
Huang, Rihuan, Chinese University of Hong Kong, Shenzhen  
Huang, Rong, Fudan University  
Huang, Ruidi, Southern Methodist University  
Huang, Shan, HKU Business School  
Huang, Shiyang, Hong Kong University  
Huang, Sterling, New York University Shanghai  
Huang, Tingliang, University of Tennessee  
Huang, Ximin, University of Minnesota  
Huang, Xing, Washington University in St. Louis  
Huang, Yi, Fudan University  
Huang, Yihong, Harvard University  
Huang, Yufeng, University of Rochester  
Huang, Zeqiong, Yale University  
Huang, Zhiyuan, Tongji University  
Huber, Christoph, Aalto University  
Huber, Martin, University of Fribourg  
Huddart, Steven, Pennsylvania State University  
Hudik, Marek, Prague University of Economics and Business  
Hudja, Stanton, Purdue University  
Huebner, Paul, Stockholm School of Economics  
Huether, Niklas, San Diego State University  
Huffman, David, University of Pittsburgh  
Hug, Flavia, ETH Zurich  
Hui, Kai Wai, University of Hong Kong  
Hui, Xiang, Washington University in St. Louis  
Hull, Peter, Brown University  
Hund, John, University of Georgia  
Hung, Mingyi, Hong Kong University of Science and Technology  
Hunold, Matthias, University of Siegen  
Hunter, Megan, Boston College  
Huo, Tianming, National University of Singapore  
Hur, Yun Young, George Mason University  
Hurley, Patrick, Northeastern University  
Hurst, Reuben, University of Maryland, College Park  
Hurtado, Augustin, University of Maryland  
Hutchison-Krupat, Jeremy, University of Cambridge  
Hutton, Irena, Florida State University  
Huysentruyt, Marieke, HEC Paris  
Hvide, Hans, University of Bergen  
Hviid, Morten, University of East Anglia  
Hwang, Byoung-Hyoun, Nanyang Technological University  
Hwang, Elina, University of Washington  
Hwang, Hyun, University of Texas at Austin  
Hwang, Woonam, University of Utah  
Hymer, Christina, University of Tennessee  
Hyndman, Kyle, University of Texas at Dallas  
Hyoduk, Shin, University of California, San Diego  
Hyun, Jay, University of Alberta  
Iancu, Dan, Stanford Graduate School of Business  
Ibragimov, Marat, Emory University  
Ibrahim, Rouba, University College London

- Ichihashi, Shota, Queen's University  
 Ichishashi, Shota, Queen's University  
 Ide, Enrique, IESE Business School  
 Igami, Mitsuru, Yale University  
 Ignatiadis, Nikolaos, University of Chicago  
 Ilhan, Emirhan, National University of Singapore  
 Iliev, Peter, Pennsylvania State University  
 Illanes, Gaston, Northwestern University  
 Imai, Taisuke, Osaka University  
 Imas, Alex, University of Chicago  
 Imdahl, Christina, Eindhoven University of Technology  
 Impink, Stephen, HEC Paris  
 Incekara Hafalir, Elif, University of Technology Sydney  
 Inesi, M., London Business School  
 Ingolfsson, Armann, University of Alberta  
 Inoue, Carlos, University of Illinois Urbana-Champaign  
 Intintoli, Vince, Clemson University  
 Ioannou, Ioannis, London Business School  
 Ion, Mihai, University of Arizona  
 Iori, Martina, Sant'Anna School of Advanced Studies  
 Iorio, Alessandro, Carnegie Mellon University  
 Ip, Edwin, Monash University  
 Iqbal, Aneel, Arizona State University  
 Iriberry, Nagore, Universidad del Pais Vasco  
 Irvine, Paul, Texas Christian University  
 Isaksson, Siri, Norwegian School  
 Iselin, Michael, University of Minnesota, Twin Cities  
 Ishihara, Akifumi, University of Tokyo  
 Ishihara, Masakazu, New York University  
 Israeli, Ayelet, Harvard Business School  
 Israelsen, Ryan, Michigan State University  
 Ivanov, Ivan, Federal Reserve Bank of Chicago  
 Ivković, Zoran, Michigan State University  
 Iyer, Krishnamurthy, University of Minnesota, Twin Cities  
 Izhakian, Yehuda, Baruch College  
 Jackwerth, Jens, University of Konstanz  
 Jacob, Martin, WHU-Otto Beisheim School of Management  
 Jacobsen, Stacey, Southern Methodist University  
 Jacqueminet, Anne, Bocconi University  
 Jacquillat, Alexandre, Massachusetts Institute of Technology  
 Jagadish, H. V., University of Michigan  
 Jago, Arthur, University of Washington Tacoma  
 Jagtenberg, Caroline, Vrije Universiteit Amsterdam  
 Jahani, Eaman, University of Maryland College Park  
 Jahan-Parvar, Mohammad, Federal Reserve Board  
 Jain, Aditya, Baruch College  
 Jain, Lalit, University of Washington  
 Jain, Nitish, London Business School  
 Jain, Tarun, Indian Institute of Management-Bangalore  
 Jalili, Monir, Bentley University  
 Jame, Russell, University of Kentucky  
 Janakiraman, Ramkumar, North Carolina State University  
 Jang, Kyoungseok, University of Milan  
 Jansen, Mark, University of Utah  
 Janssen, Maarten, University of Vienna  
 Jasin, Stefanus, University of Michigan  
 Jasova, Martina, Barnard College  
 Jeanneret, Alexandre, University of New South Wales  
 Jeffers, Jessica, HEC Paris  
 Jennings, Jared, Washington University in St. Louis  
 Jens, Candace, Tulane University  
 Jensen, Theis Ingerslev, Yale University  
 Jensen, Ulrich, Arizona State University  
 Jeon, Doh-Shin, Toulouse School of Economics  
 Jeon, Jihye, Boston University  
 Jerath, Kinshuk, Columbia University  
 Jeziorski, Przemyslaw, University of California, Berkeley  
 Jha, Manish, Georgia State University  
 Ji, Shaolin, Shandong University  
 Ji, Yan, Hong Kong University of Science and Technology  
 Ji, Yonghua, University of Alberta  
 Ji, Yuan, University of Texas at Arlington  
 Jia, Justin, University of Tennessee  
 Jia, Nan, University of Southern California  
 Jia, Ruizhe, Columbia University  
 Jia, Su, Cornell University  
 Jia, Xue, University of Melbourne  
 Jia, Yanwei, The Chinese University of Hong Kong  
 Jiang, Baojun, Washington University in St. Louis  
 Jiang, Erica, University of Southern California  
 Jiang, Feng, State University of New York at Buffalo  
 Jiang, George, University of Arizona  
 Jiang, Hao, Michigan State University  
 Jiang, Jiashuo, Hong Kong University of Science and Technology  
 Jiang, Li, Hong Kong Polytechnic University  
 Jiang, Lianglilang, Hong Kong Polytechnic University  
 Jiang, Lingqing, University of Essex  
 Jiang, Ruiwei, University of Michigan  
 Jiang, Rujun, Fudan University  
 Jiang, Sheila, University of Florida  
 Jiang, Shushu, National University of Singapore  
 Jiang, Wenxi, Chinese University of Hong Kong  
 Jiang, Xu, Duke University  
 Jiang, Yiming, Georgia Institute of Technology  
 Jiang, Zhaohui (Zoey), Carnegie Mellon University  
 Jiang, Zhengyang, Northwestern University  
 Jiang, Zhenling, University of Pennsylvania  
 Jiao, Chuanya, University of Science and Technology of China  
 Jiao, Peiran, Maastricht University  
 Jiao, Wen, Beijing Jiaotong University

- Jin, Billy, Cornell University  
Jin, Chen, National University of Singapore  
Jin, Dunhong, University of Hong Kong  
Jin, Fujie, Indiana University Bloomington  
Jin, Lawrence, Cornell University  
Jin, Wang, Stanford University  
Jindal, Pranav, Indian School of Business-Mohali  
Jing, Bing, Cheung Kong Graduate School of Business  
Jo, Ara, University of Bath  
Jo, Chanik, The Chinese University of Hong Kong  
Joffre, Anthony, Rice University  
Johnson, Bret, George Mason University  
Johnson, Garrett, Boston University  
Johnson, Joseph, University of South Carolina  
Johnson, Mark, Brigham Young University  
Johnson, Shane, Texas A&M University  
Johnson, Wayne, University of Utah  
Johnston, Drew, Meta Platforms Inc.  
Johnston, Sarah, University of Wisconsin–Madison  
Jola-Sanchez, Andres, Texas A&M University  
Jonasson, Jonas, Massachusetts Institute of Technology  
Jones, Andrew, Indiana University Bloomington  
Joo, Joonhwi, University of Texas at Dallas  
Joo, Mingyu, University of California, Riverside  
Joshi, Yogesh, University of Maryland  
Joslin, Scott, University of Southern California  
Jotikasthira, Chotibhak, Southern Methodist University  
Jourdan, Julien, HEC Paris  
Ju, Harang, Massachusetts Institute of Technology  
Ju, Yuan, University of York  
Jue-Rajasingh, Diana, Rice University  
Juliani, Elsa, INSEAD  
Julio, Brandon, University of Oregon  
Julliard, Christian, London School of Economics and Political Science  
Jung, Jaehwuen, Temple University  
Jung, Michael, University of Delaware  
Jung, Minah, New York University Stern School of Business  
Kabra, Ashish, University of Maryland, College Park  
Kachelmeier, Steve, University of Texas at Austin  
Kacperczyk, Olenka, London Business School  
Kadach, Igor, University of Navarra  
Kagan, Evgeny, Johns Hopkins University  
Kahale, Nabil, ESCP Business School  
Kaiser, Tim, University of Koblenz and Landau  
Kajackaite, Agne, University of Milan  
Kajaria-Montag, Harshita, Indiana University Bloomington  
Kakhbod, Ali, University of California, Berkeley  
Kalda, Ankit, Indiana University Bloomington  
Kalkanci, Basak, Georgia Institute of Technology  
Kalnina, Ilze, North Carolina State University  
Kaltenberg, Mary, Pace University  
Kalvit, Anand, Columbia University  
Kamalahmadi, Masoud, University of Miami  
Kamble, Vijay, University of Illinois Chicago  
Kamei, Kenju, Durham University  
Kammeyer-Mueller, John, University of Minnesota  
Kampkötter, Patrick, University of Tübingen  
Kan, Yu, University of Washington  
Kang, Hyo, Seoul National University  
Kang, Jung Koo, Harvard Business School  
Kang, Sukhun, University of California, Santa Barbara  
Kankanhalli, Gaurav, University of Pittsburgh  
Kankanhalli, Shreya, Cornell University  
Kannan, P.K., University of Maryland, College Park  
Kantak, Preetesh, Indiana University Bloomington  
Kanze, Dana, Georgetown University  
Kao, Jennifer, University of California, Los Angeles  
Kaplan, Zachary, Washington University in St. Louis  
Kapor, Adam, Princeton University  
Kaps, Christian, University of Pennsylvania  
Kar, Wreetabrata, State University of New York at Buffalo  
Karabulut, Yigitcan, Frankfurt School  
Karacaoglu, Nil, Northwestern University  
Karaduman, Ömer, Stanford University  
Karaesmen, Fikri, Koç University  
Karagozoglu, Emin, Bilkent University  
Karaman, Hülya, Lee Kong Chian School of Business  
Karanam, Aditya, University of Texas at Austin  
Karapetyan, Artashes, ESSEC Group  
Kardas, Michael, Northwestern University  
Karellaia, Natalia, INSEAD  
Kargar, Mahyar, University of Illinois Urbana–Champaign  
Karle, Heiko, Frankfurt School  
Karmegam, Sabari Rajan, George Mason University  
Karplus, Valerie, Carnegie Mellon University  
Kartal, Melis, Vienna University of Economics and Business  
Kartasheva, Anastasia, University of St. Gallen  
Karuna, Christo, Monash University  
Kash, Ian, University of Illinois Chicago  
Katic, Ivana, Georgetown University  
Kato, Takao, Colgate University  
Katsamakos, Evangelos, Fordham University  
Kaufmann, Marc, Central European University  
Kaul, Aseem, University of Minnesota, Twin Cities  
Kaul, Rupali, INSEAD  
Kaustia, Markku, Aalto University  
Kaviani, Mahsa, University of Delaware  
Kawaguchi, Kohei, Hong Kong University of Science and Technology  
Kaya, Ayca, University of Miami  
Kayis, Enis, Ozyegin University  
Kaynar, Nur, Cornell University  
Ke, Changxia, Max Planck Institute for Tax Law and Public Finance

- Ke, Rongzhu, Zhejiang University  
 Ke, T. Tony, Chinese University of Hong Kong  
 Kecskes, Ambrus, York University  
 Keeve, Tanja, Tilburg University  
 Keil, Jan, Indian School of Business  
 Keller, L. Robin, University of California, Irvine  
 Kelley, Eric, University of Arizona  
 Keloharju, Matti, Aalto University  
 Kemahlioglu-Ziya, Eda, North Carolina State University  
 Kemel, Emmanuel, HEC Paris  
 Kendall, Chad, University of Miami  
 Kepler, John, Stanford Graduate School of Business  
 Keppler, Samantha, University of Michigan  
 Kerimov, Süleyman, Stanford University  
 Kerkhof, Anna, Ifo Institute for Economic Research  
 Kerrissey, Michaela, Harvard T.H. Chan School of Public Health  
 Kerschbamer, Rudolf, University of Innsbruck  
 Keskin, Irem, Duke University  
 Kesten, Onur, University of Technology Sydney  
 Ketkar, Harshvardhan, University of Texas at Austin  
 Kettunen, Janne, George Washington University  
 Keum, Daniel, Columbia University  
 Keusch, Thomas, INSEAD  
 Keyvanshokoo, Esmaeil, Texas A&M University  
 Khanna, Poonam, University of Texas at San Antonio  
 Khapko, Mariana, University of Toronto  
 Khashabi, Pooyan, Ludwig Maximilian University of Munich  
 Khern-Am-Nuai, Warut, McGill University  
 Khessina, Olga, University of Illinois Urbana-Champaign  
 Khodakarami, Farnoosh, San Diego State University  
 Khorrami, Paymon, Imperial College London  
 Khwaja, Ahmed, University of Cambridge  
 Kiku, Dana, University of Illinois Urbana-Champaign  
 Kilduff, Gavin, New York University  
 Kilic, Mete, University of Southern California  
 Kim, Antino, Indiana University Bloomington  
 Kim, Byung-Cheol, University of Alabama  
 Kim, Cheon Mok (John), Chinese University of Hong Kong  
 Kim, Chul, Baruch College  
 Kim, Daehyun, University of Toronto  
 Kim, Do Yoon, Boston College  
 Kim, Eunhee, Baruch College  
 Kim, Hyunjin, INSEAD  
 Kim, Hyunseob, Federal Reserve Bank of Chicago  
 Kim, J. Daniel, University of Pennsylvania  
 Kim, Jae Bum, Lehigh University  
 Kim, Jeong Ho (John), Florida State University  
 Kim, Jeongbin, Florida State University  
 Kim, Jerry, Rutgers University  
 Kim, Jin Hyung, George Washington University  
 Kim, Jinhwan, Stanford Graduate School of Business  
 Kim, Jun Beom, Seoul National University  
 Kim, Minjae, Rice University  
 Kim, Minkyung, Carnegie Mellon University  
 Kim, Olivia, Harvard Business School  
 Kim, Sehoon, University of Florida  
 Kim, Sehwa, Columbia University  
 Kim, Seil, Baruch College  
 Kim, Seonghoon, Singapore Management University  
 Kim, Shawn, University of California, Berkeley  
 Kim, Soohun, Korea Advanced Institute of Science & Technology  
 Kim, Sunyoung, Monash University  
 Kim, Tongil "Ti", University of Texas at Dallas  
 Kim, Yewon, Stanford University  
 Kim, Yongjin, University of New Mexico  
 Kim, Yongtae, Santa Clara University  
 Kim, Youngsoo, Loyola University Chicago  
 Kim, Youngsoo, Texas Tech University  
 Kimbrough, Erik, Chapman University  
 Kinch, Michelle, Dartmouth College  
 Kini, Omesh, Georgia State University  
 Kircher, Tobias, Technical University of Munich  
 Kireyev, Pavel, INSEAD  
 Kirgios, Erika, University of Chicago  
 Kirk, Marcus, University of Florida  
 Kirshner, Samuel, University of New South Wales  
 Klapper, Helge, Purdue University  
 Klapper, Leora, World Bank  
 Klasa, Sandy, University of Arizona  
 Kleen, Onno, Erasmus University Rotterdam  
 Klein, April, New York University  
 Klein, Olga, Warwick Business School  
 Kleiner, Kristoph, Indiana University  
 Kleinnijenhuis, Alissa, Imperial College London  
 Klingler, Sven, BI Norwegian Business School  
 Klinowski, David, University of Pittsburgh  
 Klockmann, Victor, Julius-Maximilians-Universität Würzburg  
 Klusowski, Joowon, Yale University  
 Kneeland, Madeline, Babson College  
 Kniffin, Kevin, Cornell University  
 Knoepfle, Jan, Queen Mary University of London  
 Knott, Anne Marie, Washington University in St. Louis  
 Ko, Ga Young, University of Virginia  
 Kocak, Ozgecan, Emory University  
 Koch, Alexander, Aarhus University  
 Koch, Andrew, University of Pittsburgh  
 Kocher, Martin, University of Vienna  
 Koçyiğit, Çağıl, University of Luxembourg  
 Koester, Allison, Georgetown University  
 Koffi, Marlene, University of Toronto  
 Kogan, Shimon, Reichman University  
 Koh, Boon Han, University of Exeter  
 Koh, Tat Koon, Hong Kong University of Science and Technology

- Koharki, Kevin, Purdue University  
Kojima, Fuhito, University of Tokyo  
Kolasinski, Adam, Texas A&M University  
Kölbel, Julian, University of St. Gallen  
Kolev, Julian, U.S. Patent and Trademark Office  
Komiya, Junpei, New York University  
Kong, Guangwen, Temple University  
Kong, Xinyao, University of Texas at Dallas  
König-Kersting, Christian, University of Innsbruck  
Koning, Rembrand, Harvard Business School  
Konstantinidi, Theodosia, City, University of London  
Koo, Wesley, Johns Hopkins University  
Koonce, Lisa, University of Texas at Austin  
Koont, Naz, Stanford University  
Kopanyi-Peuker, Anita, Radboud University Nijmegen  
Kopytov, Alexandr, University of Rochester  
Korajczyk, Robert, Northwestern University  
Korgaonkar, Sanket, University of Virginia  
Korniotis, George, University of Miami  
Kornish, Laura, University of Colorado Boulder  
Korpeoglu, C. Gizem, Eindhoven University of Technology  
Körpeoğlu, Ersin, University College London  
Korteweg, Arthur, Stanford University  
Kosova, Renata, Imperial College London  
Kostami, Vasiliki, HEC Paris  
Köster, Mats, Central European University  
Kosyakova, Tetyana, Frankfurt School  
Kou, Steven, Boston University  
Kouwenberg, Roy, Mahidol University  
Kovach, Matthew, Purdue University  
Kowaleski, Zach, University of Texas at Austin  
Kowalski, Alexander, Cornell University  
Kozak, Serhiy, University of Maryland, College Park  
Kozhan, Roman, University of Warwick  
Kraft, Pepa, HEC Paris  
Kraft, Tim, North Carolina State University  
Krajbich, Ian, University of California, Los Angeles  
Kräkel, Matthias, University of Bonn  
Kravet, Todd, University of Connecticut  
Krefeld-Schwalb, Antonia, Erasmus University Rotterdam  
Kremens, Lukas, University of Washington  
Kremer, Mirko, Frankfurt School  
Krepely Pool, Veronika, Vanderbilt University  
Kretschmer, Tobias, Ludwig Maximilian University of Munich  
Krieger, Joshua, Harvard Business School  
Krijestorac, Haris, HEC Paris  
Krimmel, Jacob, Federal Reserve Board  
Krishnamoorthy, Anand, University of Central Florida  
Kroer, Christian, Columbia University  
Kroll, Stephan, Colorado State University  
Kronlund, Mathias, University of Illinois Urbana–Champaign  
Kroos, Peter, University of Amsterdam  
Krueger, Joachim, Brown University  
Krueger, Philipp, University of Geneva  
Kruger, Samuel, University of Texas at Austin  
Krumer, Alex, University of St. Gallen  
Krupa, Jake, Tulane University  
Kruse, Douglas, Rutgers University  
Kruttl (Iu), Mathias, Indiana University Bloomington  
Kruttl, Mathias, Federal Reserve Board of Governors  
Kryscynski, David, University of Michigan  
Kshatriya, Anil, ESSEC Business School  
Kuang, Jason, Georgia Institute of Technology  
Kuang, Yu Flora, University of Melbourne  
Kubic, Matt, University of Texas at Austin  
Kucukgul, Can, Rutgers University  
Kudesia, Ravi, Temple University  
Kuhn, Michael, University of Oregon  
Kuiper, Alex, University of Amsterdam  
Kulkarni, Nirupama, CAFRAL (Reserve Bank of India)  
Kumar, Amit, University of Texas at Austin  
Kumar, Anuj, University of Florida  
Kumar, Madhav, Massachusetts Institute of Technology  
Kumar, Nanda, University of Texas at Dallas  
Kumar, Praveen, University of Houston  
Kummer, Michael, NOVA University Lisbon  
Kuncl, Martin, Bank of Canada  
Kundu, Amrita, Georgetown University  
Kundu, Santana, University of Mannheim  
Kundu, Shohini, University of California, Los Angeles  
Künneke, Judith, Tilburg University  
Kuong, John Chi-Fong, Chinese University of Hong Kong  
Kuppuswamy, Venkat, Northeastern University  
Kushwaha, Tarun, University of Wisconsin–Madison  
Kusterer, David, Erasmus University Rotterdam  
Kuusela, Pasi, University of Groningen  
Kwan, Alan, University of Hong Kong  
Kwon, Caleb, University of Texas at Austin  
Kwon, Hyeokkoo Eric, Nanyang Technological University  
Kwon, Spencer, Harvard University  
Kyle, Margaret, Mines Paris–PSL  
Kyung, Nakyung, National University of Singapore  
La Forgia, Ambar, University of California, Berkeley  
Labro, Eva, University of North Carolina at Chapel Hill  
Lacetera, Nicola, Università di Bologna  
Lachowska, Marta, W. E. Upjohn Institute for Employment Research  
Ladika, Tomislav, University of Amsterdam  
Laeven, Luc, European Central Bank  
Lafky, Jonathan, Carleton College

- Lagaras, Spyridon, University of Illinois Urbana–Champaign
- Lagzi, Saman, University of North Carolina at Chapel Hill
- Lagziel, David, Ben-Gurion University of the Negev
- Lai, Guoming, University of Texas at Austin
- Laitenberger, Ulrich, Tilburg University
- Lakhani, Karim, Harvard Business School
- Lalor, John, University of Notre Dame
- Lam, H. Tai, University of California, Los Angeles
- Lam, Wynne, University of Edinburgh
- Lam, Yu Ching, Bocconi University
- Lamberson, P.J., University of California, Los Angeles
- Lambert, Nicolas, University of Southern California
- Lambert, Peter John, London School of Economics and Political Science
- Lambert, Thomas, Erasmus University
- Lamoreaux, Phil, Arizona State University
- Lan, Yingchao, University of Nebraska–Lincoln
- Lanahan, Lauren, University of Oregon
- Landis, Blaine, University College London
- Landry, Peter, University of Toronto
- Lane, Jacqueline, Harvard University
- Lane, Tom, Newcastle University
- Lang, Matthias, Ludwig Maximilian University of Munich
- Langberg, Nisan, Tel Aviv University
- Laouenan, Morgane, Panthéon-Sorbonne University
- Larocque, Stephannie, University of Notre Dame
- Larrick, Richard, Duke University
- Lasio, Laura, European Commission Joint Research Centre
- Lassance, Nathan, UCLouvain
- Lau, Morten, Durham University
- Laudenbach, Christine, Leibniz Institute for Financial Research SAFE
- Lauga, Dominique, University of Cambridge
- Lauinger, Dirk, Swiss Federal Technology Institute of Lausanne
- Laureiro-Martinez, Daniella, ETH Zurich
- Laurion, Henry, University of Colorado Boulder
- Lavery, Paul, University of Glasgow
- Law, Kelvin, Nanyang Technological University
- Lawrence, Megan, Harvard Business School
- Lawson, Asher, INSEAD
- Lazarus, Eben, University of California, Berkeley
- Lazrak, Ali, University of British Columbia
- Le Mens, Gael, Università Pompeu Fabra
- Le Moglie, Marco, Università Cattolica del Sacro Cuore
- Le, Anthony, Columbia University
- Lebovitz, Sarah, University of Virginia
- Leder-Luis, Jetson, Boston University
- Lee, Seung, University of Southern Denmark
- Lee, Brian, Pennsylvania State University
- Lee, Charles, Stanford University
- Lee, Hae Kang, Korea University
- Lee, Heeseung Andrew, University of Texas at Dallas
- Lee, Honggi, University of New Hampshire
- Lee, Hyun Seok (Huck), Korea University
- Lee, Ilbin, University of Alberta
- Lee, Jaesun, Tongji University
- Lee, Jeongmin "Mina", Board of Governors of the Federal Reserve System
- Lee, Jongsub, Seoul National University
- Lee, Josh, Brigham Young University
- Lee, Kari, Rutgers University
- Lee, Kyuhan, Arizona State University
- Lee, Lian Fen, Boston College
- Lee, Mi Hyun, Northwestern University
- Lee, Michael, Federal Reserve Bank New York
- Lee, Narae, Korea Advanced Institute of Science & Technology
- Lee, Saerom (Ronnie), University of Pennsylvania
- Lee, Samuel, Santa Clara University
- Lee, Shun-Yang, Northeastern University
- Lee, Stephanie, University of Washington
- Lee, Sunkee, Carnegie Mellon University
- Lee, Suzanne, Georgia Institute of Technology
- Lee, Wee Kiat, Nanyang Technological University
- Lee, Yong Suk, Stanford University
- Lee, Yonghoon, Hong Kong University of Science and Technology
- Lee, Young Jin, University of Denver
- Lees, Jeffrey, Princeton University
- Lefouili, Yassine, Toulouse School of Economics
- Lefrere, Vincent, Institut Mines-Télécom Business School
- Leganza, Jonathan, Clemson University
- Lehar, Alfred, University of Calgary
- Lehman, David, University of Virginia
- Lei, Lijun (Gillian), University of North Carolina at Charlotte
- Lei, Murray, Queen's University
- Lei, Xiao, University of Hong Kong
- Lei, Ying, Peking University
- Lei, Zhanfei, University of Massachusetts Amherst
- Leibbrandt, Andreas, Monash University
- Leiby, Justin, University of Illinois Urbana–Champaign
- Lekwijit, Suparerk, Arizona State University
- Lemmens, Aurelie, Erasmus University Rotterdam
- Leng, Yan, University of Texas at Austin
- Lenox, Michael, University of Virginia
- Leombroni, Matteo, Boston College
- Leonard, Greg, University of North Carolina at Chapel Hill
- Leone, Andrew, Northwestern University
- Leonello, Agnese, European Central Bank
- Lerman, Alina, University of Connecticut
- Letina, Igor, University of Bern

- Leung, Alvin Chung Man, City University of Hong Kong  
Leung, Ming, University of California, Irvine  
Levine, Julia, Johns Hopkins University  
Levine, Oliver, University of Wisconsin–Madison  
Levine, Ross, Stanford University  
Levine, Sheen, Independent Researcher  
Levy, Antoine, University of California, Berkeley  
Levy, Ro’Ee, Tel-Aviv University  
Lewandowski, Michal, Warsaw School of Economics  
Lewellen, Katharina, Dartmouth College  
Lewis, Ben, Brigham Young University  
Lewis, Joshua, University of Pennsylvania  
Lewis, Matthew, Clemson University  
Lewis, Ryan, University of Colorado Boulder  
Lewis-Western, Melissa, Brigham Young University  
Leyaouanq, Yves, Polytechnic Institute of Paris  
Leyden, Benjamin, Cornell University  
Leymarie, Jeremy, EDHEC Business School  
L’Haridon, Olivier, University of Rennes 1  
Li, Alice, Ohio State University  
Li, Andrew, Carnegie Mellon University  
Li, Anran, Chinese University of Hong Kong  
Li, Ashlee, Georgia Institute of Technology  
Li, Bin, Vanderbilt University  
Li, Bo, Tsinghua University  
Li, Cha, University of Texas at Austin  
Li, Chan, University of Kansas  
Li, Chen, Erasmus University Rotterdam  
Li, Chenghuai, Duke University  
Li, Cuihong, University of Connecticut  
Li, Dan, Chinese University of Hong Kong, Shenzhen  
Li, Dongmei, University of South Carolina  
Li, Edward, Baruch College  
Li, Feng, Shanghai Advanced Institute of Finance  
Li, Frank, Singapore Management University  
Li, Frank, University of Western Ontario  
Li, Hannah, Columbia University  
Li, Hanzhe, University of Hong Kong  
Li, He, Clemson University  
Li, Hui, HKU Business School  
Li, Huiyu, Federal Reserve Bank San Francisco  
Li, J. Frank, University of British Columbia  
Li, Jay, University of North Carolina at Greensboro  
Li, Jiacui, University of Utah  
Li, Jiajin, University of British Columbia  
Li, Jian (Jane), Columbia University  
Li, Jianpei, University of International Business and Economics  
Li, Jiaqi, Bank of Canada  
Li, Jiasun, George Mason University  
Li, Jie, University of Macau  
Li, Jin, University of Hong Kong  
Li, Jing, University of Hong Kong  
Li, Jonathan, University of Ottawa  
Li, Jun, University of Texas at Dallas  
Li, Kai, Peking University  
Li, Kai, Macquarie University  
Li, Kai, University of British Columbia  
Li, Kathleen, University of Texas at Austin  
Li, Ken, McMaster University  
Li, Kevin, Santa Clara University  
Li, Krista, Indiana University  
Li, Lingfei, Chinese University of Hong Kong  
Li, Meng, University of Houston  
Li, Menglong, City University of Hong Kong  
Li, Mengmeng, EPFL  
Li, Michael Lingzhi, Harvard Business School  
Li, Minming, City University of Hong Kong  
Li, Nan, University of Minnesota  
Li, Ningzhong, University of Texas at Dallas  
Li, Pan, Georgia Institute of Technology  
Li, Rachel, U.S. Securities and Exchange Commission  
Li, Rong, Syracuse University  
Li, Shelley, University of Southern California  
Li, Shuangning, University of Chicago  
Li, Shukai, Northwestern University  
Li, Simin, Tulane University  
Li, Sophia Zhengzi, Rutgers University  
Li, Tao, University of Florida  
Li, Ting, Erasmus University Rotterdam  
Li, Wenhao, University of Southern California  
Li, Xi, University of Hong Kong  
Li, Xi, London School of Economics and political Science  
Li, Xi, University of Reading  
Li, Xia, London Business School  
Li, Xiaobo, National University of Singapore  
Li, Xiaocheng, Imperial College London  
Li, Xilin, University of Chicago  
Li, Xing, Peking University  
Li, Xinlei, University of California, Davis  
Li, Xitong, HEC Paris  
Li, Xiuping, National University of Singapore  
Li, Yang, Western University  
Li, Yao, Southern University of Science and Technology  
Li, Ye, University of Washington  
Li, Yi, Federal Reserve Board  
Li, Yifu, University of Science and Technology of China  
Li, Yinghua, Arizona State University  
Li, Yiwen, Villanova University  
Li, Yuanchen, Tongji University  
Li, Yue, University of California, Irvine  
Li, Yuexing, Johns Hopkins University  
Li, Zhao, New York University  
Li, Zhepeng, University of Hong Kong  
Li, Zhuoxin (Allen), University of Wisconsin–Madison  
Lian, Zhen, Yale University  
Liang, Bing, University of Massachusetts Amherst

- Liang, Chen, University of Connecticut  
 Liang, Chuchu, University of California, Irvine  
 Liang, Pierre Jinghong, Carnegie Mellon University  
 Liang, Xinyu, INSEAD  
 Liang, Yitian (Sky), Tsinghua University  
 Liang, Yucheng, Carnegie Mellon University  
 Liao, Chenxi, The Chinese University of Hong Kong  
 Liao, Guanmin, Renmin University of China  
 Liao, Yuan, Rutgers University  
 Libby, Theresa, University of Waterloo  
 Libgober, Jonathan, University of Southern California  
 Lidbetter, Thomas, Rutgers University  
 Lieberman, Alicea, University of California, Los Angeles  
 Light, Bar, Stanford University  
 Lim, Jong Myeong, Miami Herbert Business School  
 Lim, Stanley, Michigan State University  
 Lin, Chen-An, Purdue University  
 Lin, Danmo, University of Warwick  
 Lin, Leming, University of Pittsburgh  
 Lin, Luca, State University of New York at Buffalo  
 Lin, Meichun, Singapore Management University  
 Lin, Mingfeng, Georgia Institute of Technology  
 Lin, Qian, Wuhan University  
 Lin, Qihang, University of Iowa  
 Lin, Song, Hong Kong University of Science and Technology  
 Lin, Tesary, Boston University  
 Lin, Tse-Chun, University of Hong Kong  
 Lin, Wenwei, University of Minnesota, Twin Cities  
 Lin, Wilson, Santa Clara University  
 Lin, Xiaoji, University of Minnesota  
 Lin, Yifan, Georgia Institute of Technology  
 Lin, Yu-Kai, Georgia State University  
 Lin, Yupeng, National University of Singapore  
 Lin, Zhijie, Tsinghua University  
 Linardi, Sera, University of Pittsburgh  
 Lindsey, Bradley, Utah State University  
 Linos, Elizabeth, University of California, Berkeley  
 Lins, Karl, University of Utah  
 Lisic, Ling, Virginia Polytechnic Institute and State University  
 Liski, Matti, Aalto University  
 Litov, Lubomir, University of Oklahoma  
 Litwin, Ashley, University of Pennsylvania  
 Liu, Baixiao, Peking University  
 Liu, Betty, Indiana University Bloomington  
 Liu, Che-Wei, Arizona State University  
 Liu, Christopher, University of Oregon  
 Liu, Chuanren, University of Tennessee  
 Liu, Crocker, Cornell University  
 Liu, De, University of Minnesota, Twin Cities  
 Liu, Elain, University of Houston  
 Liu, Guangwu, City University of Hong Kong  
 Liu, Haibo, Keck Graduate Institute  
 Liu, Hong, Washington University in St. Louis  
 Liu, Jane, Peking University  
 Liu, Jia, Hong Kong University of Science and Technology  
 Liu, Jiarui, Leonard N. Stern School of Business  
 Liu, Jiayi, Virginia Polytechnic Institute and State University  
 Liu, Jin, New York University  
 Liu, Jingchen, Renmin University of China  
 Liu, Jinyu, University of International Business and Economics  
 Liu, Laura Xiaolei, Peking University  
 Liu, Lisa, Columbia University  
 Liu, Lu, University of Pennsylvania  
 Liu, Meng, Washington University in St. Louis  
 Liu, Miao, University of Chicago  
 Liu, Nan, Boston College  
 Liu, Peng, University of Essex  
 Liu, Qian, Hong Kong University of Science and Technology  
 Liu, Qihong, University of Oklahoma  
 Liu, Sheng, University of Toronto  
 Liu, Tim, University of Utah  
 Liu, Ting, Stony Brook University  
 Liu, Tingting, University of Tennessee, Knoxville  
 Liu, Tong, Massachusetts Institute of Technology  
 Liu, Wendy, University of California, San Diego  
 Liu, Xi, Miami University  
 Liu, Xiao, New York University  
 Liu, Xiaofeng, Baruch College  
 Liu, Xing, Tsinghua University  
 Liu, Yang, University of Hong Kong  
 Liu, Yi, University of Wisconsin–Madison  
 Liu, Yibin, National University of Singapore  
 Liu, Yukun, University of Rochester  
 Liu, Zack, University of Houston  
 Liu, Zekun, New York University Stern School of Business  
 Liu, Zhe, Imperial College London  
 Liu, Zhenqi (Jessie), Johns Hopkins University  
 Liu, Zhenxun, Aarhus University  
 Liu, Zhixin, University of Michigan  
 Liu, Zijian, Leonard N. Stern School of Business  
 Livdan, Dmitry, University of California, Berkeley  
 Llanes, Gaston, Pontifical Catholic University of Chile  
 Lo, Alvis, Boston College  
 Lo, Irene, Stanford University  
 Lo, Venus, City University of Hong Kong  
 Lock, Brandon, Baruch College  
 Loertscher, Simon, University of Melbourne  
 Loewenstein, George, Carnegie Mellon University  
 Loewenstein, Mark, University of Maryland  
 Loftus, Serena, Kent State University  
 Lohse, Tim, Berlin School of Economics and Law  
 Lombardi Yohn, Teri, Emory University  
 Long, Fei, Columbia University  
 Long, Xiaoyang, University of Wisconsin–Madison

- Lopalo, Melissa, Montana State University  
Lopez, Paula, Queen's University  
Lopez-Lira, Alejandro, University of Florida  
Lou, Bowen, University of Southern California  
Lou, Yun, Singapore Management University  
Loualiche, Erik, University of Minnesota  
Loudis, Johnathan, University of Notre Dame  
Louis, Henock, Pennsylvania State University  
Loumiotis, Maria, University of Texas at Dallas  
Lourenço, Sofia, Lisbon School of Economics and Management  
Lovett, Mitchell, University of Rochester  
Low, Angie, Nanyang Technological University  
Lowery, J., University of Texas, Austin  
Lowrey, John, Northeastern University  
Lowry, Michelle, Drexel University  
Lozano, Lina, New York University Abu Dhabi  
Lu, Andrea, University of Melbourne  
Lu, Hai, University of Toronto  
Lu, Haibing, Santa Clara University  
Lu, Haihao, University of Chicago  
Lu, Jino, University of Southern California  
Lu, Junwei, Harvard University  
Lu, Lei, University of Manitoba  
Lu, Miao, Boston College  
Lu, Michelle, China Europe International Business School  
Lu, Runjing, University of Toronto  
Lu, Shijie, University of Notre Dame  
Lu, Shirley, Harvard Business School  
Lu, Tao, University of Connecticut  
Lu, Tian, Arizona State University  
Lu, Tong, University of Houston  
Lu, Wei, University of Toronto  
Lu, Wentao, Johns Hopkins University  
Lu, Xiaomeng, Fudan University  
Lu, Xu, University of Washington  
Lu, Xun, Chinese University of Hong Kong  
Lu, Yao, Cornell University  
Lu, Yao, Tsinghua University  
Lu, Ye, City University of Hong Kong  
Lu, Yixin, George Washington University  
Lu, Zhuoran, Fudan University  
Luca, Michael, Johns Hopkins University  
Luck, Stephan, Federal Reserve Bank of New York  
Luehrmann, Melanie, University of London  
Luflade, Margaux, University of Pennsylvania  
Lugovoi, Ivan, Kühne Logistics University  
Luneva, Irina, New York University  
Luo, Bowen, University of Houston  
Luo, Danqi, University of California, San Diego  
Luo, Ding, City University of Hong Kong  
Luo, Hong, University of Toronto  
Luo, Jiao, University of Minnesota  
Luo, Mei, Tsinghua University  
Luo, Qi, University of Iowa  
Luo, Sirong, Shanghai University of Finance and Economics  
Luo, Xueming, Temple University  
Luo, Yao, University of Toronto  
Luo, Yiyun, University of North Carolina at Chapel Hill  
Lyandres, Evgeny, Tel Aviv University  
Lykouris, Thodoris, Massachusetts Institute of Technology  
Lyle, Matthew, Emory University  
Lynch, Daniel, University of Wisconsin–Madison  
Lynch-Levy, Bradford, University of Chicago  
Lyon, Thomas, University of Michigan  
Lyonnet, Victor, University of Michigan  
Lyons, Liz, University of California, San Diego  
Lysyakov, Mikhail, University of Maryland, College Park  
Lyu, Guodong, Hong Kong University of Science and Technology  
Ma, Albert, Boston University  
Ma, Angela, Boston College  
Ma, Chicheng, University of Hong Kong  
Ma, Hao, Queen Mary University of London  
Ma, Hongyao, Columbia University  
Ma, Joyce, Duke University  
Ma, Linlin, Peking University  
Ma, Liye, University of Maryland, College Park  
Ma, Mark, University of Pittsburgh  
Ma, Wenting, University of Massachusetts Amherst  
Ma, Will, Columbia University  
Ma, Xiaorong, University of Macau  
Ma, Xinjie, Temple University  
Ma, Yiming, Columbia University  
Ma, Yueran, University of Chicago  
Ma, Yueyuan, University of California, Santa Barbara  
Maas, Victor, University of Amsterdam  
Maass, Kayse, Northeastern University  
Macciocchi, Daniele, University of Miami  
Macgarvie, Megan, Boston University  
Macher, Jeffrey, Georgetown University  
Macis, Mario, Johns Hopkins University  
Mackey, Jeraul, McGill University  
Madio, Leonardo, University of Padova  
Maffett, Mark, University of Miami  
Maglio, Sam, University of Toronto  
Mahieux, Lucas, Tilburg University  
Mahlendorf, Matthias, Frankfurt School  
Mai, Yunke, University of Kentucky  
Maicas Lopez, Juan Pablo, CUNEF University  
Maines, Laureen, Indiana University  
Maini, Luca, Harvard Medical School  
Maio, Paulo, Hanken School of Economics  
Majerczyk, Michael, Georgia State University  
Majors, Tracie, University of Southern California  
Mak, Ho-Yin, Georgetown University  
Mak, Vincent, University of Cambridge

- Makhdoumi, Ali, Duke University  
 Makridis, Christos, Stanford University  
 Maksimovic, Vojislav, University of Maryland, College Park  
 Malamud, Semyon, EPFL  
 Malekian, Azarakhsh, University of Toronto  
 Malenko, Andrey, Boston College  
 Malik, Nikhil, University of Southern California  
 Malik, Sara, University of Utah  
 Malikov, George, University of Western Ontario  
 Malkoc, Selin, Ohio State University  
 Mallipeddi, Rakesh, Ohio State University  
 Mamadehussene, Samir, University of Texas at Dallas  
 Mamaghani, Fariba, Tulane University  
 Manchiraju, Hariom, Indian School of Business  
 Manconi, Alberto, Bocconi University  
 Mandel, Antoine, Panthéon-Sorbonne University  
 Manela, Asaf, Washington University in St. Louis  
 Mang, Audrey, Massachusetts Institute of Technology  
 Mani, Ankur, University of Minnesota  
 Mani, Vidya, University of Virginia  
 Mankad, Shawn, North Carolina State University  
 Manso, Gustavo, University of California, Berkeley  
 Mantegazza, Giacomo, Stanford Graduate School of Business  
 Mantovani, Andrea, Toulouse Business School  
 Manzoor, Emaad, Cornell University  
 Mao, Chengfeng, Massachusetts Institute of Technology  
 Mao, Connie, Temple University  
 Mao, Xiaojie, Tsinghua University  
 Mao, Yifei, Cornell University  
 Maoret, Massimo, University of Navarra  
 Marandi, Ahmadreza, Eindhoven University of Technology  
 Marazzina, Daniele, Politecnico di Milano  
 Marchetti, Arianna, London Business School  
 Marciukaityte, Dalia, Illinois State University  
 Mariadassou, Shwetha, Erasmus University Rotterdam  
 Mariathan, Mike, KU Leuven  
 Marinesi, Simone, ESCP Business School =  
 Marinoni, Astrid, Georgia Institute of Technology  
 Mariona, Segu, CY Cergy Paris University  
 Markakis, Mihalis, IESE Business School  
 Markou, Panos, University of Virginia  
 Markov, Stanimir, University of Texas at Dallas  
 Markus, Stanislav, University of South Carolina  
 Markussen, Thomas, University of Copenhagen  
 Marqués-Ibáñez, David, European Central Bank  
 Marshall, Nathan, University of Colorado Boulder  
 Marta, Thomas, Wilfrid Laurier University  
 Martagan, Tugce, Eindhoven University of Technology  
 Martens, Tim, Bocconi University  
 Marti, Chitra, New York University Stern School of Business  
 Marti, Emilio, Erasmus University Rotterdam  
 Martin, Daniel, University of California, Santa Barbara  
 Martin, Kirsten, University of Notre Dame  
 Martin, Melissa, University of Illinois Chicago  
 Martin, Patrick, University of Pittsburgh  
 Martin, Sebastien, Northwestern University  
 Martin, Thorsten, Frankfurt School  
 Martineau, Charles, University of Toronto  
 Martinez, Marta Troya, New Economic School  
 Martinez-Jerez, F. Asis, University of Notre Dame  
 Martins, Sara, INESC TEC  
 Martinsson, Gustav, Stockholm University  
 Martin-Utrera, Alberto, Iowa State University  
 Masclans, Roger, Duke University  
 Maselli, Alfonso, University of Pennsylvania  
 Maskara, Pankaj, Nova Southeastern University  
 Maslach, David, Florida State University  
 Massa, Massimo, INSEAD  
 Massoni, Sébastien, Panthéon-Sorbonne University  
 Masulis, Ronald, University of New South Wales  
 Mateu, Guillermo, Burgundy School of Business  
 Matsubayashi, Nobuo, Tokyo University of Science  
 Matsuno, Shunsuke, Columbia University  
 Matthies, Ben, University of Notre Dame  
 Mattsson, Martin, National University of Singapore  
 Maturana, Gonzalo, Emory University  
 Maurin, Vincent, HEC Paris  
 Maxwell, John, Indiana University  
 Maxwell, Richard, University of North Carolina at Chapel Hill  
 Mayer, Simon, Carnegie Mellon University  
 Mayhew, Brian, University of Wisconsin–Madison  
 Mayo, Anna, Carnegie Mellon University  
 Mayordomo, Sergio, Banco de España  
 Mayya, Raveesh, Leonard N. Stern School of Business  
 Mayzlin, Dina, Yale University  
 Mazur, Laurel, University of Notre Dame  
 Mccarthy, Daniel, University of Maryland, College Park  
 Mcclure, Charles, University of Chicago  
 Mcconnell, John, Purdue University  
 Mcdevitt, Ryan, University of Rochester  
 Mcdonnell, Mary-Hunter, Georgetown University  
 Mcelheran, Kristina, University of Toronto  
 Mcgranaghan, Matthew, Cornell University  
 Mcinnis, John, University of Texas at Austin  
 McMahan, Michael, University of Oxford  
 Medappa, Poonacha, Tilburg University  
 Medeiros, Marcelo, Pontifical Catholic University of Rio de Janeiro  
 Medina, Paolina, University of Houston  
 Meeuwis, Maarten, Washington University in St. Louis

- Megalokonomou, Rigissa, Monash University  
Megginson, William, University of Oklahoma  
Meggiorin, Katia, New York University Stern School of Business  
Mehr, Katie, University of Alberta  
Mehra, Rajnish, Arizona State University  
Mehrotra, Mili, University of Illinois Urbana–Champaign  
Mehta, Mihir, University of Michigan  
Mehta, Ravi, University of Illinois Urbana–Champaign  
Mehta, Ruta, University of Illinois Urbana–Champaign  
Mei, Danqing, Cheung Kong Graduate School of Business  
Meier, Jean-Marie, University of Texas at Dallas  
Meisner, Vincent, Technical University of Berlin  
Meissner, Thomas, Maastricht University  
Melnik, Valentyna, University of New South Wales  
Meloso, Debrah, Toulouse Business School  
Meluso, John, University of Vermont  
Ménager, Lucie, Université Paris II  
Mendelson, Gal, Technion–Israel Institute of Technology  
Mendes, Diogo, Stockholm School of Economics  
Mendoza, Kimberly, University of Illinois Urbana–Champaign  
Menegatti, Mario, Università di Parma  
Meng, Lesley, Yale University  
Meng, Zixuan, University of Texas at Dallas  
Mennicken, Andrea, London School of Economics and Political Science  
Mergenthaler, Richard, Pennsylvania State University  
Merkley, Kenneth, Indiana University  
Merluzzi, Jennifer, George Washington University  
Merrick, Jason, Virginia Commonwealth University  
Mersereau, Adam, University of North Carolina at Chapel Hill  
Mertins, Vanessa, Institutie for Labour Law and Industrial Relations in the European Community  
Messacar, Derek, Memorial University  
Messinese, Danilo, IE University  
Metcalf, Robert, Columbia University  
Meuris, Jirs, University of Wisconsin–Madison  
Meyer, Andrew, The Chinese University of Hong Kong  
Meyer-Doyle, Philipp, INSEAD  
Mezzanotti, Filippo, Northwestern University  
Miao, Meng, Renmin University of China  
Miao, Rui, National Heart Lung and Blood Institute  
Miao, Sentao, University of Colorado Boulder  
Michaeli, Beatrice, University of California, Los Angeles  
Michaud, Pierre-Carl, University of Lausanne  
Michels, Jeremy, Purdue University  
Miettinen, Topi, Hanken School of Economics  
Mihet, Roxana, University of Montreal  
Milkman, Katherine, University of Pennsylvania  
Mill, Wladislaw, University of Mannheim  
Miller, Alex, University of Southern California  
Miller, Amisha, Leonard N. Stern School of Business  
Miller, Darius, Southern Methodist University  
Miller, David, University of Michigan  
Miller, Doug, Rutgers University  
Miller, Joshua, University of Melbourne  
Miller, Kent, Michigan State University  
Miller, Klaus, HEC Paris  
Miller, Moses, Reichman University  
Mills, Alex, Indiana University Bloomington  
Milone, Mario, University of California, San Diego  
Milyavsky, Maxim, Ono Academic College  
Mimra, Wanda, ESCP Business School  
Min, Byoung-Kyu, Hanyang University  
Minardi, Stefania, HEC Paris  
Minoiu, Camelia, Federal Reserve Bank of Atlanta  
Minutti-Meza, Miguel, University of Miami  
Miric, Milan, University of Southern California  
Mirzaeian, Neda, University of Texas at Dallas  
Mishra, Debasis, Indian Statistical Institute  
Mišić, Velibor, University of California, Los Angeles  
Mislavsky, Robert, Johns Hopkins University  
Mitra, Indrajit, Federal Reserve Bank of Atlanta  
Mitrofanov, Dmitry, Boston College  
Mittal, Vrinda, University of North Carolina at Chapel Hill  
Mitzinneck, Björn, University of Groningen  
Mkrtychyan, Anya, University of Massachusetts Amherst  
Moallemi, Ciamac, Columbia University  
Mobasseri, Sanaz, University of California, Berkeley  
Mobbs, Shawn, University of Alabama  
Mobini, Zahra, Georgia Institute of Technology  
Mochon, Daniel, Tulane University  
Modaresi, Sajad, University of North Carolina at Chapel Hill  
Moehring, Alex, Massachusetts Institute of Technology  
Moerke, Mathis, University of St. Gallen  
Moers, Frank, Maastricht University  
Moghadas Khorasani, Sina, Vanderbilt University  
Mohammadi, Ali, Copenhagen Business School  
Mohliver, Aharon, London Business School  
Mohnen, Myra, University of Ottawa  
Mohrschladt, Hannes, University of Muenster  
Moinas, Sophie, Université Toulouse 1 Capitole  
Moldovan, Rucsandra, Concordia University  
Moliterno, Thomas, Vrije Universiteit Amsterdam  
Mollerstrom, Johanna, George Mason University  
Molnar, Andras, University of Michigan  
Momot, Ruslan, Northwestern University  
Momtaz, Paul, Technical University of Munich  
Monachou, Faidra, Yale University

- Monahan, Steven, University of Utah  
 Monasterolo, Irene, Utrecht University  
 Mondschein, Susana, Universidad de Chile  
 Monnet, Cyril, University of Bern  
 Mononen, Lasse, Universität Bielefeld  
 Montealegre, Andres, Yale University  
 Montibeller, Gilberto, University of Bristol  
 Moon, Ken, University of Pennsylvania  
 Moon, Robbie, Georgia Institute of Technology  
 Moore, Don, University of California, Berkeley  
 Moraga Gonzalez, Jose Luis, Free University  
 Amsterdam  
 Moraux, Franck, Universite de Rennes  
 Moreira, Solon, Temple University  
 Morgenstern, Ilan, Stanford University  
 Moritz, Brent, Pennsylvania State University  
 Mormann, Milica, Southern Methodist University  
 Morozov, Ilya, Northwestern University  
 Morrill, Thayer, North Carolina State University  
 Morrison, Elizabeth, New York University  
 Morton, Alec, University of Strathclyde  
 Moshary, Sarah, University of Chicago  
 Moss, Austin, University of Colorado Boulder  
 Mostagir, Mohamed, University of Michigan  
 Mouchtaki, Omar, Leonard N. Stern School of  
 Business  
 Mousavi, Kianoush, EPFL  
 Mousavi, Nasim, Georgia State University  
 Moyon, Nathalie, University of Colorado Boulder  
 Mueller, Maximilian, Toulouse School of Economics  
 Mueller, Peter, Fordham University  
 Muermann, Alexander, Vienna University of Econom-  
 ics and Business  
 Muhle-Karbe, Johannes, Imperial College London  
 Muhn, Maximilian, University of Chicago  
 Mukerji, Sujoy, Queen Mary University of London  
 Mukharlamov, Vladimir, Georgetown University  
 Mukherjee, Abhiroop, Hong Kong University of Sci-  
 ence and Technology  
 Mukherjee, Arijit, Michigan State University  
 Mukherjee, Rajiv, Texas A&M University  
 Mukherjee, Ujjal, University of Illinois  
 Urbana–Champaign  
 Mulder, Philip, University of Wisconsin–Madison  
 Mulier, Klaas, Ghent University  
 Muller, Karsten, National University of Singapore  
 Müller-Trede, Johannes, University of Navarra  
 Mullins, William, University of California, San Diego  
 Mummalaneni, Simha, University of Washington  
 Mumtaz Choudhary, Saqib, University of California,  
 Berkeley  
 Muñoz-Rodriguez, Edwin, The College of Mexico A.C.  
 Munro, Evan, Stanford University  
 Murali, Karthik, Oregon State University  
 Muravyev, Dmitriy, University of Illinois  
 Urbana–Champaign  
 Murawski, Carsten, University of Melbourne  
 Murciano-Goroff, Raviv, Boston University  
 Murooka, Takeshi, Osaka University  
 Murphy, Dermot, University of Illinois Chicago  
 Murray, Scott, Georgia State University  
 Murry, Charles, University of Michigan  
 Murthy, Karthyek, Singapore University of  
 Technology and Design  
 Muslu, Volkan, University of Houston  
 Muthulingam, Suresh, Pennsylvania State University  
 Muuls, Mirabelle, Imperial College London  
 Myers, Kyle, Harvard Business School  
 Myers, Sean, University of Pennsylvania  
 Naaraayanan, S. Lakshmi, Hong Kong University of  
 Science and Technology  
 Nachum, Ofir, OpenAI Inc.  
 Nadar, Emre, Bilkent University  
 Nadarajah, Selvaprabu, University of Illinois Chicago  
 Nagar, Jay Prakash, Duke University  
 Nageswaran, Leela, University of Washington  
 Nagle, Frank, Harvard Business School  
 Nair, Krishnan, University of Illinois  
 Urbana–Champaign  
 Najafi, Sajjad, HEC Paris  
 Najafi, Sami, Santa Clara University  
 Najjar, Nouri, Western University  
 Namkoong, Hongseok, Columbia University  
 Nanda, Ramana, Imperial College London  
 Narajabad, Borghan, Federal Reserve Board  
 Narang, Unnati, University of Illinois  
 Urbana–Champaign  
 Naranjo, Patricia, Rice University  
 Narayan, Vishal, University of Connecticut  
 Narayanan, Sridhar, Stanford Graduate School of  
 Business  
 Nasiry, Javad, McGill University  
 Natan, Olivia, University of California, Berkeley  
 Natarajan, Karthik, University of Minnesota  
 Natenzon, Paulo, Washington University in St. Louis  
 Nathanson, Charles, Northwestern University  
 Natividad, Gabriel, University of Piura  
 Naughton, James, University of Virginia  
 Navarro-Martinez, Daniel, Pompeu Fabra University  
 Nave, Gideon, University of Pennsylvania  
 Naveen, Lalitha, Temple University  
 Nax, Heinrich, University of Zurich  
 Neamtiu, Monica, University of Arizona  
 Neely, Christopher, Federal Reserve Bank of  
 Saint Louis  
 Neeman, Zvika, Tel Aviv University  
 Negro, Giacomo, Emory University  
 Nekrasov, Alexander, University of Illinois Chicago  
 Nelson, Barry, Northwestern University  
 Nelson, Karen, Texas Christian University  
 Neprash, Hannah, University of Minnesota  
 Nessa, Michelle, Michigan State University

- Nesterov, Alexander, Higher School of Economics in St. Petersburg
- Netemeyer, Richard, University of Virginia
- Netland, Torbjorn, ETH Zurich
- Nettasinghe, Buddhika, University of Iowa
- Netzer, Oded, Columbia University
- Neuhierl, Andreas, Washington University in St. Louis
- Neuman, Eyal, Imperial College London
- Neumann, Dirk, University of Freiburg
- Neumann, Nico, University of Melbourne
- Neururer, Thaddeus, University of Akron
- Newberry, Peter, University of Georgia
- Newell, Ben, University of New South Wales
- Newman, Andrew, University of South Carolina
- Newton, Nate, Florida State University
- Ng, Jeffrey, University of Hong Kong
- Ng, Lilian, York University
- Ng, Weiyi, National University of Singapore
- Nguyen, Duc Duy, Durham University
- Nguyen, Huyen, Halle Institute for Economic Research
- Nguyen, Jason, Western University
- Nguyen, Quoc, DePaul University
- Nguyen, Thanh, Purdue University
- Nguyen, Trung, Harvard Business School
- Nguyen, Viet Anh, Chinese University of Hong Kong
- Ni, Jian, Virginia Polytechnic Institute and State University
- Ni, Tu, Harvard Business School
- Nian, Tingting, University of California, Irvine
- Niazadeh, Rad, University of Chicago
- Nickerson, Jordan, University of Washington
- Nicoletti, Allison, University of Pennsylvania
- Niederhoff, Julie, Syracuse University
- Niehuas, Greg, University of South Carolina
- Nielsen, Kasper, Hong Kong University of Science and Technology
- Niepmann, Friederike, Federal Reserve Board
- Niessen-Ruenzi, Alexandra, University of Mannheim
- Niessner, Marina, Indiana University Bloomington
- Niewoehner, Rj, Indiana University Bloomington
- Niggemann, Felix, University of Zurich
- Nikias, Anthony, Albany State University
- Nikolov, Boris, University of Lausanne
- Nikolova, Stanislava, University of Nebraska–Lincoln
- Nikoofal, Mohammad Ebrahim, Ryerson University
- Nin, Jordi, Ramon Llull University
- Ning, Jie, Case Western Reserve University
- Ning, Z. Eddie, Cheung Kong Graduate School of Business
- Nini, Greg, Drexel University
- Nittala, Lakshmi, University of Dayton
- Niu, Xiaofei, Shandong University
- Niu, Yimeng, Tilburg University
- Noda, Shunya, University of Tokyo
- Noh, Daehoon, University of San Diego
- Noh, Don, Hong Kong University of Science and Technology
- Norde, Henk, Tilburg University
- Norden, Lars, Fundação Getulio Vargas
- Normann, Hans-Theo, University of Duesseldorf
- Novelli, Elena, City, University of London
- Nozawa, Yoshio, University of Toronto
- Nurmohamed, Samir, University of Pennsylvania
- Obermeier, Daniel, New York University Stern School of Business
- Obizhaeva, Olga, Stockholm School of Economics
- O’Connell, Stephen D., Emory University
- O’Dea, Cormac, Yale University
- Ody-Brasier, Amandine, McGill University
- Odziemkowska, Kate, University of Toronto
- Oechsler, Joerg, University of Heidelberg
- Oery, Aniko, Yale University
- Oetl, Alex, Georgia Institute of Technology
- Officer, Micah, Loyola Marymount University
- Oh, Hyelim, National University of Singapore
- Oh, Jaelynn, University of Utah
- Oh, Jun, Purdue University
- Oh, Suanna, Paris School of Economics
- Olafsson, Arna, Copenhagen Business School
- Olafsson, Svein, Stevens Institute of Technology
- Olbert, Marcel, London Business School
- Oliva, Rogelio, Texas A & M University
- Olschewski, Sebastian, University of Basel
- Omartian, Jim, University of Michigan
- Oncüler, Ayse, ESSEC Business School
- Operti, Elisa, University of Lugano
- Oppong-Tawiah, Divinus, York University
- Oraiopoulos, Nektarios, Cambridge University
- Orfanoudaki, Agni, University of Oxford
- Orland, Andreas, Corvinus University of Budapest
- Orlov, Dmitry, University of Rochester
- Orłowski, Piotr, HEC Montréal
- Ormeci, Melda, University of New Hampshire
- Orsdemir, Adem, University of California, Riverside
- Osadchiy, Nikolay, Emory University
- Osborne, Matthew, University of Toronto
- Osun, Elif, University of Maryland, College Park
- Otero, Cristobal, Columbia University
- Otter, Thomas, Goethe University
- Otto, Clemens, HEC Paris
- Ouazad, Amine, Rutgers University
- Ouyang, Huiyin, University of Hong Kong
- Ouyang, Shumiao, University of Oxford
- Ovchinnikov, Anton, Queen’s University
- Ovtchinnikov, Alexei, HEC Paris
- Owan, Hideo, Waseda University
- Oz, Binyamin, Hebrew University of Jerusalem
- Ozalp, Hakan, University of Amsterdam
- Ozaltin, Osman, North Carolina State University
- Ozbay, Erkut, University of Maryland

- Ozdagli, Ali K., Federal Reserve Bank of Dallas  
 Ozel, N. Bugra, University of Texas at Dallas  
 Ozkan, Erhun, Koç University  
 Pace, Davide, Ludwig Maximilian University of Munich  
 Pacelli, Joseph, Harvard Business School  
 Pachali, Max, Tilburg University  
 Packard, Heidi, University of Michigan  
 Padilla, Jorge, Compass Lexecon  
 Padilla, Nicolas, London Business School  
 Pae, Suil, Sungkyunkwan University  
 Paffenholz, Michaela, Ludwig Maximilian University of Munich  
 Page, Lionel, University of Queensland  
 Pagel, Michaela, Washington University in St. Louis  
 Pagnotta, Emiliano, Singapore Management University  
 Paharia, Neeru, Arizona State University  
 Pai, Mallesh, Rice University  
 Painter, Marcus, Saint Louis University  
 Palacios, Miguel, University of Calgary  
 Palan, Stefan, University of Graz  
 Palczewski, Jan, University of Leeds  
 Palley, Asa, Indiana University Bloomington  
 Palley, Thomas, Indiana University Bloomington  
 Paludkiewicz, Karol, Deutsche Bundesbank  
 Pan Fang, Tommy, Rice University  
 Pan, Kai, Hong Kong Polytechnic University  
 Pan, Siqi, University of Melbourne  
 Pan, Xiajun, University of Florida  
 Pan, Yang, Tulane University  
 Pan, Yihui, University of Utah  
 Panayides, Marios, University of Oklahoma  
 Pancost, Aaron, University of Texas at Austin  
 Pandit, Shail, University of Illinois Chicago  
 Pangburn, Michael, University of Oregon  
 Panico, Claudio, Bocconi University  
 Pankratz, Nora, University of Toronto  
 Pany, Max, Harvard University  
 Paolacci, Gabriele, Erasmus University Rotterdam  
 Papakonstantinou, Filippou, King's College London  
 Papanastasiou, Yiannos, Rice University  
 Papanikolaou, Nikolaos, Newcastle University  
 Paradkar, Nikhil, Georgia Institute of Technology  
 Parakhonyak, Alexei, University of Oxford  
 Parasurama, Prasanna, Emory University  
 Park, Eunyoung, Hong Kong University of Science and Technology  
 Park, Jae-Hyuck, New Jersey Institute of Technology  
 Park, Jisoo, Clark University  
 Park, Jiyong, University of Georgia  
 Park, Michael, INSEAD  
 Park, Min, University of Kansas  
 Park, Minje, University of Hong Kong  
 Park, Sanghyun, National University of Singapore  
 Park, Sungsik, University of South Carolina  
 Park, Young-Hoon, Cornell University  
 Park, Youngki, George Washington University  
 Parker, Chris, University of Virginia  
 Parsa, Iman, INSEAD  
 Paruchuri, Srikanth, Pennsylvania State University  
 Pataconi, Andrea, University of East Anglia  
 Patel, Saurin, Western University  
 Patrick, Paige, University of Illinois Chicago  
 Patton, Andrew, Duke University  
 Paugam, Luc, HEC Paris  
 Paul, Pascal, Federal Reserve Bank San Francisco  
 Paulson, Elisabeth, Harvard University  
 Pauphilet, Jean, London Business School  
 Pauwels, Koen, Northeastern University  
 Pavlin, Michael, Wilfrid Laurier University  
 Pavlov, Andrey, Simon Fraser University  
 Pawliczek, Andrea, University of Colorado  
 Paye, Bradley, Virginia Polytechnic Institute and State University  
 Pedio, Manuela, University of Bristol  
 Peecher, Mark, University of Illinois Urbana-Champaign  
 Pei, Amy, Northeastern University  
 Peijnenburg, Kim, EDHEC Business School  
 Peitz, Martin, University of Mannheim  
 Peker, Cem, Erasmus University Rotterdam  
 Pelizzon, Lioriana, Leibniz Institute for Financial Research SAFE  
 Pellegrino, Bruno, University of California, Los Angeles  
 Pelucco, Valerio, LUISS University  
 Pendem, Pradeep K., University of Oregon  
 Peng, Cameron, London School of Economics and Political Science  
 Peng, Chih-Hung, National Taiwan University  
 Peng, Jing, University of Connecticut  
 Peng, Lin, Baruch College  
 Peng, Tianyi, Columbia University  
 Peng, Xiaoshan, Indiana University Bloomington  
 Peng, Xiaoxia, University of Utah  
 Peng, Yijie, Peking University  
 Peng, Yushi, Tilburg University  
 Pennacchi, George, University of Illinois  
 Pennycook, Gordon, University of Regina  
 Perdikaki, Olga, University of South Carolina  
 Perez Cavazos, Gerardo, University of California, San Diego  
 Perkowski, Patryk, Columbia University  
 Pernoud, Agathe, Stanford University  
 Perols, Johan, University of San Diego  
 Perrakis, Stylianos, Concordia University  
 Petacchi, Reining, Georgetown University  
 Peters, Dominik, National Centre for Scientific Research  
 Peterson, Kyle, University of Oregon  
 Petropoulos, Fotios, University of Bath

- Petropoulos, Georgios, Massachusetts Institute of Technology
- Petry, Stefan, University of Manchester
- Petryk, Mariia, George Mason University
- Peukert, Christian, University of Lausanne
- Peura, Heikki, Aalto University
- Peytcheva, Marietta, Lehigh University
- Pfeiffer, Thomas, University of Vienna
- Pflueger, Carolin, University of Chicago
- Phalippou, Ludo, University of Oxford
- Pham, Dong Nghi, ESSEC Business School
- Philipps, Collin, University of North Alabama
- Phillips, Matt, Massachusetts Institute of Technology
- Phua, Kenny, University of Technology Sydney
- Piazza, Alessandro, Rice University
- Piccolo, Alessio, Indiana University Bloomington
- Pichler, Alois, Chemnitz University of Technology
- Pickerd, Jeffrey, Brigham Young University
- Pierce, Spencer, Florida State University
- Piezunka, Henning, University of Pennsylvania
- Pikulina, Elena, Sauder School of Business
- Pillai, Sandeep, Bocconi University
- Pinkowitz, Lee, Georgetown University
- Pino, Flavio, Polytechnic University of Turin
- Pinson, Pierre, Imperial College London
- Piorkowski, Mark, Indiana University
- Piri, Hossein, University of Calgary
- Pirinsky, Christo, University of Central Florida
- Pitkääjärvi, Aleksii, Aalto University
- Plante, Sebastian, University of Wisconsin–Madison
- Pless, Jacquelyn, Massachusetts Institute of Technology
- Png, Ivan, National University of Singapore
- Poblete, Joaquin, Pontifical Catholic University of Chile
- Podimata, Chara, Massachusetts Institute of Technology
- Poege, Felix, Bocconi University
- Polak, Pawel, Stony Brook University
- Poliquin, Christopher, University of California, Los Angeles
- Pollet, Joshua, University of Illinois
- Polman, Evan, University of Wisconsin–Madison
- Polo, Andrea, LUISS University
- Polyakova, Maria, Stanford University
- Polzer, Jeffrey, Harvard Business School
- Pomatto, Luciano, California Institute of Technology
- Pongeluppe, Leandro, University of Pennsylvania
- Ponti, Giovanni, University of Alicante
- Popov, Alexander, European Central Bank
- Popp, David, Syracuse University
- Porreca, Zachary, Bocconi University
- Portocarrero, Florencio, London School of Economics and Political Science
- Poskanzer, Ethan, Massachusetts Institute of Technology
- Post, Thierry, Koç University
- Post, Thomas, Maastricht University
- Potočník, Kristina, University of Edinburgh Business School
- Potoski, Matthew, University of California, Santa Barbara
- Potters, Jan, Tilburg University
- Pouget, Sébastien, Toulouse School of Economics
- Poulsen, Anders, University of East Anglia
- Povel, Paul, University of Houston
- Powell, Mike, Northwestern University
- Prabhala, Nagpurnanand, Johns Hopkins University
- Prado, Melissa, Nova School of Business and Economics
- Prager, Elena, Northwestern University
- Prat, Julian, Polytechnic Institute of Paris
- Pratt, Ryan, Brigham Young University
- Presbitero, Andrea, International Monetary Fund
- Presslee, Adam, University of Waterloo
- Preuss, Marcel, Cornell University
- Previtero, Alessandro, Indiana University
- Prilmeier, Robert, Tulane University
- Pritsker, Matthew, Federal Reserve Bank of Boston
- Profeta, Paola, Bocconi University
- Pronzato, Chiara, University of Turin
- Proserpio, Davide, University of Southern California
- Prowse, Victoria, Purdue University
- Prüfer, Jens, Tilburg University
- Pruitt, Seth, Arizona State University
- Pu, Jingchuan, University of Florida
- Pukthuanthong, Kuntara, University of Missouri
- Pullabhotla, Hemant, Deakin University
- Pun, Chi Seng, Nanyang Technological University
- Puntoni, Stefano, University of Pennsylvania
- Punzi, Maria Teresa, Singapore Management University
- Pursiainen, Vesa, University of St. Gallen
- Putterman, Louis, Brown University
- Qi, Anyan, University of Texas at Dallas
- Qi, Meng, University of California, Berkeley
- Qi, Wei, Tsinghua University
- Qi, Xuyuanda, New York University Shanghai
- Qi, Zhengling, George Washington University
- Qian, Jingyi, University of Maryland
- Qian, Jialin, Georgia State University
- Qian, Jun, Fudan University
- Qian, Kun, University of Massachusetts Amherst
- Qian, Pengyu, Boston University
- Qian, Wenlan, National University of Singapore
- Qiao, Kunyuan, Northeastern University
- Qiao, Mengke, University of Alabama
- Qiao, Xiao, City University of Hong Kong
- Qin, Bei, Hong Kong Baptist University
- Qin, Hanzhang, National University of Singapore
- Qiu, Jiaping, McMaster University
- Qiu, Liangfei, University of Florida

- Qiu, Lin, Purdue University  
 Qiu, Tian, University of Alabama  
 Qiu, Yue, Temple University  
 Qu, Xiangyu, National Centre for Scientific Research  
 Qu, Xinxue (Shawn), University of Notre Dame  
 Qu, Yuanyu, University of International Business and Economics  
 Quercia, Simone, University of Verona  
 Quigley, Timothy, University of Georgia  
 Quinn, Martin, Universidade Católica Portuguesa Católica  
 Quinn, Phil, University of Washington  
 Quintane, Eric, European School of Management and Technology  
 Quist, Kramer, Massachusetts Institute of Technology  
 Rabanal, Jean Paul, University of Stavanger  
 Rabetti, Daniel, National University of Singapore  
 Rabier, Maryjane, McGill University  
 Rabinovitch, Hagai, University of Amsterdam  
 Radbruch, Jonas, Institute for Labor Economics  
 Raffiee, Joseph, University of Southern California  
 Rafieian, Omid, Cornell University  
 Raghavan, Manish, Harvard University  
 Raghunandan, Aneesh, Yale University  
 Rahimian, M. Amin, University of Pittsburgh  
 Rahman, Mohammad, Purdue University  
 Rahmani, Morvarid, Georgia Institute of Technology  
 Rai, Aneesh, University of Maryland, College Park  
 Raith, Michael, University of Rochester  
 Raj, Manav, University of Pennsylvania  
 Rajan, Uday, University of Michigan  
 Rajapakshe, Tharanga, University of Florida  
 Rajaram, Prashant, Western University  
 Rajgopal, Shivaram, Columbia University  
 Ramachandran, Karthik, Georgia Institute of Technology  
 Ramanan, Paritosh, Oklahoma State University  
 Ramanan, Ram, Indian School of Business  
 Ramasubramanian, Hari, Frankfurt School  
 Ramchandani, Abhishek, University of Hawai'i at Manoa  
 Ramirez, Carlos, ESSEC Business School  
 Ramos, Sofia, ESSEC Business School  
 Ranasinghe, Tharindra, American University  
 Rand, David, Massachusetts Institute of Technology  
 Ranganathan, Aruna, Stanford University  
 Ranganathan, Ram, University of Texas at Austin  
 Ranjan, Bhoomija, Monash University  
 Ransbotham, Sam, Boston College  
 Rao, Anita, Georgetown University  
 Rao, Kariyushi, Warwick Business School  
 Rao, Raghunath, University of Texas at Austin  
 Rao, Vithala, Cornell University  
 Rapach, David, Federal Reserve Bank of Atlanta  
 Rasch, Alexander, Düsseldorf Institute for Competition Economics  
 Rasooly, Itzhak, Sciences Po  
 Rastogi, Chhavi, International Finance Corporation  
 Ratliff, Kate, University of Florida  
 Rauter, Thomas, University of Chicago  
 Raveendran, Marlo, University of California, Riverside  
 Ravindran, Dilip, Humboldt University of Berlin  
 Rawson, Caleb, University of Arkansas  
 Ray, Abhishek, George Mason University  
 Raymond, Lindsey, Massachusetts Institute of Technology  
 Rea, David, University of Cincinnati  
 Read, Daniel, Durham University  
 Ready, Rob, University of Oregon  
 Rebholz, Tobias, University of Tübingen  
 Recalde, Maria, University of Melbourne  
 Reed, Sara, University of Kansas  
 Rees-Jones, Alex, University of Pennsylvania  
 Regev, Tali, Reichman University  
 Regnier, Eva, Naval Postgraduate School  
 Rehbeck, John, Ohio State University  
 Reher, Michael, University of California, San Diego  
 Reichman, Shachar, Tel Aviv University  
 Reid, Erin, McMaster University  
 Reiff, Joseph, University of Maryland  
 Reimers, Imke, Cornell University  
 Reinholtz, Nicholas, University of Colorado Boulder  
 Reisinger, Markus, Frankfurt School  
 Reisinger, Markus, WHU–Otto Beisheim School of Management  
 Reiter, Nayana, University of Toronto  
 Relihan, Lindsay, Purdue University  
 Ren, Charlotte, University of Pennsylvania  
 Ren, Hang, George Mason University  
 Ren, Honglin, Renmin University of China  
 Ren, Qitian, Chinese University of Hong Kong, Shenzhen  
 Renjie, Rex Wang, VU Amsterdam  
 Reno, Roberto, ESSEC Business School  
 Repetto, Luca, Uppsala University  
 Reppen, Max, Boston University  
 Reschke, Brian, Brigham Young University  
 Reshef, Oren, Washington University in St. Louis  
 Reshidi, Pellumb, Duke University  
 Reuben, Ernesto, New York University  
 Reuter, Jonathan, Boston College  
 Rey Biel, Pedro, Ramon Llull University  
 Reza, Sadat, Nanyang Technological University  
 Rhee, Chang-Han, Northwestern University  
 Rhee, Kyung Sun "Melissa", University of Florida  
 Rho, Hye Jin, Michigan State University  
 Rhodes, Andrew, Toulouse School of Economics  
 Richard, Thibault, Paris-Saclay University  
 Richardson, Vernon, University of Arkansas  
 Richards-Shubik, Seth, Johns Hopkins University  
 Rick, Scott, University of Michigan

- Rickne, Johanna, Swedish Institute for Social Research  
Riddiough (Toronto), Steven, University of Toronto  
Rider, Christopher, University of Michigan  
Riedel, Frank, Bielefeld University  
Riedl, Christoph, Northeastern University  
Riedl, Eddie, Harvard Business School  
Rieger, Marc Oliver, University of Zurich  
Riener, Gerhard, University of Southampton  
Rietveld, Joost, University College London  
Righi, Cesare, Universitat Pompeu Fabra  
Rigotti, Luca, University of Pittsburgh  
Riordan, Ryan, Queen's University  
Rios, Ignacio, University of Texas at Dallas  
Rissing, Ben, Cornell University  
Ritzwoller, David, Stanford University  
Rivas, Fernanda, Middle East Technical University  
Rivera, Thomas, McGill University  
Riyanto, Yohanes, Nanyang Technological University  
Robatto, Roberto, University of Wisconsin–Madison  
Robertson, Adriana, University of Chicago  
Robinson, Leslie, Dartmouth College  
Robinson-Cortés, Alejandro, University of Exeter  
Rocha, Vera, Copenhagen Business School  
Roche, Maria, Harvard University  
Rock, Daniel, University of Pennsylvania  
Rodemeier, Matthias, Bocconi University  
Rodilitz, Scott, University of California, Los Angeles  
Rodrigo, Rodimiro, George Washington University  
Rodríguez, Fabrizio, University of Montevideo  
Roet-Green, Ricky, University of Rochester  
Rogo, Rafael, University of Cambridge  
Rola-Janicka, Magdalena, Imperial College London  
Romagnoli, Giorgia, University of Amsterdam  
Romanosky, Sasha, RAND Corporation  
Romec, Arthur, Toulouse Business School  
Romero Morales, Dolores, Copenhagen Business School  
Romero, Gonzalo, University of Toronto  
Ronayne, David, European School of Management and Technology  
Ronchi, Maddalena, Northwestern University  
Roncoroni, Andrea, ESSEC Business School  
Rong, Ying, Shanghai Jiao Tong University  
Roos, Jason, Erasmus University Rotterdam  
Rosato, Antonio, University of Queensland  
Rosazza Gianin, Emanuela, University of Milano-Bicocca  
Rose, Julia, Erasmus University Rotterdam  
Rosen, Samuel, Temple University  
Rosenbaum, David, University of California, Riverside  
Rosenbaum, Mathieu, University Pierre and Marie Curie  
Rosokha, Yaroslav, Purdue University  
Ross, David, University of Florida  
Rossi, Alberto, Georgetown University  
Rossi, Andrea, University of Arizona  
Rossi, Marco, Texas A&M University  
Roth, Yefim, University of Haifa  
Rottke, Simon, University of Amsterdam  
Roulet, Alexandra, INSEAD  
Roussellet, Guillaume, McGill University  
Roy, Abhishek, Temple University  
Roy, Dwaipayan, University of Virginia  
Roy, Nilanjan, City University of Hong Kong  
Roy, Rahul, University of North Carolina at Chapel Hill  
Rozenbaum, Oded, George Washington University  
Rozsypal, Filip, Danmarks Nationalbank  
Ru, Hong, Nanyang Technological University  
Ruan, Hongxun, Peking University  
Ruan, Tianyue, National University of Singapore  
Rubel, Olivier, University of California, Davis  
Ruble, Richard, Emlyon Business School  
Rud, Olga, University of Stavanger  
Ruffini, Krista, Georgetown University  
Rujeerapaiboon, Napat, National University of Singapore  
Runge, Julian, Northeastern University  
Rupar-Wang, Kathy, Georgia Institute of Technology  
Rust, John, Georgetown University  
Rustagi, Devesh, University of Warwick  
Rutter, Tom, Stanford University  
Ryall, Michael, University of Toronto  
Ryan, Chris, University of British Columbia  
Ryu, Wonsang, Yonsei University  
Ryvkin, Dmitry, Royal Melbourne Institute of Technology  
Ryzhov, Ilya, University of Maryland  
Rzeznik, Aleksandra, York University  
Sabzehzar, Amin, Tulane University  
Saccardo, Silvia, Carnegie Mellon University  
Sacchetto, Stefano, University of Navarra  
Sachdeva, Kunal, Rice University  
Sacks, Dan, Wisconsin School of Business  
Sadka, Gil, University of Texas at Dallas  
Sadler, Evan, Columbia University  
Sadri, Mohamad, Simon Fraser University  
Saeedi, Maryam, Carnegie Mellon University  
Saez de Tejada Cuenca, Anna, IESE Business School  
Saffi, Pedro, Cambridge University  
Saffie, Felipe, University of Virginia  
Sagi, Jacob, Kenan-Flagler Business School, University of North Carolina at Chapel Hill  
Saglam, Mehmet, University of Cincinnati  
Sagratella, Simone, University of Rome La Sapienza  
Saha, Rajib, Indian School of Business  
Sahni, Navdeep, Stanford University  
Sahuguet, Nicolas, HEC Montréal  
Saidi, Farzad, University of Bonn  
Saito, Kota, California Institute of Technology  
Sajjadiani, Sima, University of British Columbia

- Sajons, Gwendolin, ESCP Business School  
Sakakibara, Mariko, University of California, Los Angeles  
Salamanca, Nicolás, University of Melbourne  
Salari, Ehsan, Wichita State University  
Saldanha, Terence, University of Georgia  
Saleh, Fahad, University of Florida  
Salmon, Tim, Southern Methodist University  
Saltzman, Evan, Emory University  
Salz, Tobias, Massachusetts Institute of Technology  
Samiedaluie, Saied, University of Alberta  
Sammon, Marco, Northwestern University  
Samuels, Delphine, University of Chicago  
Sanati, Ali, American University  
Sanchis-Guarner, Rosa, University of Barcelona  
Sand, Ben, York University  
Sandberg, Anna, Swedish Institute for Social Research  
Sanders, Danielle, United States Census Bureau  
Sanders, Robert, University of California, San Diego  
Sandulescu, Mirela, University of Michigan  
Sandvik, Jason, University of Arizona  
Sankaranarayanan, Sriram, Indian Institute of Management–Ahmedabad  
Sansing, Richard, Dartmouth College  
Santaló Mediavilla, Juan, IE Business School  
Santamaria, Natalia, Cornell University  
Santamaria, Simone, National University of Singapore  
Santos, André Ap, University of Edinburgh  
Santos, Joao, Federal Reserve Bank of New York  
Santosh, Shrihari, University of Maryland  
Sarada, Sarada, University of California, Los Angeles  
Saretto, Alessio, Federal Reserve Bank of Dallas  
Sarhangian, Vahid, University of Toronto  
Sariri, Amir, Purdue University  
Saritaç, Ömer, London Business School  
Sarkar, Sumit, University of Texas at Dallas  
Sastry, Parinitha, Columbia University  
Satopaa, Ville, INSEAD  
Saucet, Charlotte, Panthéon-Sorbonne University  
Saueremann, Henry, European School of Management and Technology  
Saueremann, Jan, Stockholm University  
Sauzet, Maxime, Boston University  
Savje, Fredrik, Uppsala University  
Savochkin, Andrei, Bocconi University  
Savolainen, Ville, Aalto University  
Savor, Pavel, DePaul University  
Saxton, Gregory, York University  
Scaillet, Olivier, University of Geneva  
Schaeck, Klaus, University of Bristol  
Schandlbauer, Alexander, University of Southern Denmark  
Schaner, Simone, Dartmouth College  
Schanke, Scott, University of Wisconsin-Milwaukee  
Schantl, Stefan, University of Melbourne  
Schaub, Nic, WHU–Otto Beisheim School of Management  
Schaufele, Brandon, University of Western Ontario  
Schechter, Aaron, University of Georgia  
Schepens, Glenn, European Central Bank  
Scherbina, Anna, Brandeis University  
Schildberg-Hörisch, Hannah, Düsseldorf Institute for Competition Economics  
Schilke, Oliver, University of Arizona  
Schiller, Christoph, Arizona State University  
Schilling, Linda, Washington University in St. Louis  
Schindler, David, Tilburg University  
Schiprowski, Amelie, University of Bonn  
Schivardi, Fabiano, LUISS University  
Schlapp, Jochen, Frankfurt School  
Schlund, Rachel, Cornell University  
Schmalz, Martin, University of Oxford  
Schmardebeck, Roy, University of Tennessee  
Schmid, Markus, University of St. Gallen  
Schmid, Thomas, University of Hong Kong  
Schmidbauer, Eric, University of Central Florida  
Schmidt, Andrew, North Carolina State University  
Schmidt, Breno, University of New South Wales  
Schmidt, Brent, Pennsylvania State University  
Schmidt, Daniel, HEC Paris  
Schmidt, William, Emory University  
Schnackenberg, Andrew, University of Denver  
Schneemeier, Jan, Michigan State University  
Schneider, Daniel, Harvard University  
Schneider, Paul, University of Lugano  
Schnurr, Daniel, University of Regensburg  
Schoenherr, David, Princeton University  
Schoenmakers, John, Weierstrass Institute  
Schonberger, Bryce, University of Colorado Boulder  
Schotman, Peter, Maastricht University  
Schotter, Andrew, New York University  
Schöttner, Anja, Humboldt University Berlin  
Schreindorfer, David, Michigan State University  
Schreyer, Dominik, WHU–Otto Beisheim School of Management  
Schrimpf, Paul, University of British Columbia  
Schröder, Marina, Universität Hannover  
Schroeder, Joe, Indiana University  
Schroth, Enrique, EDHEC Business School  
Schubert, Gregor, University of California, Los Angeles  
Schudy, Simeon, Ulm University  
Schuett, Florian, KU Leuven  
Schuetz, Sebastian, Sam M. Walton College of Business  
Schuhmacher, Karl, Emory University  
Schulze, Christian, Frankfurt School  
Schumacher, David, McGill University  
Schumacher, Heiner, KU Leuven  
Schunk, Daniel, University of Mainz  
Schürhoff, Norman, University of Lausanne

- Schwab, Casey, University of North Texas  
Schwandt, Hannes, Northwestern University  
Schwardmann, Peter, Carnegie Mellon University  
Schwartz, Eric, University of Michigan  
Schwarz, Chris, University of California, Irvine  
Schwarz, Marco, Heinrich Heine University  
Düsseldorf  
Schwenkler, Gustavo, Santa Clara University  
Schwerter, Frederik, Frankfurt School  
Scopelliti, Irene, City, University of London  
Scott, Alex, University of Tennessee  
Scur, Daniela, Cornell University  
Sebald, Alexander, Copenhagen Business School  
Sedoc, João, New York University  
See, Kelly, University of Colorado Denver  
Seergars, Lumumba, Harvard Business School  
Segal, Gill, University of North Carolina at  
Chapel Hill  
Seghini, Caterina, Banque de France  
Seibel, Regina, University of Toronto  
Seifert, Matthias, IE Business School  
Sekerci, Naciye, KU Leuven  
Sela, Aner, University of Florida  
Selove, Matthew, Chapman University  
Seltzer, Lee, Federal Reserve Bank of New York  
Selvi, Aras, Imperial College London  
Semadeni, Matthew, Arizona State University  
Sen, Ananya, Carnegie Mellon University  
Sen, Ishita, Harvard University  
Senot, Claire, Tulane University  
Seo, Haram, Texas A&M University  
Seo, Sang Byung, University of Wisconsin–Madison  
Seregni, Carol, University of Pennsylvania  
Serfling, Matthew, University of Tennessee  
Sergeyev, Dmitriy, Bocconi University  
Serpa, Juan, Universidad Cooperativa de Colombia  
Serrano, Carlos, HEC Paris  
Serrano-Veldarde, Nicolas, Bocconi University  
Servaes, Henri, London Business School  
Sethuraman, Mani, Cornell University  
Sethuraman, Nagarajan, University of Kansas  
Sette, Enrico, Banca d'Italia  
Setzer, Thomas, Katholische Universität Eichstätt-  
Ingolstadt  
Seupaul, Rawle, Carilion Clinic  
Sevcenko, Victoria, INSEAD  
Sevilir, Merih, ESMT Berlin  
Sextroh, Christoph, Tilburg University  
Seybert, Nick, University of Maryland  
Shaddy, Franklin, University of California, Los  
Angeles  
Shaffer, Matthew, University of Southern California  
Shafieezadeh-Abadeh, Soroosh, Cornell University  
Shah, Anand, Massachusetts Institute of Technology  
Shah, Nihar, Carnegie Mellon University  
Shahrokhi Tehrani, Shervin, University of Texas at  
Dallas  
Shakespeare, Catherine, University of Michigan  
Shaliastovich, Ivan, University of Wisconsin–Madison  
Shamir, Noam, Tel Aviv University  
Shams, Amin, Ohio State University  
Shan, Chenyu, Shanghai University of Finance and  
Economics  
Shan, Guohou, Northeastern University  
Shan, Hongyu, China Europe International Business  
School  
Shan, Yu, Syracuse University  
Shankar, Ramesh, University of Connecticut  
Shantikumar, Devin, University of California, Irvine  
Shapiro, Alexander, Georgia Institute of Technology  
Sharma, Anish, University of Georgia  
Sharma, Karmini, Stanford University  
Sharma, Neha, Northwestern University  
Sharma, Siddhartha, Indiana University Bloomington  
She, Guoman, University of Hong Kong  
She, Zhaowei, Singapore Management University  
Shechter, Steven, University of British Columbia  
Sheer, Lia, Tel Aviv University  
Shekhar, Shiva, Heinrich Heine University Düsseldorf  
Shekhar, Shiva, Tilburg University  
Shelef, Orie, University of Utah  
Shelegia, Sandro, Universitat Pompeu Fabra  
Shen, Dennis, University of Southern California  
Shen, Lily, Clemson University  
Shen, Lin, INSEAD  
Shen, Min, Baruch College  
Shen, Qiaowei, Peking University  
Shen, Siqian, University of Michigan  
Shen, Yiwen, Hong Kong University of Science and  
Technology  
Sheneman, Amy, Ohio State University  
Sheng, Jinfei, University of California, Irvine  
Sherman, Eliot, Georgetown University  
Shevlin, Terry, University of California, Irvine  
Shi, Cong, University of Miami  
Shi, Duo, Chinese University of Hong Kong,  
Shenzhen  
Shi, Jiaqi, University of California, Irvine  
Shi, Lanfei, University of Virginia  
Shi, Maggie, University of Chicago  
Shi, Qiaoni, Bocconi University  
Shi, Shawn, University of Washington  
Shi, Shuping, Macquarie University  
Shi, Wei, University of Miami  
Shi, Zijun, Hong Kong University of Science and  
Technology  
Shibuya, Yoko, Duke University  
Shiller, Ben, Brandeis University  
Shim, John, University of Notre Dame  
Shin, Donghwa, Princeton University

- Shin, Dongwook, Hong Kong University of Science and Technology
- Shin, Hyoduk, University of California, San Diego
- Shin, Jee-Eun, University of Toronto
- Shin, Jiwoong, Yale University
- Shin, Sean, Aalto University
- Shin, Woochoel, University of Florida
- Shishkin, Denis, University of California, San Diego
- Shivdasani, Anil, University of North Carolina at Chapel Hill
- Shive, Sophie, University of Notre Dame
- Shkilko, Andriy, Wilfrid Laurier University
- Shoag, Daniel, Case Western Reserve University
- Shopova, Radostina, Bulgarian Academy of Sciences
- Shor, Mikhael, University of Connecticut
- Shorrer, Ran, Pennsylvania State University
- Shriver, Scott, University of Colorado Boulder
- Shroff, Pervin, University of Minnesota, Twin Cities
- Shu, Chong, University of Utah
- Shu, Jia, Southeast University
- Shu, Susan, Boston college
- Shu, Suzanne, Cornell University
- Shulman, Jeffrey, University of Washington
- Shumway, Tyler, Brigham Young University
- Shurchkov, Olga, Wellesley College
- Shvadron, Dror, Duke University
- Shvets, Julia, University of Cambridge
- Si, Nian, Hong Kong University of Science and Technology
- Siamionava, Katsiaryna, Arizona State University
- Sias, Richard, University of Arizona
- Sickles, Robin, Rice University
- Siddiq, Auyon, University of California, Los Angeles
- Siderius, James, Dartmouth College
- Siegel, Jordan, University of Michigan
- Siegenthaler, Simon, University of Texas at Dallas
- Sikes, Stephanie, University of Illinois Chicago
- Sikochi, Anywhere, Harvard University
- Sikorskaya, Taisiya, London Business School
- Sila, Vathunyoo, University of Edinburgh
- Silberholz, John, University of Michigan
- Silva, Rui, New University of Lisbon
- Silver, Brian, University of Toronto
- Sim, Jaeung, University of Connecticut
- Simaan, Majeed, Stevens Institute of Technology
- Simeth, Markus, Copenhagen Business School
- Simonov, Andrey, Columbia University
- Simonsohn, Uri, University of Pennsylvania
- Şimşek, A. Serdar, University of Texas at Dallas
- Simutin, Mikhail, University of Toronto
- Sinchaisri, Wichinpong, University of California, Berkeley
- Sinclair, Andrew, California Institute of Technology
- Sinclair, Sean, Northwestern University
- Singal, Raghav, Columbia University
- Singh, Amandeep, University of Washington
- Singh, Harpreet, University of Texas at Dallas
- Singh, Juni, California Institute of Technology
- Singh, Shubhranshu, Johns Hopkins University
- Singh, Siddharth Prakash, University College London
- Singh, Simrita, Santa Clara University
- Singh, Vishal, New York University
- Singh, Yahaswini, Brown University
- Singhvi, Divya, New York University Stern School of Business
- Singhvi, Somya, University of Southern California
- Singla, Shikhar, University of Texas at Austin
- Sinha, Kirti, University of Texas at Dallas
- Siriwardane, Emil, Harvard Business School
- Sisak, Dana, Erasmus University Rotterdam
- Sisodia, Ankit, Purdue University
- Sivan, Balasubramanian, Google Research
- Sivaramakrishnan, Shiva, Rice University
- Skimmyhorn, William, College of William and Mary
- Skinner, Nikki, University of Colorado Boulder
- Skoog, Eric, Uppsala University
- Skrastins, Janis, Washington University in St. Louis
- Slepian, Michael, Columbia University
- Sletten, Ewa, Ohio State University
- Slivko, Olga, Erasmus University Rotterdam
- Slooman, Steven, Brown University
- Sloof, Randolph, University of Amsterdam
- Slutzky, Pablo, University of Maryland
- Smajlbegovic, Esad, Erasmus University Rotterdam
- Smeets, Paul, University of Amsterdam
- Smith, Adam, University College London
- Smith, Evelyn, University of Washington
- Smith, James, Dartmouth College
- Smith, Jared, North Carolina State University
- Smith, John, Indiana University
- Smith, Kevin, Stanford University
- Smith, Simon, Federal Reserve Board
- Smith, Stephanie, University of Chicago
- Smolin, Alex, Toulouse School of Economics
- Smolka, Katrin, Warwick Business School
- Snellman, Kaisa, INSEAD
- Snyder, Clare, University of Michigan
- Snyder, Jason, University of Utah
- So, Hyunji, McGill University
- Sockin, Michael, University of Texas at Austin
- Sodero, Annibal, Ohio State University
- Sojourner, Aaron, W. E. Upjohn Institute for Employment Research
- Sokol, D. Daniel, University of Southern California
- Sokolinski, Stanislav, Michigan State University
- Solal, Isabelle, ESSEC Business School
- Solda, Alice, Heidelberg University
- Solomon, David, Boston College
- Soltani, Mohamad, University of Alberta
- Somasundaram, Jeeva, IE University
- Somerville, Jason, Federal Reserve Bank New York

- Somogyi, Fabricius, Northeastern University  
Son, Yoonseock, University of Notre Dame  
Sonderegger, Silvia, University of Nottingham  
Song, Eunhye, Georgia Institute of Technology  
Song, Hummy, University of Pennsylvania  
Song, Yang, University of Washington  
Song, Yicheng, University of Minnesota  
Song, Yingda, Shanghai Jiao Tong University  
Song, Zhaogang, Johns Hopkins University  
Sonmez, Erkut, University of Nebraska–Lincoln  
Sonmez, Nazli, ESMT Berlin  
Souther, Matthew, University of South Carolina  
Sovich, David, University of Kentucky  
Spantig, Lisa, University of Essex  
Spektor, Mikhail, VinUniversity  
Spiegel, Yossi, Tel Aviv University  
Spiess, Jann, Stanford Graduate School of Business  
Spiliotopoulou, Eirini, Tilburg University  
Spiller, Stephen, University of California, Los Angeles  
Sran, Guralp, Leonard N. Stern School of Business  
Srinivasan, Karthik, University of Kansas  
Srivastava, Ankita, Bentley University  
Stachurski, John, Australian National University  
Stan, Mihaela, University College London  
Stanton, Christopher, Harvard Business School  
Starks, Laura, University of Texas at Austin  
Starmans, Jan, Stockholm School of Economics  
Stathopoulos, Konstantinos, University of Manchester  
Stecher, Jack, University of Alberta  
Steele, Dayton, University of Minnesota, Twin Cities  
Steenhoven, Blake, Queen's University  
Stefanescu, Irina, Federal Reserve Board  
Steffel, Mary, Northeastern University  
Steffen, Sascha, Frankfurt School  
Steffen, Sebastian, Massachusetts Institute of Technology  
Stein, Sarah, Virginia Polytechnic Institute and State University  
Steiny, Alex, University of California, Berkeley  
Stellato, Bartolomeo, Princeton University  
Stentoft, Lars, University of Western Ontario  
Stephan, Andrew, University of Colorado Boulder  
Steri, Roberto, University of Luxembourg  
Stewart, Neil, University of Warwick  
Stice, Derrald, University of Hong Kong  
Stice-Lawrence, Lorien, University of Southern California  
Stillman, Paul, San Diego State University  
Sting, Fabian, University of Cologne  
Stipanivic, Fernando, University of Oslo  
Stock, Axel, University of Central Florida  
Stomberg, Bridget, Indiana University Bloomington  
Stoop, Jan, Erasmus University Rotterdam  
Stoumbos, Robert, ESSEC Business School  
Stouraitis, Aristotelis, Hong Kong Baptist University  
Stouras, Konstantinos, University College Dublin  
Stowasser, Till, University of Stirling  
Streitz, Daniel, Halle Institute for Economic Research  
Stroube, Bryan, London Business School  
Strulov-Shlain, Avner, University of Chicago  
Stuber, Sarah, Texas A&M University  
Stueber, Robert, New York University–Abu Dhabi  
Sturm, Timo, Technical University of Darmstadt  
Sturt, Bradley, University of Illinois Chicago  
Su, Yinan, Johns Hopkins University  
Subramani, Gauri, Lehigh University  
Subramanian, Ravi, Georgia Institute of Technology  
Subramanian, Upender, University of Texas at Dallas  
Suetens, Sigrid, Tilburg University  
Suh, Jungkyu, Leonard N. Stern School of Business  
Suher, Jacob, Portland State University  
Sui, Pengfei, Chinese University of Hong Kong, Shenzhen  
Suijs, Jeroen, Tilburg University  
Sulaeman, Johan, National University of Singapore  
Sulz, Sandra, Erasmus University Rotterdam  
Sumida, Mika, University of Southern California  
Sun, Ang, Renmin University of China  
Sun, Chenshuo, New York University Stern School of Business  
Sun, Chuyi, University of North Carolina at Chapel Hill  
Sun, Estelle, Boston University  
Sun, Haoying, University of Kentucky  
Sun, Jian, Singapore Management University  
Sun, Jiankun, Imperial College London  
Sun, Minjee, University of Iowa  
Sun, Pei, University of Manchester  
Sun, Qi, Shanghai University of Finance and Economics  
Sun, Shujing, University of Texas at Dallas  
Sun, Shuo, University of California, Berkeley  
Sun, Will Wei, Purdue University  
Sun, Yacheng, Tsinghua University  
Sun, Zheng, University of California, Irvine  
Sunar, Nur, University of North Carolina at Chapel Hill  
Sunde, Uwe, University of Munich  
Sung, Elie, HEC Paris  
Sungu, Alp, London Business School  
Supera, Dominik, Columbia University  
Sutherland, Andrew, Massachusetts Institute of Technology  
Suzdaltsev, Alexey, HSE University Saint Petersburg  
Sverchkov, Ruslan, Warwick Business School  
Sverdrup, Erik, Monash University  
Swanquist, Quinn, University of Alabama  
Sweeney, Richard, Boston College  
Swinney, Robert, Duke University  
Szydowski, Martin, University of Minnesota

- Szydowski, Martin, Hong Kong University of Science and Technology
- Szymanowska, Marta, Erasmus University Rotterdam
- Tafkov, Ivo, Georgia State University
- Tai, Mingzhu, University of Hong Kong
- Taillard, Jerome, Babson College
- Takeuchi, Ai, Ritsumeikan University
- Tallon, Jean-Marc, Paris School of Economics
- Tambe, Prasanna, University of Pennsylvania
- Tamoni, Andrea, University of Notre Dame
- Tamura, Yuki, New York University–Abu Dhabi
- Tan, Burcu, University of New Mexico
- Tan, Eugene, University of Toronto
- Tan, Hong Ming, National University of Singapore
- Tan, Samuel, Singapore Management University
- Tan, Teck Yong, University of Rochester
- Tan, Tom, Southern Methodist University
- Tan, Yinliang, University of Houston
- Taneri, Niyazi, University of Cambridge
- Tang, Chuang, Peking University
- Tang, Dragon, University of Hong Kong
- Tang, Huan, University of Pennsylvania
- Tang, Jingwen, University of Michigan
- Tang, Johnny, Cornell University
- Tang, Ke, Tsinghua University
- Tang, Lisa, University of Singapore
- Tang, Ping, Bentley University
- Tang, Qinshen, Nanyang Technological University
- Tang, Shirley, Bocconi University
- Tang, Vicki Wei, Georgetown University
- Tang, Wenjie, National University of Singapore
- Tang, Yanhan (Savannah), Southern Methodist University
- Tang, Yuehua, University of Florida
- Tang, Zhihao, Shanghai University of Finance and Economics
- Tang, Zhuodong, University of Michigan
- Tankov, Peter, ENSAE Paris
- Tanrisever, Fehmi, Bilkent University
- Tantri, Prasanna, Indian School of Business
- Tao, Yubo, University of Macau
- Tarantino, Emanuele, LUISS University
- Tarelli, Andrea, Catholic University of Milan
- Taskesen, Bahar, University of Chicago
- Tasoff, Joshua, Claremont Graduate University
- Taussig, Markus, Rutgers University
- Tavin, Bertrand, Emlyon Business School
- Taylor, Greg, University of Oxford
- Taylor, Lucian, University of Pennsylvania
- Tebaldi, Claudio, Università Bocconi
- Tebbs, Joshua, University of South Carolina
- Teh, Tat How, National University of Singapore
- Teh, Tat-How, Nanyang Technological University
- Tello Trillo, Sebastian, University of Virginia
- Tenorio, Rafael A., DePaul University
- Teodorescu, Kinneret, Technion–Israel Institute of Technology
- Teodorescu, Mike, University of Washington
- Teodoridis, Florenta, University of Southern California
- Teodorovicz, Thomaz, Copenhagen Business School
- Teplitskiy, Misha, University of Michigan
- Tercieux, Olivier, Paris School of Economics
- Tereyagoglu, Necati, University of South Carolina
- Terrier, Camille, Queen Mary University of London
- Testoni, Marco, Tilburg University
- Thakor, Richard, University of Minnesota
- Thakral, Neil, Brown University
- Thaler, Michael, University College London
- Thanassoulis, John, University of Warwick
- Thatchenkery, Sruthi, University College London
- Thayaparan, Leann, Massachusetts Institute of Technology
- Theissen, Erik, University of Mannheim
- Thiele, Veikko, Queen's University
- Thielen, Clemens, Technical University of Munich
- Thiemann, Petra, Lund University
- Thoeni, Christian, University of Lausanne
- Thomann, Christian, KTH Royal Institute of Technology
- Thomas, Catherine, London School of Economics
- Thomas, Isabelle, UCLouvain
- Thomas, Jacob, Yale University
- Thompson, Anne, University of Illinois Urbana–Champaign
- Thornock, Jake, Brigham Young University
- Thorp, Susan, University of Sydney Business School
- Thorsten, Koch, Technical University of Berlin
- Thysen, Heidi, Norwegian School
- Tian, Feng, HKU Business School
- Tian, Jiaying, London School of Economics and Political Science
- Tian, Jie, University of Waterloo
- Tian, Lin, Fudan University
- Tian, Tanya, New York University
- Tian, Weidong, University of North Carolina at Charlotte
- Tian, Xiaoli, Georgetown University
- Tice, Frances, University of Colorado Boulder
- Timmermans, Oscar, London School of Economics
- Timoshenko, Artem, Northwestern University
- Tinn, Katrin, McGill University
- Tirunillai, Seshadri, University of Houston
- Todorov, Karamfil, Bank for International Settlements
- Toivanen, Otto, Aalto University
- Tolbert, Pamela, Cornell University
- Toldra, Anna, Universidad Carlos III de Madrid
- Tomar, Sorabh, Southern Methodist University
- Tomy, Rimmy, University of Chicago
- Tong, Li, Peking University

- Tong, Shilu, Chinese University of Hong Kong, Shenzhen
- Tong, Siliang, Nanyang Technological University
- Tong, Tony, University of Colorado
- Tonke, Sebastian, Max Planck Institute for Research on Collective Goods
- Torgler, Benno, Queensland University of Technology
- Toriello, Alejandro, Georgia Institute of Technology
- Torricco, Alfredo, Polytechnique Montréal
- Toussaert, Séverine, University of Oxford
- Towner, Mitch, University of Arizona
- Townsend, Richard, University of California, San Diego
- Towry, Kristy, Emory University
- Toynbee, Sara, University of Texas at Austin
- Trachtman, Hannah, Hebrew University of Jerusalem
- Tranchero, Matteo, University of Pennsylvania
- Transchel, Sandra, Kühne Logistics University
- Tremblay, Mark, University of Nevada, Las Vegas
- Trimborn, Simon, University of Amsterdam
- Tripathi, Arvind, University of Kansas
- Tripodi, Egon, Hertie School
- Troncoso, Isamar, Harvard Business School
- Trzcinka, Charles, Indiana University
- Tsai, Chih-Ling, University of California, Davis
- Tsai, Hsin-Tien, National University of Singapore
- Tse, Alex, University College London
- Tseng, Kevin, Chinese University of Hong Kong
- Tserlukevich, Yuri, Arizona State University
- Tsou, Chi-Yang, University of Manchester
- Tsouderou, Athena, IE University
- Tsoy, Anton, University of Toronto
- Tsui, David, University of Southern California
- Tu, Jun, Singapore Management University
- Tucker, Emily, Clemson University
- Tucker, Steven, University of Waikato
- Tucker-Foltz, Jamie, Harvard University
- Tufano, Fabio, University of Leicester
- Tuk, Mirjam, Erasmus University Rotterdam
- Tulabandhula, Theja, University of Illinois Chicago
- Tumlinson, Justin, University of Exeter
- Tuna, Irem, London Business School
- Tunc, Murat, Tilburg University
- Tunuguntla, Srinivas, Duke University
- Turcic, Danko, University of California, Riverside
- Turhan, Bertan, Iowa State University
- Turmunkh, Uyanga, IÉSEG School of Management
- Tut, Daniel, Ryerson University
- Twedt, Brady, Texas A&M University
- Tyagi, Rajeev, University of California, Irvine
- Udenio, Maximiliano, KU Leuven
- Udwani, Rajan, University of California, Berkeley
- Uetake, Kosuke, Yale University
- Uichanco, Joline, University of Michigan
- Ukanwa, Kalinda, University of Southern California
- Ulate, Mauricio, Federal Reserve Bank San Francisco
- Ulbricht, Robert, Boston College
- Umar, Tarik, Rice University
- Unlu, Emre, University of Nebraska–Lincoln
- Upadhyay, Arun, Florida International University
- Upadhyay, Jalaj, Rutgers University
- Uppal, Abhinav, Indian School of Business
- Uppal, Raman, EDHEC Business School
- Uppari, Bhavani Shanker, Singapore Management University
- Urban, Daniel, Erasmus University Rotterdam
- Urcan, Oktay, University of Illinois Urbana–Champaign
- Uribe, Jose, University of Michigan
- Urrea, Gloria, University of Colorado Boulder
- Ursu, Raluca, New York University Stern School of Business
- Urzua, Francisco, City University of London
- Ustun, Berk, University of California, San Diego
- Vaccaro, Michelle, Massachusetts Institute of Technology
- Vaid, Sumer, Harvard Business School
- Vakili, Keyvan, London Business School
- Valdes, Leon, University of Pittsburgh
- Valenti, Albert, University of Navarra
- Valentine, Kristen, University of Georgia
- Vallee, Boris, Harvard Business School
- Valsesia, Francesca, University of Washington
- Valta, Philip, University of Bern
- van de Kuilen, Gijs, Erasmus University Rotterdam
- Van den Bergh, Bram, Erasmus University
- van der Beck, Philippe, Harvard Business School
- van der Geest, Jesse, Tilburg University
- van Dolder, Dennie, University of Essex
- van Kervel, Vincent, Pontifical Catholic University of Chile
- van Kippersluis, Hans, Erasmus University Rotterdam
- Van Landuyt, Ben, University of Arizona
- van Leeuwen, Boris, Tilburg University
- van Oordt, Maarten, Vrije Universiteit Amsterdam
- van Ours, Jan, Erasmus University Rotterdam
- van Rooij, Maarten, Dutch Central Bank
- van Veldhuizen, Roel, Lund University
- Vana, Prasad, London Business School
- Vance, Marshall, Virginia Polytechnic Institute and State University
- Vandello, Joseph, University of South Florida
- Vanderveken, Rodolphe, UCLouvain
- Vanepps, Eric, Vanderbilt University
- Vanneste, Bart, University College London
- Vansteenkiste, Cara, University of Sydney
- Vanstraelen, Ann, Maastricht University
- Varas, Felipe, Universidad des los Andes, Santiago de Chile
- Vardi, Shai, Purdue University
- Vasi, Ion Bogdan, University of Iowa

- Vasquez, Jose P., London School of Economics and Political Science
- Vasserman, Shoshana, Stanford Graduate School of Business
- Vats, Nishant, Washington University in St. Louis
- Vayanos, Phebe, University of Southern California
- Vecci, Joseph, University of Gothenburg
- Vedantam, Aditya, State University of New York at Buffalo
- Vedrashko, Alexander, Simon Fraser University
- Velez, Rodrigo, University of Texas at San Antonio
- Velichety, Srikar, University of Arizona
- Velthuis, Raisa, Villanova University
- Venkat, Parth, University of Alabama
- Venkatachalam, Mohan, Duke University
- Venkataraman, Ashwin, University of Texas at Dallas
- Venkataraman, Kumar, Southern Methodist University
- Venkataraman, Shankar, Bentley University
- Venkataraman, Sriram, University of South Carolina
- Venkatesan, Shyam Sunder, Western University
- Vera, Jorge, Pontifical Catholic University of Chile
- Verbeke, Wouter, Vrije Universiteit Brussel
- Veretennik, Lena, KU Leuven
- Verhaal, J., Tulane University
- Verhoeven, Dennis, KU Leuven
- Vesterlund, Lise, University of Pittsburgh
- Viana, Ana, INESC Porto
- Vidal, Thibaut, Polytechnique Montréal
- Vieider, Ferdinand, Ghent University
- Vierø, Marie-Louise, Aarhus University
- Vijairaghavan, Vaarun, University of Calgary
- Vikander, Nick, University of Copenhagen
- Vilkov, Grigory, Frankfurt School
- Villa, Alessandro, Federal Reserve Bank of Chicago
- Villalonga, Belen, New York University
- Vincenzi, Roberto, Bocconi University
- Virani, Aazam, University of Arizona
- Virudachalam, Vanitha, University of Illinois Urbana–Champaign
- Visser, Bauke, Erasmus University Rotterdam
- Viswanathan, S., Duke University
- Viswanath-Natraj, Ganesh, Warwick Business School
- Vitercik, Ellen, Stanford University
- Vitorino, Maria Ana, INSEAD
- Viva, Luca Del, Ramon Llull University
- Vlassopoulos, Michael, University of Southampton
- Vogel, Ryan, Temple University
- Voigt, Maximilian, Frankfurt School
- Voleti, Sudhir, Indian School of Business
- Volkova, Ekaterina, University of Melbourne
- Von Siemens, Ferdinand, University of Frankfurt
- Von Zahn, Moritz, Goethe University
- Vorst, Patrick, Maastricht University
- Vosgerau, Joachim, Bocconi University
- Vossen, Thomas, University of Colorado
- Vostroknutov, Alexander, Maastricht University
- Vu, Tri, University of Maryland, College Park
- Vuilleme, Guillaume, HEC Paris
- Vyas, Dushyant, University of Toronto
- Waddoups, Nate, University of Denver
- Wagner, Alexander, University of Zurich
- Wagner, Christian, Copenhagen Business School
- Wagner, Gernot, Columbia University
- Wagner, Laura, Universidade Catolica Portuguesa
- Wagner, Michael, University of Washington
- Wagner, Stefan, ESMT Berlin
- Wagner, Ulrich, University of Mannheim
- Wagner, Wolf, Tilburg University
- Waguespack, David, University of Maryland
- Wahid, Aida, University of Toronto
- Wahlen, James, Indiana University
- Waisman, Caio, Northwestern University
- Wakker, Peter, Erasmus University Rotterdam
- Wald, Kristina, University of Chicago
- Walden, Johan, University of California, Berkeley
- Waldfoegel, Joel, University of Minnesota
- Waldherr, Stefan, Vrije Universiteit Amsterdam
- Walker, Matthew, Newcastle University
- Wallace, Nancy, University of California, Berkeley
- Wallen, Jonathan, Harvard Business School
- Wallskog, Melanie, Duke University
- Walters, Daniel, INSEAD
- Walther, Ansgar, Imperial College London
- Wan, Xiang (Shawn), Santa Clara University
- Wan, Zhixi, University of Hong Kong
- Wang Huber, Amy, University of Pennsylvania
- Wang, Albert, Auburn University
- Wang, Ao, National University of Singapore
- Wang, Baolian, University of Florida
- Wang, Chao, University of Pennsylvania
- Wang, Charles, Harvard Business School
- Wang, Chen, University of Notre Dame
- Wang, Chengsi, Monash University
- Wang, Dan, Columbia University
- Wang, Danqing, Hong Kong University of Science and Technology
- Wang, Danye, University of Iowa
- Wang, Emily Jing, Hong Kong University of Science and Technology
- Wang, Emily Yucai, University of Massachusetts Amherst
- Wang, Gang, University of Delaware
- Wang, Gavin, University of Texas at Dallas
- Wang, Guihua, University of Texas at Dallas
- Wang, Hai, Singapore Management University
- Wang, He, Georgia Institute of Technology
- Wang, Heli, Singapore Management University
- Wang, Hongchang, University of Texas at Dallas
- Wang, Isabel, Michigan State University
- Wang, Jessie, Board of Governors of the Federal Reserve System

- Wang, Jianfu, City University of Hong Kong  
Wang, Jing, Hong Kong University of Science and Technology  
Wang, Jingjing, University of Calgary  
Wang, Jingqi, Chinese University of Hong Kong, Shenzhen  
Wang, Jingyuan, Yale University  
Wang, Junbo, Louisiana State University  
Wang, Kaizheng, Columbia University  
Wang, Kitty, University of Houston  
Wang, Laura, University of Illinois Urbana–Champaign  
Wang, Lynn, University of Hong Kong  
Wang, Mengxin, University of Texas at Dallas  
Wang, Olivier, New York University  
Wang, Pingle, University of Texas at Dallas  
Wang, Qiaochu, New York University  
Wang, Qili, University of Florida  
Wang, Qiong, University of Illinois  
Wang, Roman, Texas Tech University  
Wang, Rose, Stanford University  
Wang, Ruodu, University of Waterloo  
Wang, Ruxian, Johns Hopkins University  
Wang, Shengbo, Stanford University  
Wang, Shiheng, Hong Kong University of Science and Technology  
Wang, Shixin, The Chinese University of Hong Kong  
Wang, Shouqiang, University of Texas at Dallas  
Wang, Shuming, University of the Chinese Academy of Sciences  
Wang, Shuyan, University of Minnesota  
Wang, Teng, Federal Reserve Board  
Wang, Tianyu, Tsinghua University  
Wang, Tong, Yale University  
Wang, Tracy, University of Minnesota  
Wang, Wei, Queen’s University  
Wang, Wei, Temple University  
Wang, Weiguang, Johns Hopkins University  
Wang, Wen, University of Maryland, College Park  
Wang, Wenyu, Indiana University  
Wang, Xiaolu, Iowa State University  
Wang, Xin, Southwestern University of Finance and Economics  
Wang, Xinchang, University of Michigan  
Wang, Xingyu, Northwestern University  
Wang, Xinshang, Alibaba Group  
Wang, Yajun, Baruch College  
Wang, Yanbo, HKU Business School  
Wang, Yanwen, University of British Columbia  
Wang, Yanzhi, National Taiwan University  
Wang, Ye, University of North Carolina at Chapel Hill  
Wang, Yenan, University of Amsterdam  
Wang, Yichu, Tsinghua University  
Wang, Yifei, University of Maryland, College Park  
Wang, Yimin, Arizona State University  
Wang, Yingfei, University of Washington  
Wang, Yining, University of Texas at Dallas  
Wang, Yixin, University of Michigan  
Wang, Yixin Iris, University of Illinois Urbana–Champaign  
Wang, Yolanda, Shenzhen University  
Wang, Yulan, Hong Kong Polytechnic University  
Wang, Yuyan, Stanford University  
Wang, Zhe, Pennsylvania State University  
Wang, Zhihan (Helen), University of Michigan  
Wang, Zhongbin, Tianjin University  
Wangerin, Daniel, University of Wisconsin–Madison  
Warachka, Mitch, Chapman University  
Ward, Colin, University of Minnesota, Twin Cities  
Ward, George, Oxford University  
Warnes, Xavier, Stanford University  
Warren, James, Texas A&M University  
Wasserman, Melissa, University of Texas at Austin  
Watkins, Jessica, University of Notre Dame  
Watson, Jeremy, University of Minnesota  
Watts, Edward, Yale University  
Watuqala, Sumudu, Indiana University Bloomington  
Watzinger, Martin, University of Münster  
Weaver, Andrew, University of Illinois Urbana–Champaign  
Weaver, Ian, National University of Singapore  
Webb, Craig, University of Manchester  
Webb, Ryan, University of Toronto  
Weber, Michael, University of Chicago  
Weber, Till, Newcastle University  
Wehrheim, David, IESE Business School  
Wei, Dong, University of California, Berkeley  
Wei, Kelsey, University of Texas at Dallas  
Wei, Lai, Lingnan University  
Wei, Lai, Boston College  
Wei, Sarah, University of Warwick  
Wei, Wei, University of Oklahoma  
Wei, Yanhao, University of Southern California  
Wei, Yehua, Duke University  
Wei, Zaiyan, Purdue University  
Weidmann, Ben, Harvard University  
Weigert, Florian, University of Neuchâtel  
Weinschenk, Philipp, Technical University of Kaiserslautern  
Weiss, Dan, Tel Aviv University  
Weitzner, Gregory, McGill University  
Welch, Kyle, George Washington University  
Weller, Ingo, University of Munich  
Welsch, Anthony, University of Chicago  
Wen, Wen, University of Texas at Austin  
Wen, Xudong, Hong Kong University of Science and Technology  
Wentland, Kelly, George Mason University  
Werner, Peter, Maastricht University  
Werner, Timothy, University of Texas at Austin  
Wernerfelt, Nils, Massachusetts Institute of Technology

- Wernicke, Georg, HEC Paris  
 Wertz, John, Indiana University Bloomington  
 West, Joel, Keck Graduate Institute  
 Wheeler, P., Tulane University  
 Whelan, Paul, Imperial College London  
 Whillans, Ashley, Harvard Business School  
 Whipple, Benjamin, University of Georgia  
 White, Joshua, Vanderbilt University  
 White, Lucy, Boston University  
 White, Roger, Arizona State University  
 Wiberg, Holly, Carnegie Mellon University  
 Wiedemann, Moritz, Imperial College London  
 Wijnsma, Sytske, University of California, Berkeley  
 Wilbur, Kenneth, University of California, San Diego  
 Wilde, Jaron, University of Iowa  
 Wildenbeest, Matthijs R., University of Arizona  
 Wiles, Emma, Boston University  
 Wilkening, Tom, University of Melbourne  
 Wilkins, Mike, University of Kansas  
 Williams, Braden, University of Texas at Austin  
 Williams, Brian, Texas A&M University  
 Williams, Jared, University of South Florida  
 Williams, Jeffrey, Utah Valley University  
 Williams, Jonathan, University of Georgia  
 Willinger, Marc, University of Montpellier  
 Wilmers, Nathan, Massachusetts Institute of Technology  
 Wilson, James, North Carolina State University  
 Wilson, Ryan, University of Iowa  
 Winship, Christopher, Harvard University  
 Wittwer, Milena, Boston College  
 Woeppel, Michael, Indiana University  
 Wohlfart, Johannes, University of Cologne  
 Wolfe, Michael, Oklahoma State University  
 Wollmann, Thomas, University of Chicago  
 Won, Shinjae, University of Illinois Urbana–Champaign  
 Wong, Ashley, Tilburg University  
 Wong, Maisy, University of Pennsylvania  
 Wong, Michael, University of Hong Kong  
 Wong, Tak-Yuen, National Tsing Hua University  
 Wood, David, Brigham Young University  
 Woodward, Kyle, Assign Group  
 Wooten, Joel, University of South Carolina  
 Workiewicz, Maciej, ESSEC Business School  
 Wowak, Adam, University of Notre Dame  
 Wright, Nataliya, Columbia University  
 Wu, Wenhao, ShanghaiTech University  
 Wu, Bingxiao, Rutgers University  
 Wu, Botao, The Chinese University of Hong Kong  
 Wu, Chenguang (Allen), Hong Kong University of Science and Technology  
 Wu, Di, University of Michigan  
 Wu, Diana Yan, San Jose State University  
 Wu, Eliza, University of Sydney  
 Wu, Hong, Fudan University  
 Wu, Hugh Xiaolong, Washington University in St. Louis  
 Wu, Jane, University of California, Los Angeles  
 Wu, Jiahua, Imperial College London  
 Wu, Jing, Chinese University of Hong Kong  
 Wu, Julie, University of Nebraska–Lincoln  
 Wu, Linjia, Stanford University  
 Wu, Lynn, University of Pennsylvania  
 Wu, Qi, Case Western Reserve University  
 Wu, Qinxin, Baylor University  
 Wu, Qinyu, University of Science and Technology of China  
 Wu, Ruiqi, University of Delaware  
 Wu, Sang, Columbia University  
 Wu, Xi, Central University of Finance and Economics  
 Wu, Xiting, Shandong University  
 Wu, Yanhui, University of Hong Kong  
 Wu, Yaozhong, National University of Singapore  
 Wu, Youchang, University of Oregon  
 Wu, Yue, University of Pittsburgh  
 Wu, Yufeng, Ohio State University  
 Wuebker, Robert, University of Utah  
 Wuttke, David, Technical University of Munich  
 Xia, Han, University of Texas at Dallas  
 Xia, Ying, Monash University  
 Xia, Zizhe, University of Chicago  
 Xiang, Haotian, Peking University  
 Xiang, Hong, Hong Kong Polytechnic University  
 Xiang, Jia, Indiana University Bloomington  
 Xiao, Erte, Monash University  
 Xiao, Guang, Hong Kong Polytechnic University  
 Xiao, Jun, University of Melbourne  
 Xiao, Kairong, Columbia University  
 Xiao, Rachel Jiqui, Fordham University  
 Xiao, Steven, University of Texas at Dallas  
 Xiao, Yangge, National University of Singapore  
 Xiao, Yizhou, Chinese University of Hong Kong  
 Xiaolan, Mindy, University of Texas at Austin  
 Xiaolin, Li, Hong Kong Polytechnic University  
 Xie, Chloe, Massachusetts Institute of Technology  
 Xie, Fei, University of Delaware  
 Xie, Jiaheng, University of Delaware  
 Xie, Jin, Stanford University  
 Xie, Jingui, Technical University of Munich  
 Xie, Peng, California State University, East Bay  
 Xie, Weijun, Georgia Institute of Technology  
 Xie, Wensi, Chinese University of Hong Kong  
 Xie, Yao, Georgia Institute of Technology  
 Xie, Yaqi, University of Chicago  
 Xie, Yifang, Georgetown University  
 Xie, Ying, University of Texas at Dallas  
 Xie, Yingkang, Washington University in St. Louis  
 Xin, Baohua, University of Toronto  
 Xin, Linwei, University of Chicago  
 Xing, Hao, Boston University  
 Xiong, Cindy, Georgia Institute of Technology

- Xiong, Grazia, Utah State University  
Xiong, Ruoxuan, Emory University  
Xiong, Yan, University of Hong Kong  
Xu, Bin, University of Leeds  
Xu, Douglas, University of Florida  
Xu, Fangming, University of Bristol  
Xu, Fasheng, University of Connecticut  
Xu, Haoyu, Shanghai University of Finance and Economics  
Xu, Hui, Lancaster University Management School  
Xu, Huifu, Chinese University of Hong Kong  
Xu, Jiajie, University of Iowa  
Xu, Jiaming, Duke University  
Xu, Jiangmin, Peking University  
Xu, Jie, George Mason University  
Xu, Jin, Virginia Polytechnic Institute and State University  
Xu, Lai, Syracuse University  
Xu, Liang, Singapore Management University  
Xu, Linli, University of Minnesota  
Xu, Nianhang, Renmin University of China  
Xu, Pan, University of Maryland, College Park  
Xu, Qiping, University of Illinois Urbana–Champaign  
Xu, Renyuan, New York University  
Xu, Ting, University of Toronto  
Xu, Wenxin, University of South Carolina  
Xu, Yeja, Harvard Business School  
Xu, Yi, University of Maryland  
Xu, Yilong, Utrecht University  
Xu, Yunzong, University of Illinois Urbana–Champaign  
Xu, Yuqian, University of North Carolina at Chapel Hill  
Xu, Zhaoxia, University of New South Wales  
Xu, Zhengyang, City University of Hong Kong  
Xu, Zibin, City University of Hong Kong  
Xue, Ling, University of Georgia  
Xue, Mengying, Fudan University  
Xue, Nina, Monash University  
Yahav, Inbal, Tel Aviv University  
Yaish, Aviv, Yale University  
Yakovlev, Maksim, Vanderbilt University  
Yamaguchi, Shotaro, University of Maryland  
Yamarthy, Ram, Federal Reserve Board  
Yan, Chen, University of Michigan  
Yan, Chiwei, University of California, Berkeley  
Yan, Dong, Erasmus University Rotterdam  
Yan, Han, University of British Columbia  
Yan, Hongjun, DePaul University  
Yan, Lu (Lucy), Indiana University  
Yan, Yuling, Princeton University  
Yang, Adelle Xue, National University of Singapore  
Yang, Baozhong, Georgia State University  
Yang, Bicheng, Hong Kong Polytechnic University  
Yang, Endong, University of Macau  
Yang, Fan, University of Connecticut  
Yang, Holly, Singapore Management University  
Yang, Jeremy, Harvard Business School  
Yang, Jingni, University of Sydney  
Yang, Jingyuan, George Mason University  
Yang, Joonhyuk, University of Notre Dame  
Yang, Jun, Indiana University  
Yang, Kai Hao, Yale University  
Yang, Keer, University of California, Davis  
Yang, Liu, University of Maryland, College Park  
Yang, Liuming, Chinese University of Hong Kong  
Yang, Lusi, University of Arizona  
Yang, Luyi, University of California, Berkeley  
Yang, Mingwen, University of Washington  
Yang, Mochen, University of Minnesota  
Yang, Nan, University of Miami  
Yang, Nathan, Cornell University  
Yang, S. Alex, London Business School  
Yang, Tiantian, University of Pennsylvania  
Yang, Tina, University of South Florida  
Yang, Vicky Chuqiao, Massachusetts Institute of Technology  
Yang, Wei, College of William and Mary  
Yang, Xiaotang, University of Toronto  
Yang, Yang, University of Florida  
Yang, Yi, Hong Kong University of Science and Technology  
Yang, Yong, Chinese University of Hong Kong  
Yang, Youwei, Cornell University  
Yang, Yuanchen, International Monetary Fund  
Yang, Zhibin (Ben), University of Oregon  
Yang, Zhifeng, State University of New York at Stony Brook  
Yang, Zoe, Chinese University of Hong Kong  
Yaniv, Ilan, Hebrew University of Jerusalem  
Yannelis, Constantine, University of Chicago  
Yao, Jianfeng, Chinese University of Hong Kong, Shenzhen  
Yao, Jiayu, Nanyang Technological University  
Yao, Shiqing, Monash University  
Yao, Song, Washington University in St. Louis  
Yao, Tianhao, Singapore Management University  
Yao, Tong, University of Iowa  
Yao, Vincent, Georgia State University  
Yao, Yunfei (Jesse), Chinese University of Hong Kong  
Yaraghi, Niam, University of Miami  
Yasuda, Ayako, University of California, Davis  
Yazdani, Alireza, University of Oregon  
Ye, Naide, Shanghai Jiao Tong University  
Ye, Shun, George Mason University  
Ye, Teng, University of Minnesota, Twin Cities  
Ye, Tiange, University of Southern California  
Ye, Zikun, University of Washington  
Yehezkel, Yaron, Tel-Aviv University  
Yehuda, Nir, University of Delaware  
Yeo, Lisa, University of California, Merced  
Yeung, Eric, Cornell University

- Yeung, Kelvin, City University of Hong Kong  
 Yewell, Katherine, Florida State University  
 Yi, Cheng, Tsinghua University  
 Yildirim, Pinar, University of Pennsylvania  
 Yildiz, Kemal, Bilkent University  
 Yilmaz, Kamil, Koç University  
 Yilmaz, Ovunc, University of Colorado Boulder  
 Yimfor, Emmanuel, University of Michigan  
 Yin, Chengdong, Renmin University of China  
 Yin, David, Miami University  
 Yin, Rui, Arizona State University  
 Yin, Xiao, University College London  
 Yin, Yidan, University of Southern California  
 Yonder, Erkan, Concordia University  
 Yoo, Changseung, McGill University  
 Yoo, Onesun, University College London  
 Yoon, Aaron, Northwestern University  
 Yoon, Chunggeun, KDI School of Public Policy and Management  
 Yoon, Haewon, Indiana University Bloomington  
 Yoon, Jisung, Northwestern University  
 Yost, Benjamin, Massachusetts Institute of Technology  
 You, Xuesong, Freddie Mac  
 You, Yang, University of Hong Kong  
 Young, Richard, Ohio State University  
 Yu, Christina, Cornell University  
 Yu, Jialin, Hong Kong University of Science and Technology  
 Yu, Jianfeng, Tsinghua University  
 Yu, Jiayi, Fudan University  
 Yu, Jungju, Korea Advanced Institute of Science and Technology  
 Yu, Lun, Tsinghua University  
 Yu, Peiwen, Chongqing University  
 Yu, Qi, Singapore Management University  
 Yu, Qiuping, Georgetown University  
 Yu, Sandy, University of Minnesota  
 Yu, Shihao, Singapore Management University  
 Yu, Siyu, University of Michigan  
 Yu, Sophie, University of Pennsylvania  
 Yu, Tingyu, University of Zurich  
 Yu, Xiabo, University of Colorado Boulder  
 Yu, Xiao, Erasmus University Rotterdam  
 Yu, Xiaoyun, Shanghai Advanced Institute of Finance  
 Yu, Yao, University of Massachusetts Amherst  
 Yu, Yifan, University of Texas at Austin  
 Yu, Yimin, City University of Hong Kong  
 Yu, Yinan, University of Oklahoma  
 Yu, Yingri, University of Virginia  
 Yuan, Di, University of Illinois Urbana–Champaign  
 Yuan, Kathy, London School of Economics and Political Science  
 Yuan, Tao, Nanjing University  
 Yuan, Zhaoneng, Nanyang Technological University  
 Yucel, Safak, Georgetown University  
 Yue, Daniel, Georgia Institute of Technology  
 Yue, Wei T., City University of Hong Kong  
 Yueshen, Bart, Singapore Management University  
 Yuferova, Darya, NHH Norwegian School of Economics  
 Yuksel, Sevgi, New York University  
 Zaccagni, Sarah, University of Copenhagen  
 Zaccaria, Luana, Einaudi Institute for Economics and Finance  
 Zach, Tzachi, Ohio State University  
 Zacharias, Christos, University of Miami  
 Zaffaroni, Paolo, Imperial College London  
 Zakolyukina, Anastasia, University of Chicago  
 Zaldokas, Alminas, Hong Kong University of Science and Technology  
 Zaman, Tauhid, Yale University  
 Zambrana, Rafael, University of Notre Dame  
 Zanmarone, Giorgio, HEC Lausanne  
 Zandberg, Jonathan, University of Pennsylvania  
 Zanella, Martina, Trinity College Dublin  
 Zang, Amy, Hong Kong University of Science and Technology  
 Zanjani, George, University of Alabama  
 Zanotti, Greg, Stanford University  
 Zantedeschi, Daniel, University of South Florida  
 Zargoush, Manaf, McMaster University  
 Zariphopoulou, Thaleia, University of Texas at Austin  
 Zarutskie, Rebecca, Federal Reserve Bank of Dallas  
 Zator, Michal, University of Notre Dame  
 Zawadowski, Adam, Central European University  
 Zehnder, Christian, University of Lausanne  
 Zeijen, Axel, ETH Zurich  
 Zein, Jason, University of New South Wales  
 Zeng, Helen, Carnegie Mellon University  
 Zeng, Yao, University of Pennsylvania  
 Zerbib, Olivier David, Boston University  
 Zervas, Georgios, Boston University  
 Zeume, Stefan, University of Michigan  
 Zhan, Dongyuan, University College London  
 Zhan, Ruohan, Stanford University  
 Zhan, Xintong, Fudan University  
 Zhang, Adam, University of Minnesota  
 Zhang, Alan, Florida International University  
 Zhang, Angela, University of Southern California  
 Zhang, Anthony, University of Chicago  
 Zhang, Bohui, Chinese University of Hong Kong, Shenzhen  
 Zhang, Can, Duke University  
 Zhang, Chendi, University of Exeter  
 Zhang, Chenglong, University of Texas at Dallas  
 Zhang, Chong, Tilburg University  
 Zhang, Cyndi, Singapore Management University  
 Zhang, Dake, Shanghai Jiao Tong University  
 Zhang, Donghang, University of South Carolina  
 Zhang, Emma, Monash University  
 Zhang, Emma Jingfei, Emory University  
 Zhang, Feng, Southern Methodist University

- Zhang, Gaoqing, University of Minnesota  
Zhang, Hailun, Chinese University of Hong Kong, Shenzhen  
Zhang, Haiwen, University of Minnesota, Twin Cities  
Zhang, Han, Michigan State University  
Zhang, Hanqin, National University of Singapore  
Zhang, Harold, University of Texas at Dallas  
Zhang, He, California State Polytechnic University Pomona  
Zhang, Heng, Arizona State University  
Zhang, Hong, Singapore Management University  
Zhang, Hongsong, University of Hong Kong  
Zhang, Huai, Nanyang Technological University  
Zhang, Huanan, University of Colorado Boulder  
Zhang, James, University of Texas at Dallas  
Zhang, Jenny Li, University of British Columbia  
Zhang, Jian, University of Hong Kong  
Zhang, Jiding, Arizona State University  
Zhang, Jie, University of Texas at Arlington  
Zhang, Jieying, University of Texas at Dallas  
Zhang, Jiheng, Hong Kong University of Science and Technology  
Zhang, Jin, Monash University  
Zhang, Jingjing, Indiana University  
Zhang, Jingwei, Chinese University of Hong Kong, Shenzhen  
Zhang, Jingwei, Cornell University  
Zhang, Jinyuan, University of California, Los Angeles  
Zhang, Kun, Renmin University of China  
Zhang, Laurina, Boston University  
Zhang, Letian, Harvard University  
Zhang, Linjun, Rutgers University  
Zhang, Linyi, Chinese University of Hong Kong, Shenzhen  
Zhang, Luhao, Columbia University  
Zhang, Meilin, National University of Singapore  
Zhang, Mengxia, Western University  
Zhang, Mengxiao, University of Southern California  
Zhang, Miao, University of Southern California  
Zhang, Mindy Xiaolan, University of Texas at Austin  
Zhang, Ning, Queen's University  
Zhang, Pengfei, University of Texas at Dallas  
Zhang, Peter Y., Carnegie Mellon University  
Zhang, Rachel, National University of Singapore  
Zhang, Renyu, The Chinese University of Hong Kong  
Zhang, Ruishen, University of Hong Kong  
Zhang, Ruixun, Peking University  
Zhang, Shaojun, Ohio State University  
Zhang, Sheryl, ESSEC Business School  
Zhang, Shuang, Imperial College London  
Zhang, Shunyuan, Harvard Business School  
Zhang, Song, University of Delaware  
Zhang, Tianyu, Chinese University of Hong Kong, Shenzhen  
Zhang, Tony, Federal Reserve Board  
Zhang, Walter, University of Chicago  
Zhang, Wei, University of Hong Kong  
Zhang, Weiming, IE Business School  
Zhang, Wenchang, Indiana University Bloomington  
Zhang, Wenli, Iowa State University  
Zhang, Wenrui, Colorado State University  
Zhang, Xiao-Jun, University of California, Berkeley  
Zhang, Xiaoyu, National University of Singapore  
Zhang, Xinran, Central University of Finance and Economics  
Zhang, Xinyu, Cornell University  
Zhang, Xu, London Business School  
Zhang, Xuan, Columbia University  
Zhang, Yang, University of Kent  
Zhang, Yapei, Shanghai Tech University  
Zhang, Ye, Stockholm School of Economics  
Zhang, Yiling, University of Minnesota, Twin Cities  
Zhang, Ying, Santa Clara University  
Zhang, Yingjie, Peking University  
Zhang, Yu, Peking University  
Zhang, Yuchen, Tulane University  
Zhang, Yue, Pennsylvania State University  
Zhang, Yunhao, University of California, Berkeley  
Zhang, Yupu, University of Hong Kong  
Zhang, Zhao, University of Southern California  
Zhang, Zhe, University of Texas at Dallas  
Zhang, Zhe, University of California, San Diego  
Zhang, Zhe, Singapore Management University  
Zhang, Zhengjun, University of Wisconsin–Madison  
Zhang, Zhoupeng (Jack), State University of New York at Buffalo  
Zhao, Haibei, Lehigh University  
Zhao, Jinglong, Boston University  
Zhao, Keran, Pennsylvania State University  
Zhao, Lin, Southwestern University of Finance and Economics  
Zhao, Linda, University of Chicago  
Zhao, Long, National University of Singapore  
Zhao, Rong, University of Calgary  
Zhao, Wanli, Bocconi University  
Zhao, Wuyang, McGill University  
Zhao, Xia, University of Georgia  
Zhao, Xiaofei, Georgetown University  
Zhao, Xinyi, Leonard N. Stern School of Business  
Zhao, Ying, Hong Kong University of Science and Technology  
Zhelyazkov, Pavel, Hong Kong University of Science and Technology  
Zheng, Andrew, Massachusetts Institute of Technology  
Zheng, Jinyang, University of Rochester  
Zheng, Kenneth, University of Wyoming  
Zheng, Lingling, Renmin University of China  
Zheng, Weiting, University of New South Wales  
Zheng, Xiang, Nanyang Technological University  
Zheng, Xin, University of British Columbia

- Zheng, Xinhua, Hong Kong University of Science and Technology
- Zheng, Yue, Hong Kong University of Science and Technology
- Zheng, Zeyu, University of California, Berkeley
- Zheng, Zhichao, Singapore Management University
- Zhong, Hongda, University of Texas at Dallas
- Zhong, Rong (Irene), University of Illinois Chicago
- Zhong, Yueyang, London Business School
- Zhong, Zachary, University of Toronto
- Zhou, Angela, University of Southern California
- Zhou, Baoyu, Arizona State University
- Zhou, Bobby, University of Maryland, College Park
- Zhou, Dexin, Baruch College
- Zhou, Flora, Bentley University
- Zhou, Frank, University of Pennsylvania
- Zhou, Guofu, Washington University in St. Louis
- Zhou, Meizi, Boston University
- Zhou, Mi, University of British Columbia
- Zhou, Qing, Macquarie University
- Zhou, Shibo, Copenhagen Business School
- Zhou, Tingyu, Florida State University
- Zhou, Tong, Shanghai Tech University
- Zhou, Tongxin, Arizona State University
- Zhou, Wei, University of Arizona
- Zhou, Wen, University of Hong Kong
- Zhou, Wenjun, University of Tennessee
- Zhou, Wenyu, Zhejiang University
- Zhou, Xing, Southern Methodist University
- Zhou, Yangfang, Singapore Management University
- Zhou, Ying, University of Connecticut
- Zhou, Yuan, Tsinghua University
- Zhou, Yun, McMaster University
- Zhou, Yuqing, University of California, Los Angeles
- Zhou, Zhen, Tsinghua University
- Zhou, Zhengyuan, Stanford University
- Zhou, Zihao, University College London
- Zhou, Zoey Yiyuan, Hong Kong University of Science and Technology
- Zhu, Guozhong, University of Alberta
- Zhu, Kai, Bocconi University
- Zhu, Mingxi, Georgia Institute of Technology
- Zhu, Qifei, National University of Singapore
- Zhu, Qinghua, Shanghai Jiao Tong University
- Zhu, Ruihao, Cornell University
- Zhu, Shixiang, Carnegie Mellon University
- Zhu, Ting, Purdue University
- Zhu, Weiming, University of Navarra
- Zhu, Xinrong, Imperial College London
- Zhu, Yi, University of Minnesota, Twin Cities
- Zhu, Yifeng, Central University of Finance and Economics
- Zhu, Yinchu, Brandeis University
- Zhu, Yunxia, University of Nebraska–Lincoln
- Zhu, Yuting, National University of Singapore
- Zhuang, Jun, State University of New York at Buffalo
- Zhuang, Lei, Fudan University
- Zia, Mohammad, Chapman University
- Ziani, Juba, Georgia Institute of Technology
- Ziano, Ignazio, University of Geneva
- Zierahn, Ulrich, Utrecht University School of Economics
- Zimmerman, Peter, Federal Reserve Bank of Cleveland
- Zimmerman, Seth, Yale University
- Zimmermann, Kaspar, Frankfurt School
- Zitzewitz, Eric, Dartmouth College
- Zlatev, Julian, Harvard University
- Zoetl, Gregor, University of Erlangen-Nuremberg
- Zogheib, Jean-Marc, Paris Nanterre University
- Zoican, Marius, University of Calgary
- Zorc, Sasa, University of Virginia
- Zorzi, Amedeo, Toulouse School of Economics
- Zou, Yuan, Harvard Business School
- Zou, Hong, University of Hong Kong
- Zou, Jiacheng, Stanford University
- Zou, Tianxin, University of Florida
- Zoumpoulis, Spyros, INSEAD
- Zubeldia, Martin, University of Minnesota, Twin Cities
- Zubrickas, Robertas, University of Bath
- Zucchi, Francesca, European Central Bank
- Zulehner, Christine, University of Vienna
- Zuo, Ruiting, Hong Kong University of Science and Technology
- Zuo, Sharon Xuejing, Fudan University
- Zureich, Jake, Lehigh University
- Zurita, Virgilio, Baylor University
- Zviadadze, Irina, HEC Paris
